# Supplementary material for: Controlling gene expression with deep generative design of regulatory DNA
Source: Springer Nature journal article supplement (doi:10.1038/s41467-022-32818-8), 2022-08-30
Supplement: 41467_2022_32818_MOESM1_ESM.pdf [file 41467_2022_32818_MOESM1_ESM.pdf]

# Controlling gene expression with deep generative design of regulatory DNA

Jan Zrimec<sup>1,2\*#</sup>, Xiaozhi Fu<sup>1\*</sup>, Azam Sheikh Muhammad<sup>3</sup>, Christos Skrekas<sup>1</sup>, Vyintas Jauniskis<sup>1,4</sup>, Nora K. Speicher<sup>3</sup>, Christoph S. Börlin<sup>1,5</sup>, Vilhelm Verendel<sup>3</sup>, Morteza Haghiri Chehreghani<sup>3</sup>, Devdatt Dubhashi<sup>3</sup>, Verena Siewers<sup>1</sup>, Florian David<sup>1</sup>, Jens Nielsen<sup>1,5</sup>, Aleksej Zelezniak<sup>1,6,7#</sup>

1 - Department of Biology and Biological Engineering, Chalmers University of Technology, Kemivägen 10, SE41296 Gothenburg, Sweden

2 - Department of Biotechnology and Systems Biology, National Institute of Biology, Večna pot 111, SI1000 Ljubljana, Slovenia

3 - Department of Computer Science and Engineering, Chalmers University of Technology, Rännvägen 6, SE41296 Gothenburg, Sweden

4 - Biomatter Designs, Zirmunu st. 139A, LT09120 Vilnius, Lithuania

5 - BioInnovation Institute, Ole Maaloes Vej 3, DK2200 Copenhagen N, Denmark

6 - Institute of Biotechnology, Life Sciences Centre, Vilnius University, Sauletekio al. 7, LT10257 Vilnius, Lithuania

7 - Randall Centre for Cell & Molecular Biophysics, King's College London, New Hunt's House, Guy's Campus, SE1 1UL London, UK

# corresponding authors (email: [aleksej.zelezniak@chalmers.se](mailto:aleksej.zelezniak@chalmers.se), [jan.zrimec@nib.si](mailto:jan.zrimec@nib.si))

\* These authors contributed equally.

## Table of contents

|                          |     |             |
|--------------------------|-----|-------------|
| Supplementary Figures    | ... | p.2 - p.28  |
| Supplementary Tables     | ... | p.29 - p.55 |
| Supplementary References | ... | p.56 - p.57 |

## Supplementary Figures

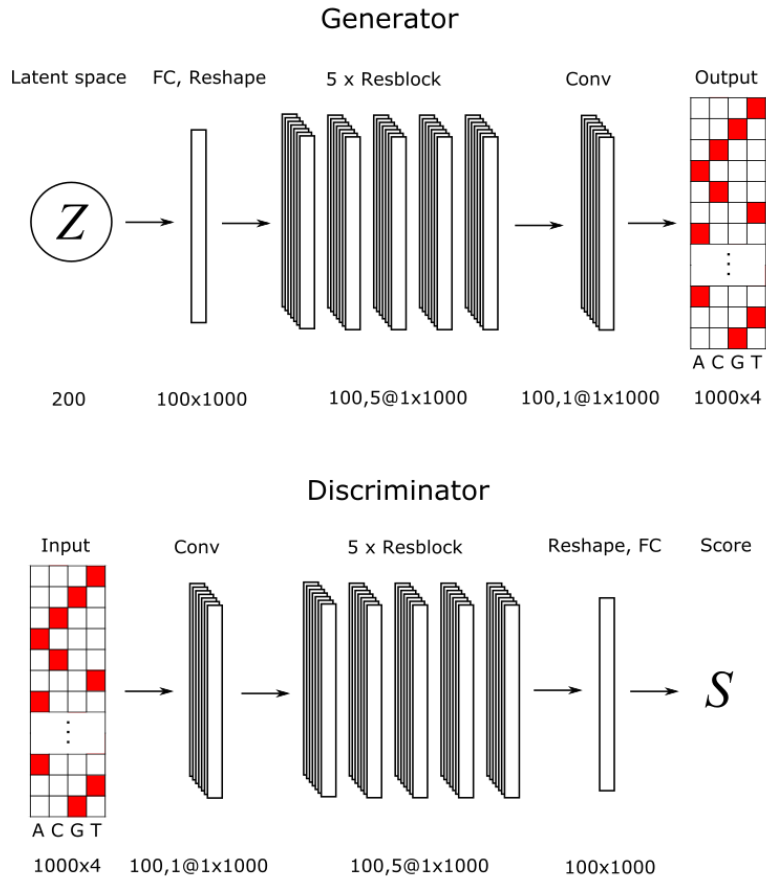

**Supplementary Figure 1.** Overview of generative adversarial network (GAN) approach and its deep neural network architectures. Red squares denote input values of 1 and white squares zeros.

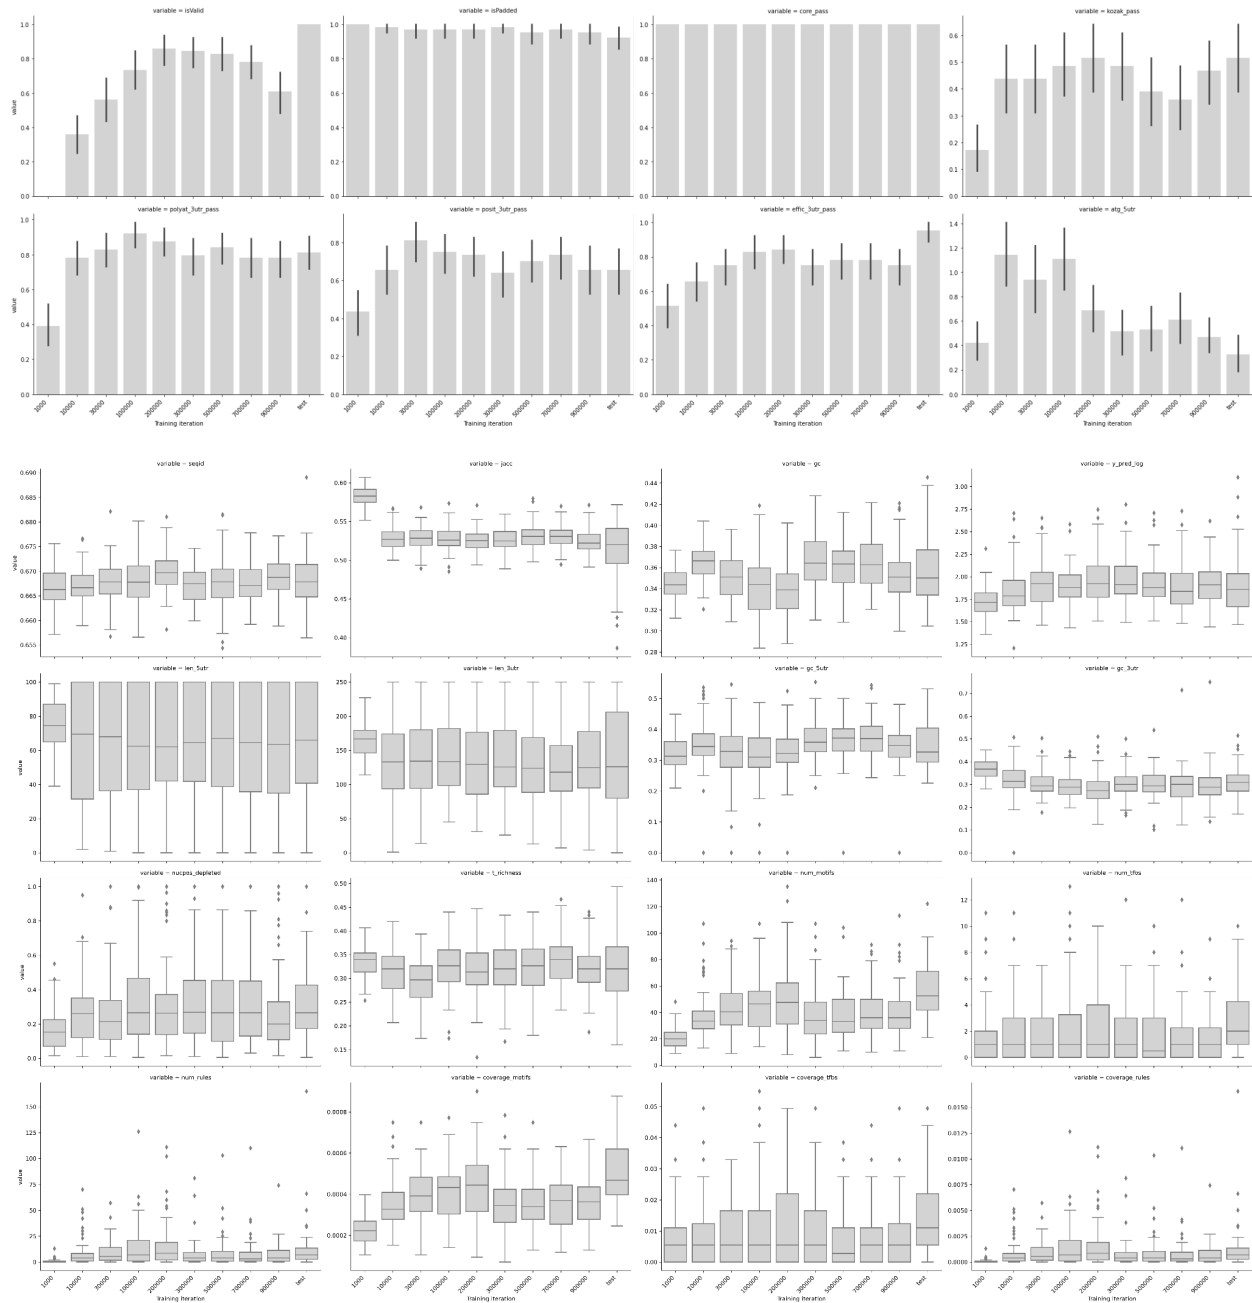

**Supplementary Figure 2.** Computed sequence properties (see Supplementary Table 3) of generated sequence variants sampled from the generative model after different amounts of training iterations ( $n = 64$  each). For bar plots, error bars represent 95% confidence intervals. For box plots, Boxes denote interquartile (IQR) ranges, centres mark medians and whiskers extend to 1.5 IQR from the quartiles.

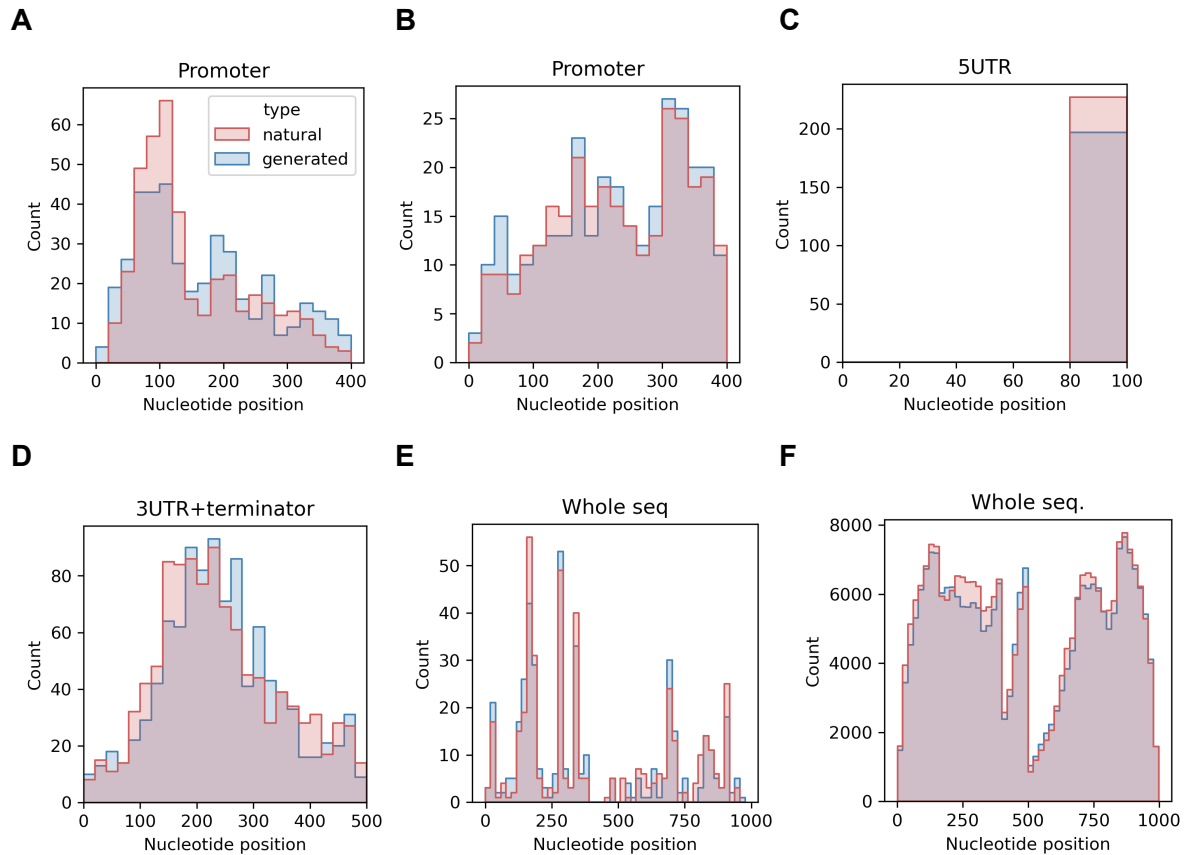

**Supplementary Figure 3.** Comparison of positional distributions of DNA regulatory grammar elements in sets of generated (red) and natural test (blue) sequences, including (A) transcription factor binding sites (TFBS) <sup>1</sup> and (B) TATA core promoter elements <sup>2,3</sup> in promoters, (C) Kozak sequences <sup>4,5</sup> in 5' UTRs, (D) termination related motifs (positioning, efficiency and poly-AT motifs) <sup>6,7</sup> in 3' UTRs and terminators, and (E) deep learning-uncovered expression-related motifs and motif association rules <sup>8</sup> as well as (F) nucleosome depletion <sup>9,10</sup> across all regions, with the nucleotide positions binned into 20 bp intervals. Relation of the given x axis to the gene is depicted in Figure 1A: promoters are located -400 bp upstream to the transcription start site, 5' UTR -100 bp upstream to the Start codon, 3' UTRs+terminators -250 bp upstream to +250 bp downstream of the transcription termination site.

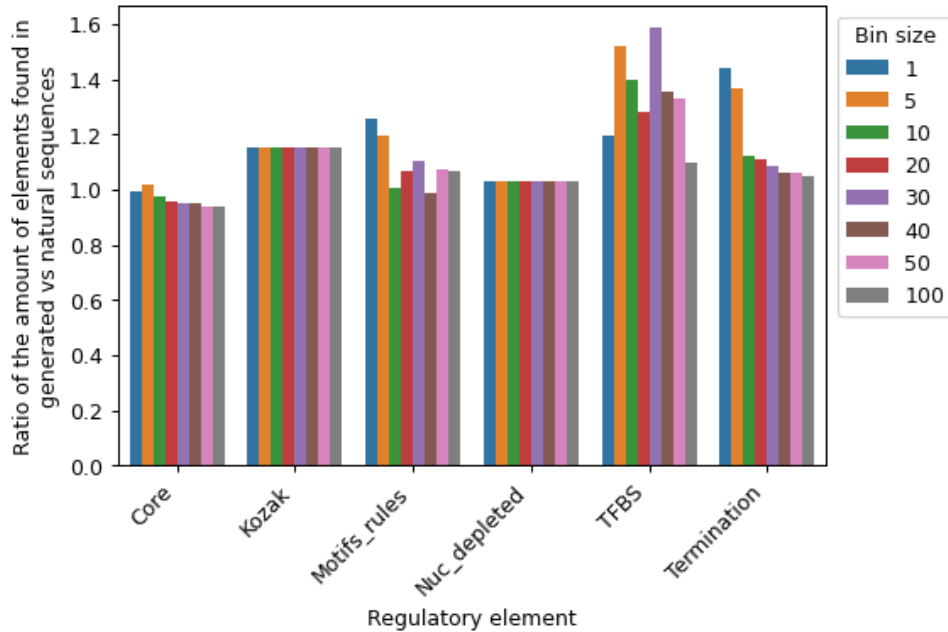

**Supplementary Figure 4.** Analysis of the overall number of DNA regulatory motifs and positions in the generated sequences compared to the amounts found in natural test sequences, when the corresponding locations were binned into different sized intervals (see Figure 2A,B regarding the description of the analyzed regulatory elements). Bin sizes are marked with colors: 1 blue, 5 orange, 10 green, 20 red, 30 violet, 40 brown, 50 pink and 100 gray.

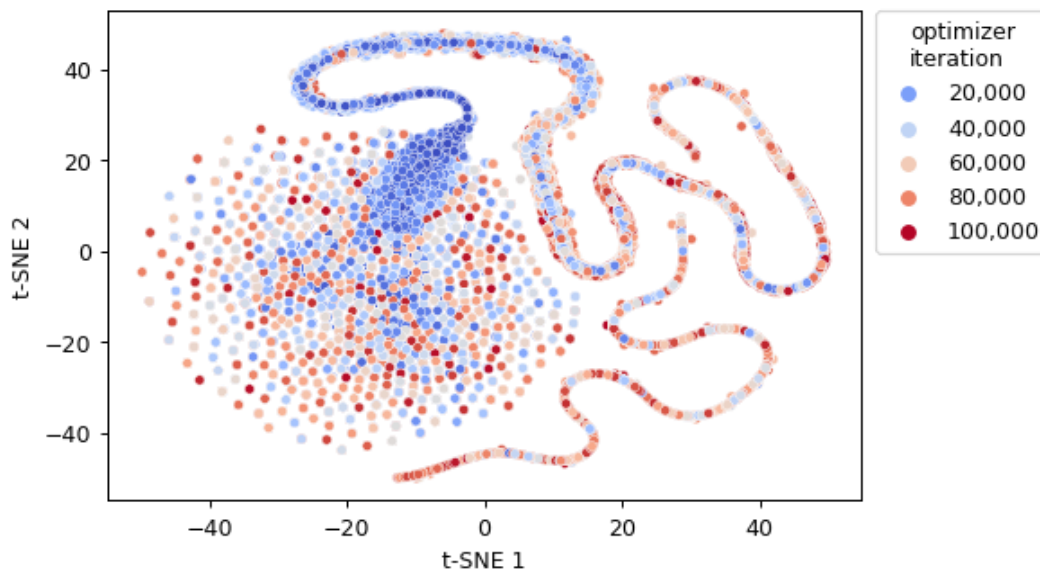

**Supplementary Figure 5.** T-distributed stochastic neighbour embedding (t-SNE) dimensionality reduction <sup>11</sup> over the latent space vectors of generated sequence variants with the predictor-guided optimization approach, merging the results of both maximization and minimization of gene expression and marked by optimizer iterations. The progression of optimizer iterations from 0 to 100,000 is marked with progression from blue to red, respectively.

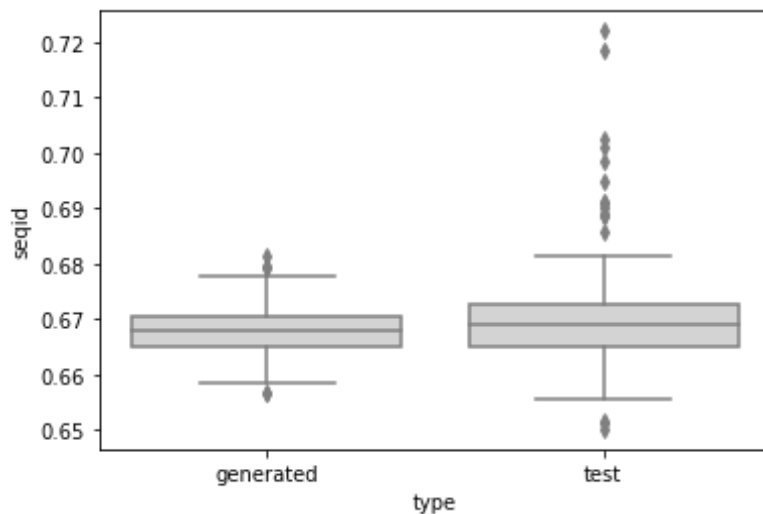

**Supplementary Figure 6.** Sequence identity of generated and natural test set sequences ( $n = 425$  each) versus their closest matching sequences in the training dataset. Boxes denote interquartile (IQR) ranges, centres mark medians and whiskers extend to 1.5 IQR from the quartiles.

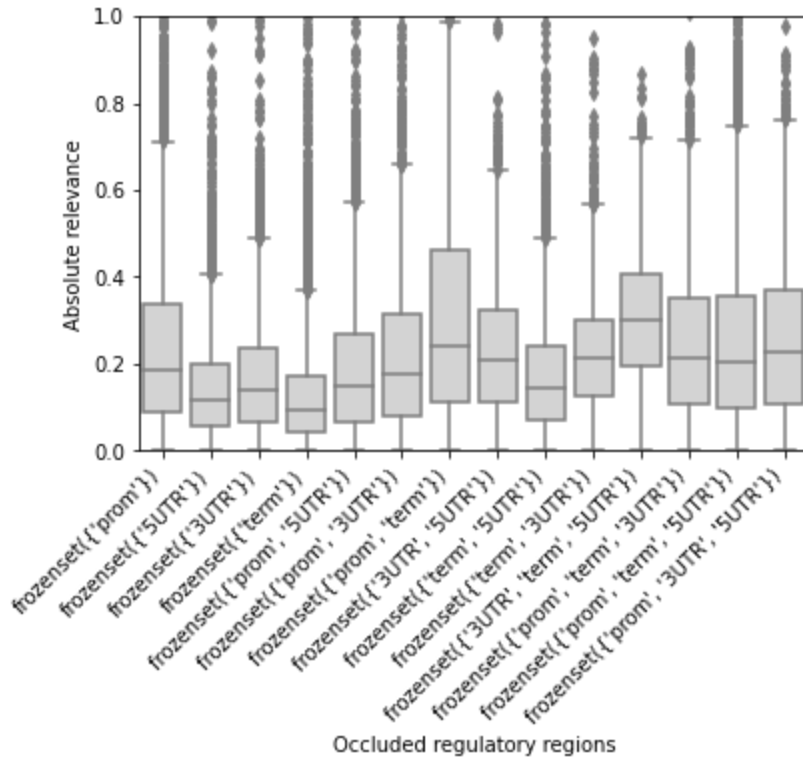

**Supplementary Figure 7.** Analysis of the relevance of different regulatory region combinations. Combinations of regions were occluded and absolute relevance scores were computed (see Methods M3) using the training dataset ( $n = 4238$  each, Methods M1). Median absolute relevance levels were 0.13, 0.19 and 0.24 with a number of 1, 2 or 3 occluded regions, respectively. The results suggest that the whole gene regulatory structure is important for fine-tuning gene expression, as each region carries information that contributes to prediction of expression levels<sup>12-17</sup>, with region combinations jointly controlling gene expression<sup>8,18</sup>. Boxes denote interquartile (IQR) ranges, centres mark medians and whiskers extend to 1.5 IQR from the quartiles.



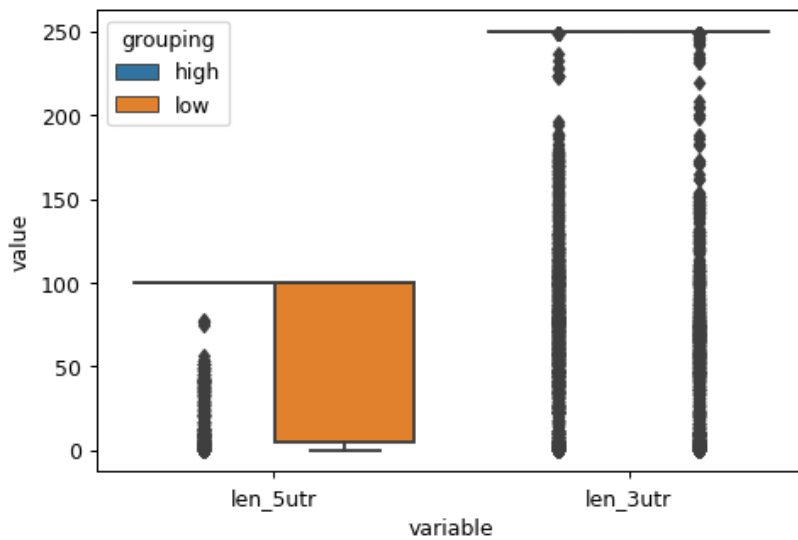

**Supplementary Figure 8.** Distributions of UTR lengths in high (blue) vs low (orange) expression sequences ( $n = 10,000$  each). Boxes denote interquartile (IQR) ranges, centres mark medians and whiskers extend to 1.5 IQR from the quartiles.

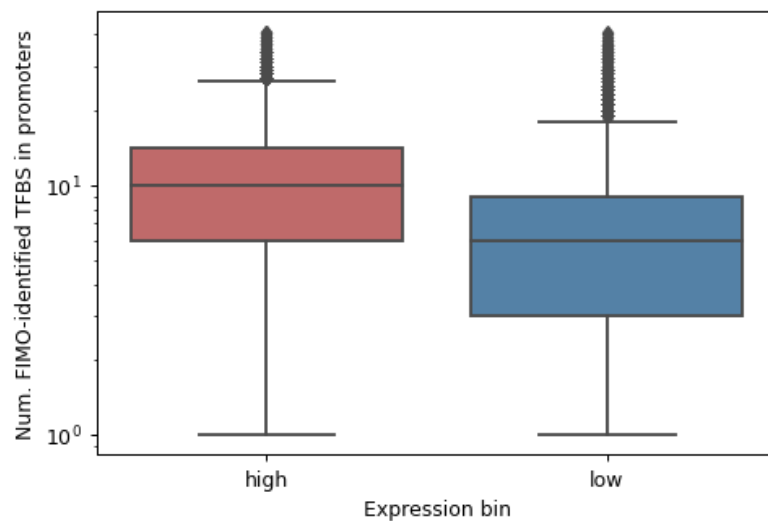

**Supplementary Figure 9.** Distributions of TFBS identified in the promoter regions of 20,000 generated sequences corresponding to either high (red) or low (blue) expression levels ( $n = 10,000$  each), using the algorithm FIMO<sup>19</sup> and a  $q$ -value cutoff of 0.05. Boxes denote interquartile (IQR) ranges, centres mark medians and whiskers extend to 1.5 IQR from the quartiles.

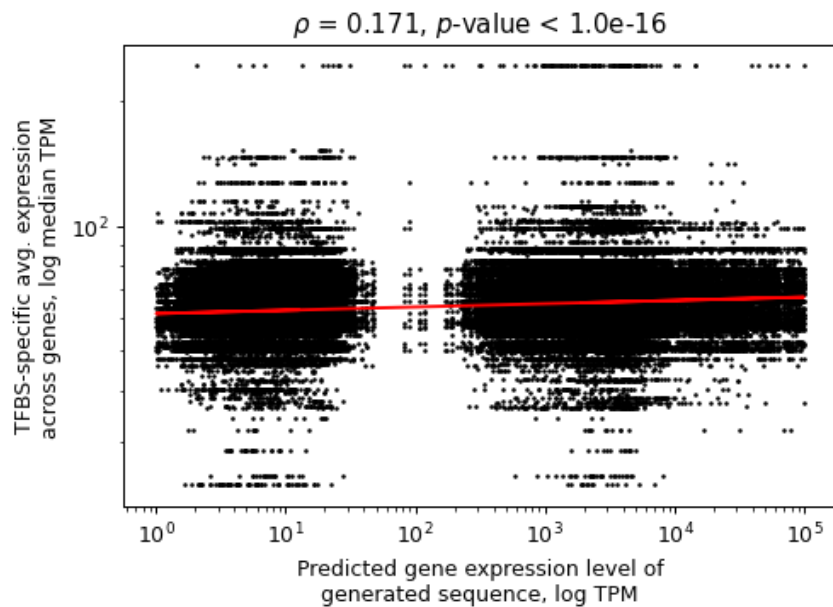

**Supplementary Figure 10.** Correlation analysis between median expression levels of natural genes, where a TFBS was found, and the predicted expression level of the generated sequence that carries the specific TFBS. Red line denotes least squares fit. The T-test was used for significance testing.

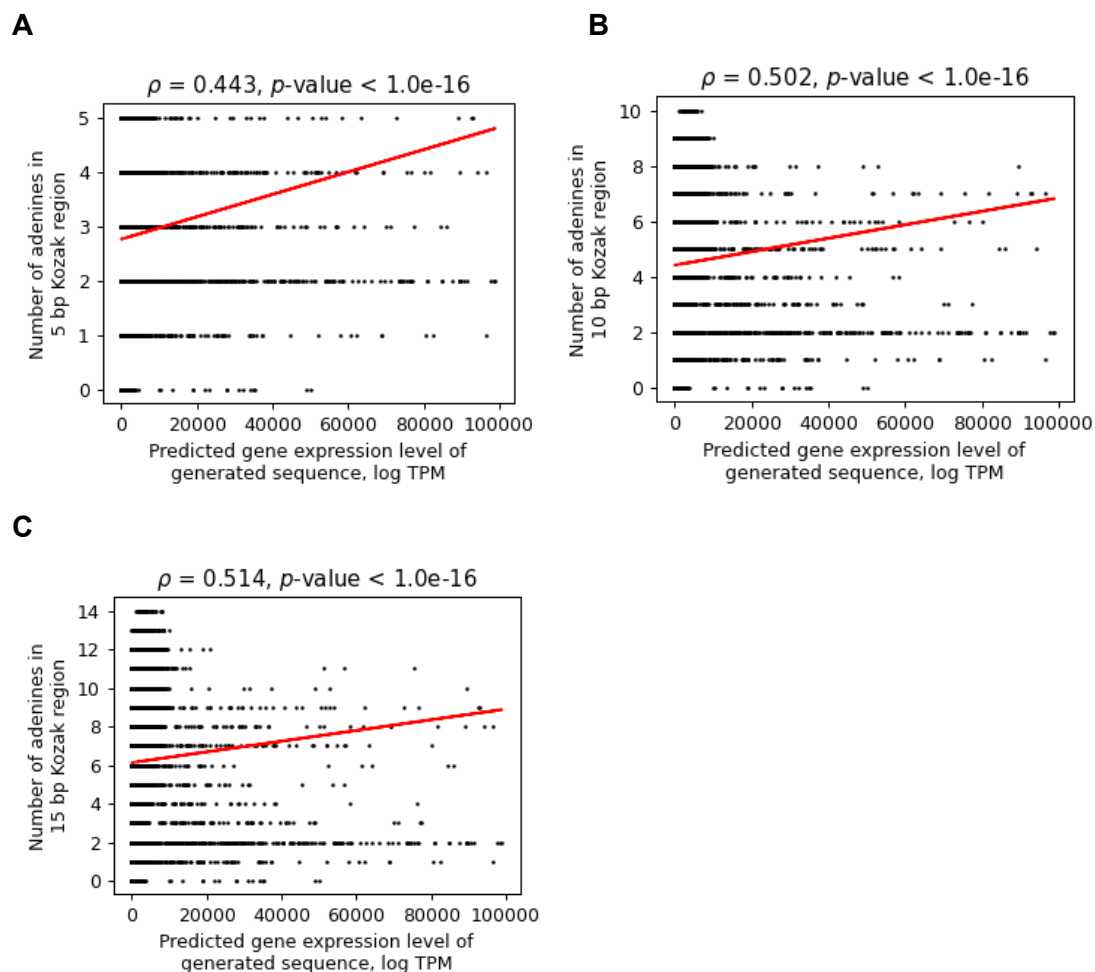

**Supplementary Figure 11.** Correlation analysis between the number of adenines in the (A) 5, (B) 10 and (C) 15 bp region upstream of the start codon, respectively, and predicted expression levels of the generated sequences. Red lines denote least squares fit. T-test was used.

**A**

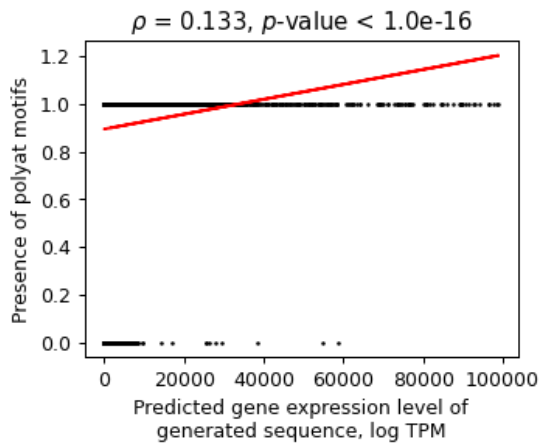

**B**

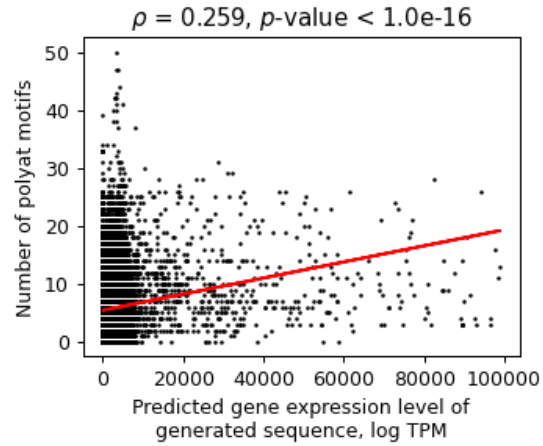

**C**

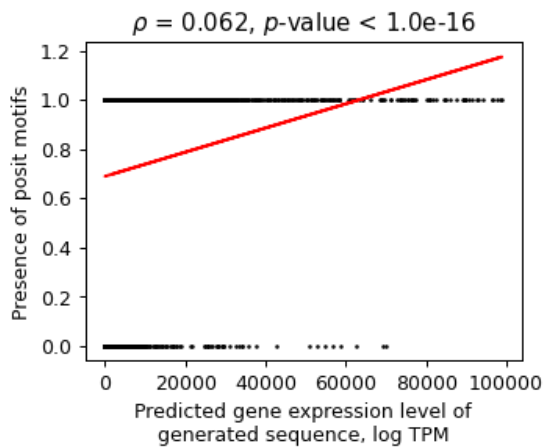

**D**

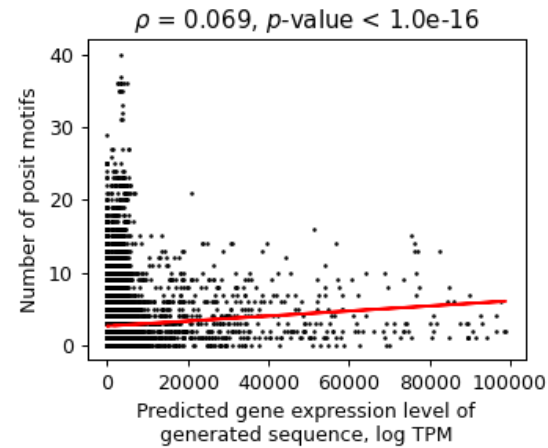

**E**

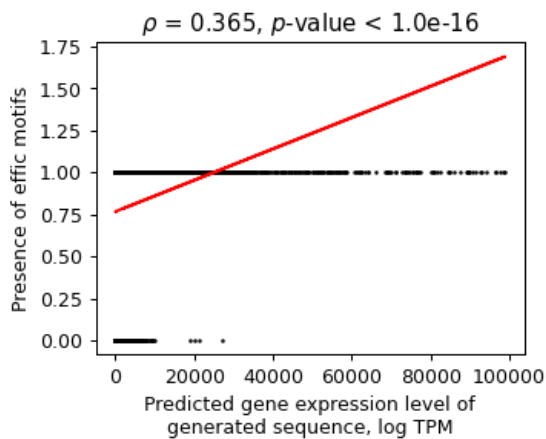

**F**

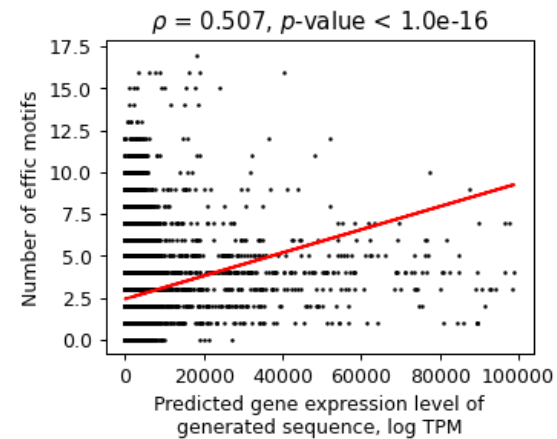

**Supplementary Figure 12.** Correlation analysis between the (A,C,E) presence and (B,D,F) number of (A,B) poly-A/T, (C,D) positioning and (E,F) efficiency motifs<sup>6,16,20</sup> versus predicted expression levels of the generated sequences. Red lines denote least squares fit. T-test was used.

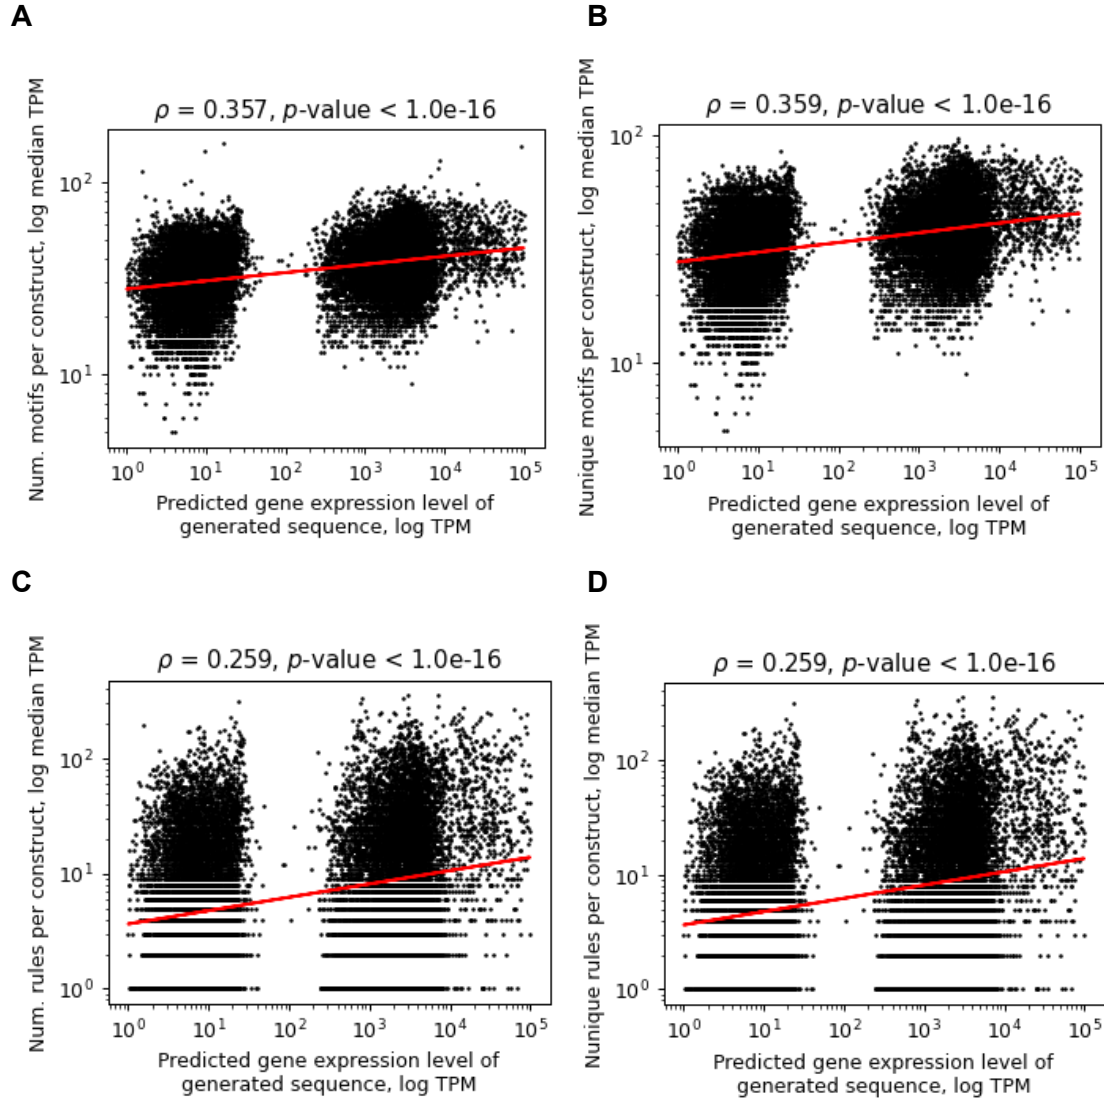

**Supplementary Figure 13.** Correlation analysis between the number of (A,C,E) all and (B,D,F) unique (A,B) deep-learning uncovered expression-related motifs and (C,D) motif association rules <sup>8</sup> versus predicted expression levels of the generated sequences. Red line denotes least squares fit. T-test was used.

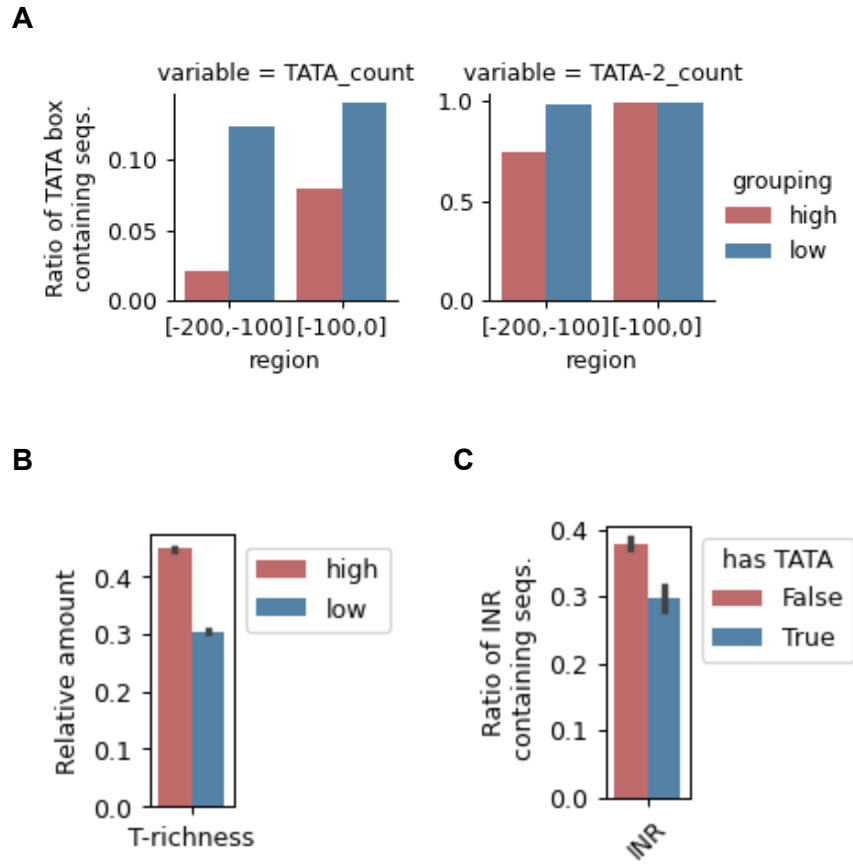

**Supplementary Figure 14.** Analysis of the core promoter region. (A) Proportion of exact TATA and TATA-like (2 mutations from the consensus 5'-TATAWAWR-3')<sup>2,21</sup> motif-carrying generated sequences in the high (red) and low (blue) expression bins (Figure 4A) across the distal and proximal parts of the core promoter region (Figure 4C). (B) Relative amount of thymines (T-richness) in the [-75, TSS] region<sup>3</sup> of the high (red) and low (blue) expression sequences ( $n = 10,000$  each). (C) Proportion of sequences containing the mammalian-type INR motif in the [-30, TSS] region<sup>22</sup> in relation to them also carrying a TATA box ( $n = 16,386$  and  $3614$  with False and True subsets, respectively, marked red and blue, respectively). Error bars in (B, C) represent 95% confidence intervals.



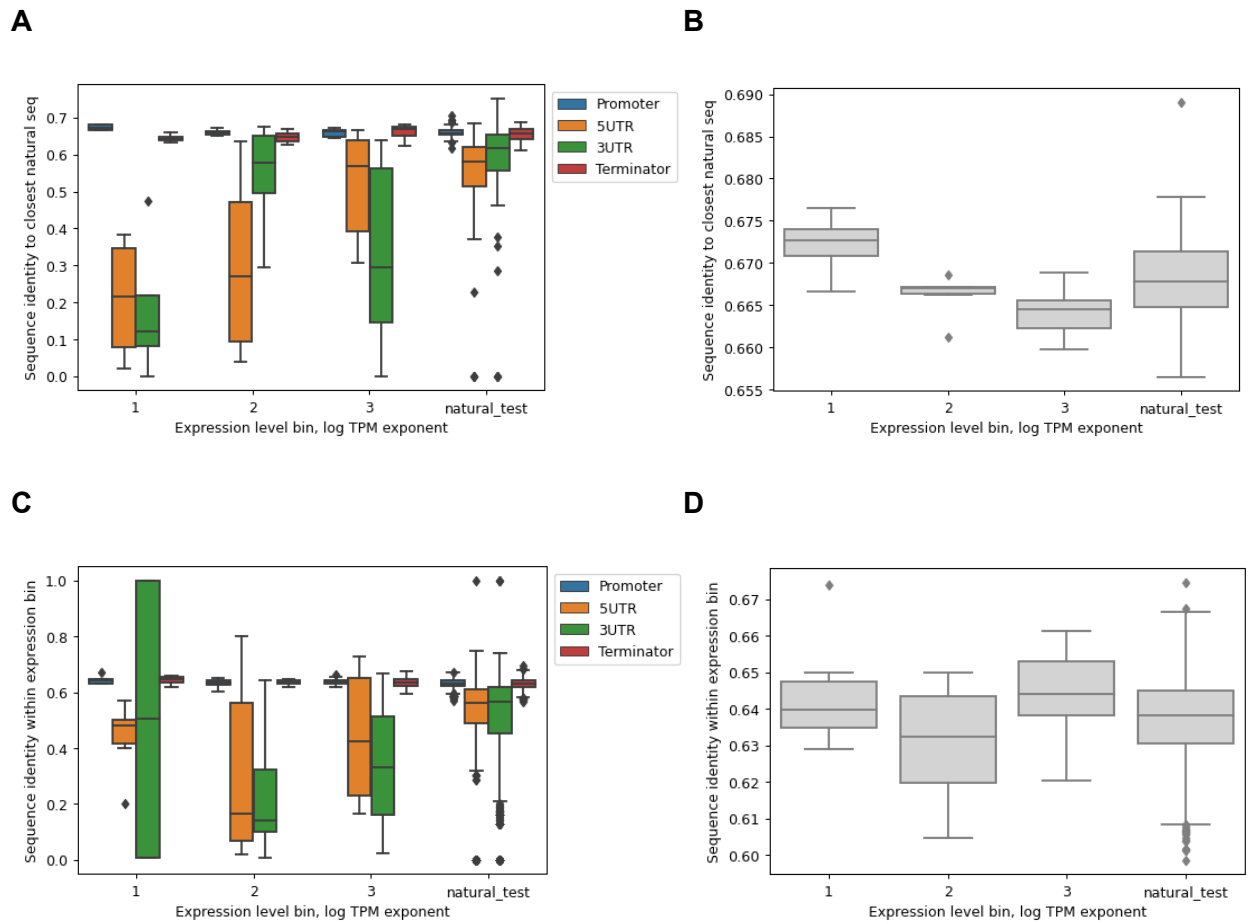

**Supplementary Figure 15.** Sequence identity of the experimentally validated generated variants (see Supplementary Table 4) and natural test set sequences (A,B) to closest sequence in training dataset ( $n = 16, 24, 28, 256$ , respectively) and (C,D) within experimental bins (defined by predicted expression levels of generated sequences;  $n = 24, 60, 84, 8064$ , respectively), computed across (A,C) separate regions of the regulatory structures (promoter marked blue, 5'UTR orange, 3'UTR green, terminator red) or (B,D) whole regulatory sequences. Boxes denote interquartile (IQR) ranges, centres mark medians and whiskers extend to 1.5 IQR from the quartiles.

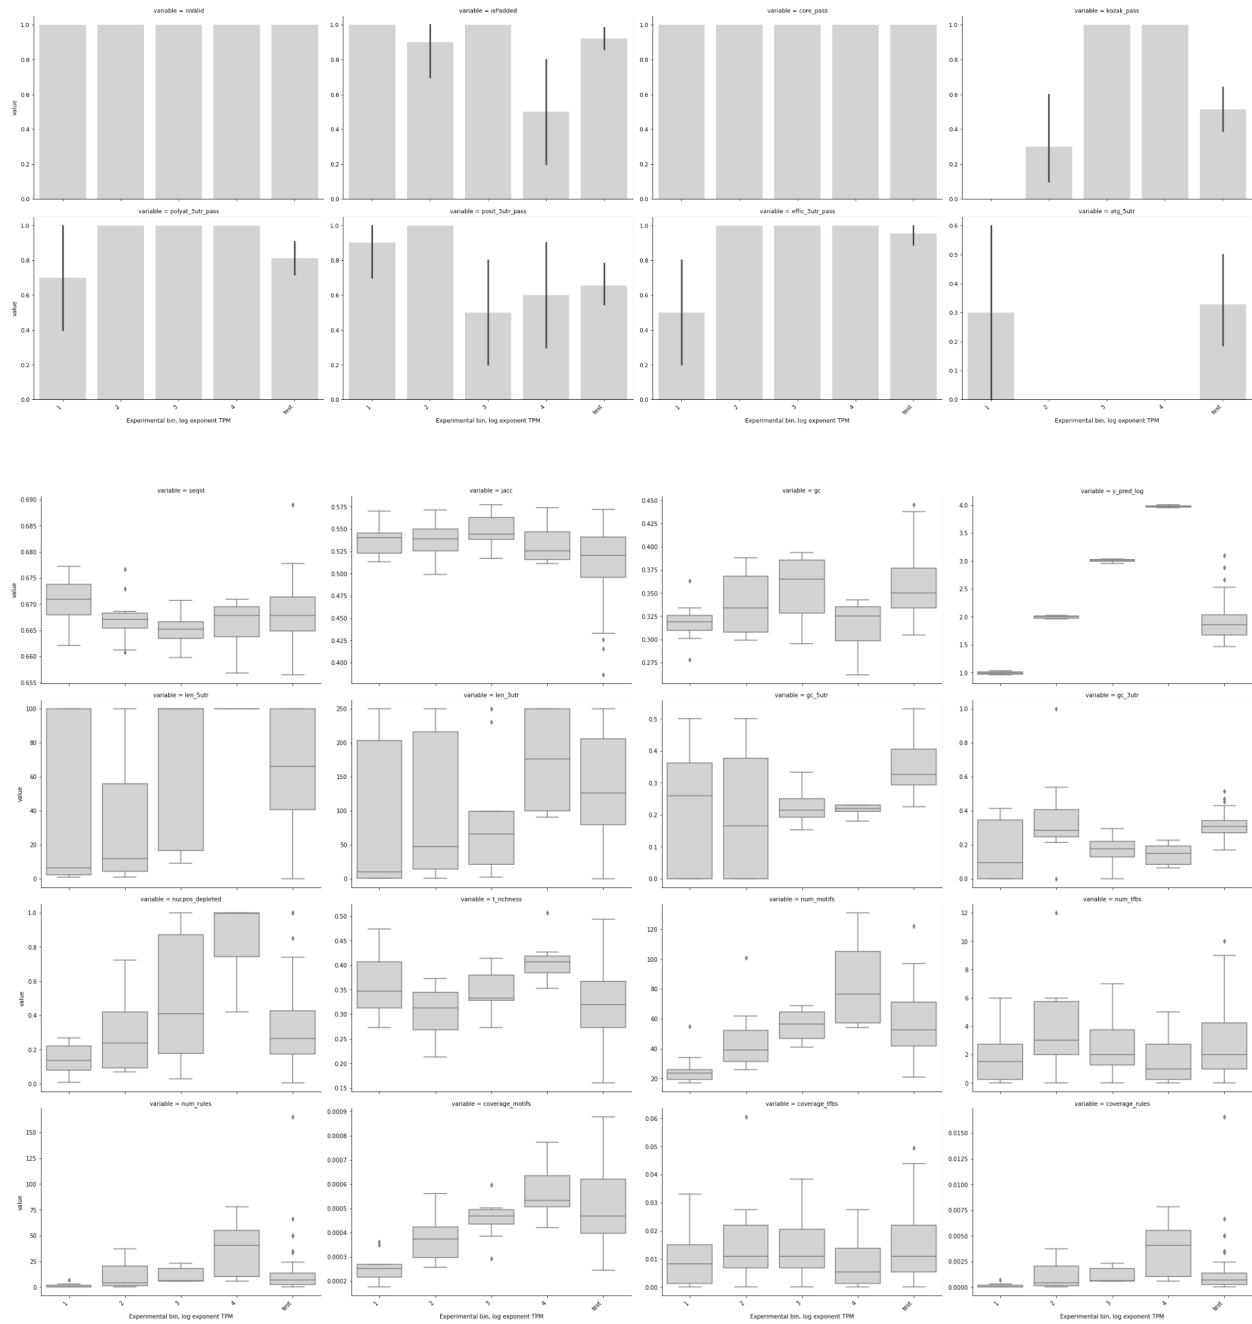

**Supplementary Figure 16.** Computed sequence properties (see Supplementary Table 3) of generated variants sampled across 4 orders of magnitude of expression levels (see Figure 3C: predicted TPM of 10, 100, 1000, 1000;  $n = 64$  each). For bar plots, error bars represent 95% confidence intervals. For box plots, Boxes denote interquartile (IQR) ranges, centres mark medians and whiskers extend to 1.5 IQR from the quartiles.

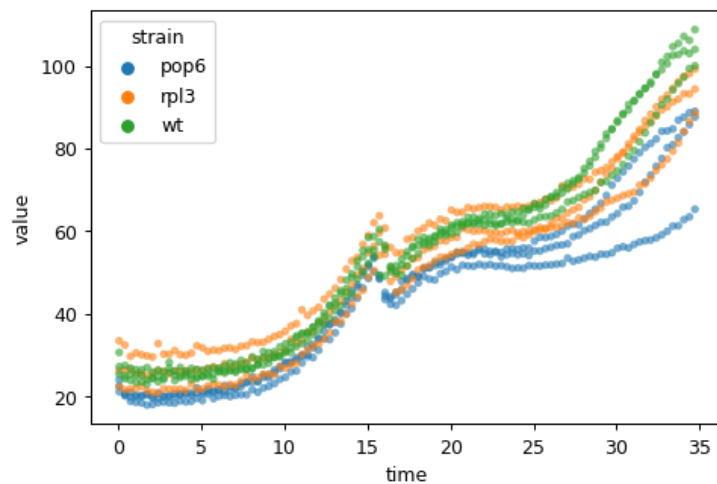

**Supplementary Figure 17.** Biomass measurements using a bioreactor (Methods M5) showing that the GFP gene did not affect cell growth. Different strains are color-coded: POP6 blue, RPL3 orange and WT green.

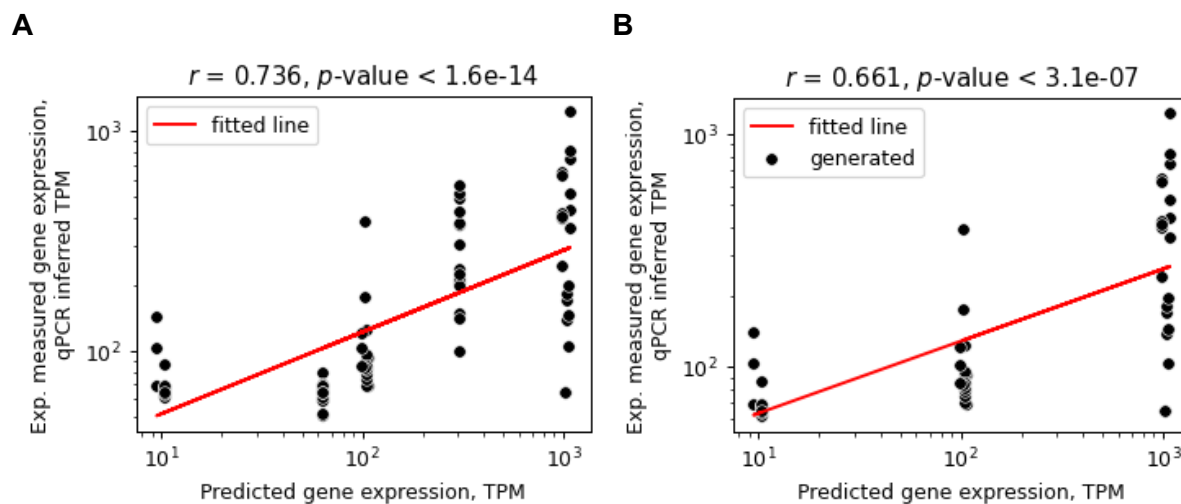

**Supplementary Figure 18.** Correlation analysis across experimental bins of generated sequence variants (A) including all measured constructs (generated sequences and controls) or (B) including only generated sequences. Red lines denote least squares fit. T-test was used.

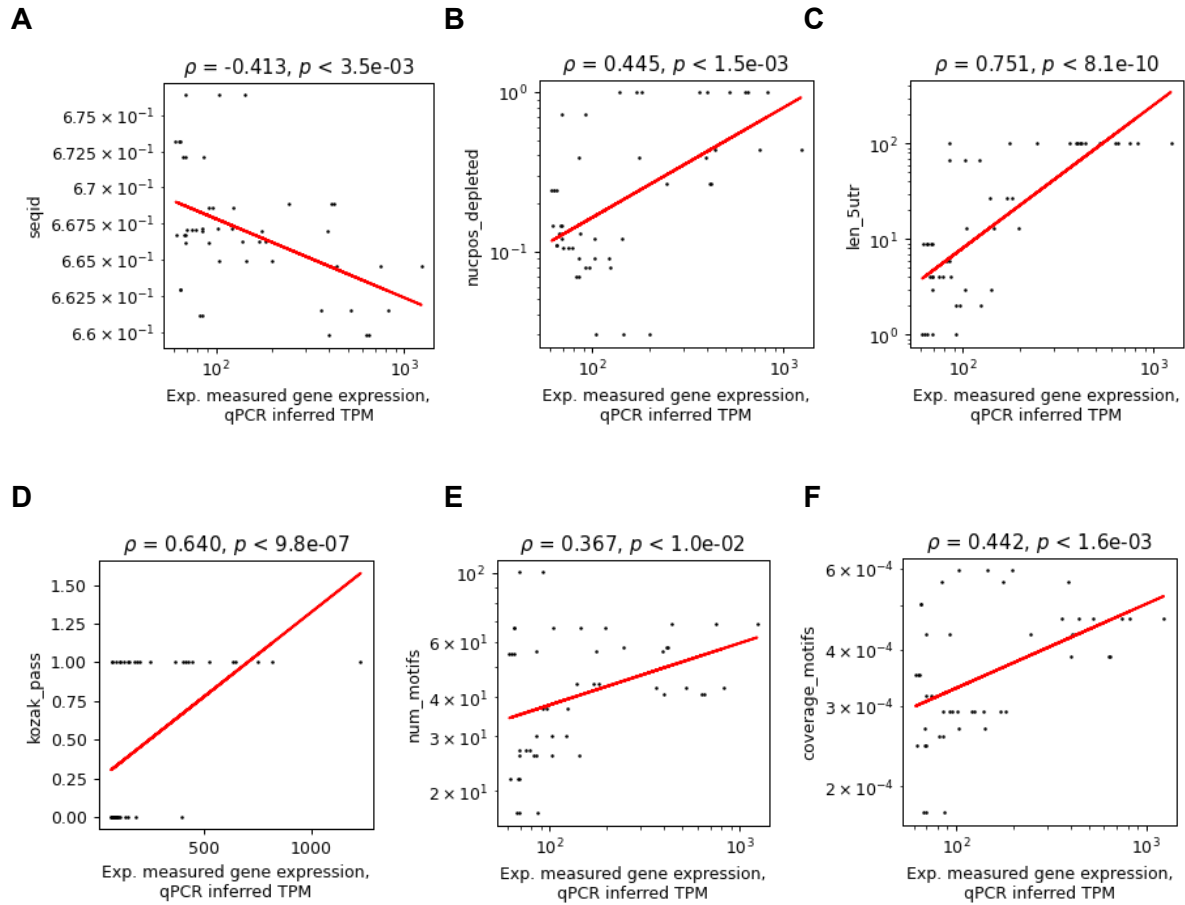

**Supplementary Figure 19.** Correlation analysis between experimentally measured mRNA levels and predicted DNA sequence properties: (A) sequence homology to the closest sequence in the natural training dataset, (B) proportion of predicted nucleosome depletion<sup>9,10</sup> across the whole sequence, (C) length of the 5' UTR region, (D) presence of a Kozak sequence<sup>4</sup> as well as (E) number and (F) coverage of known expression-related motifs<sup>8</sup>. Red lines denote least squares fit. T-test was used.

**A**

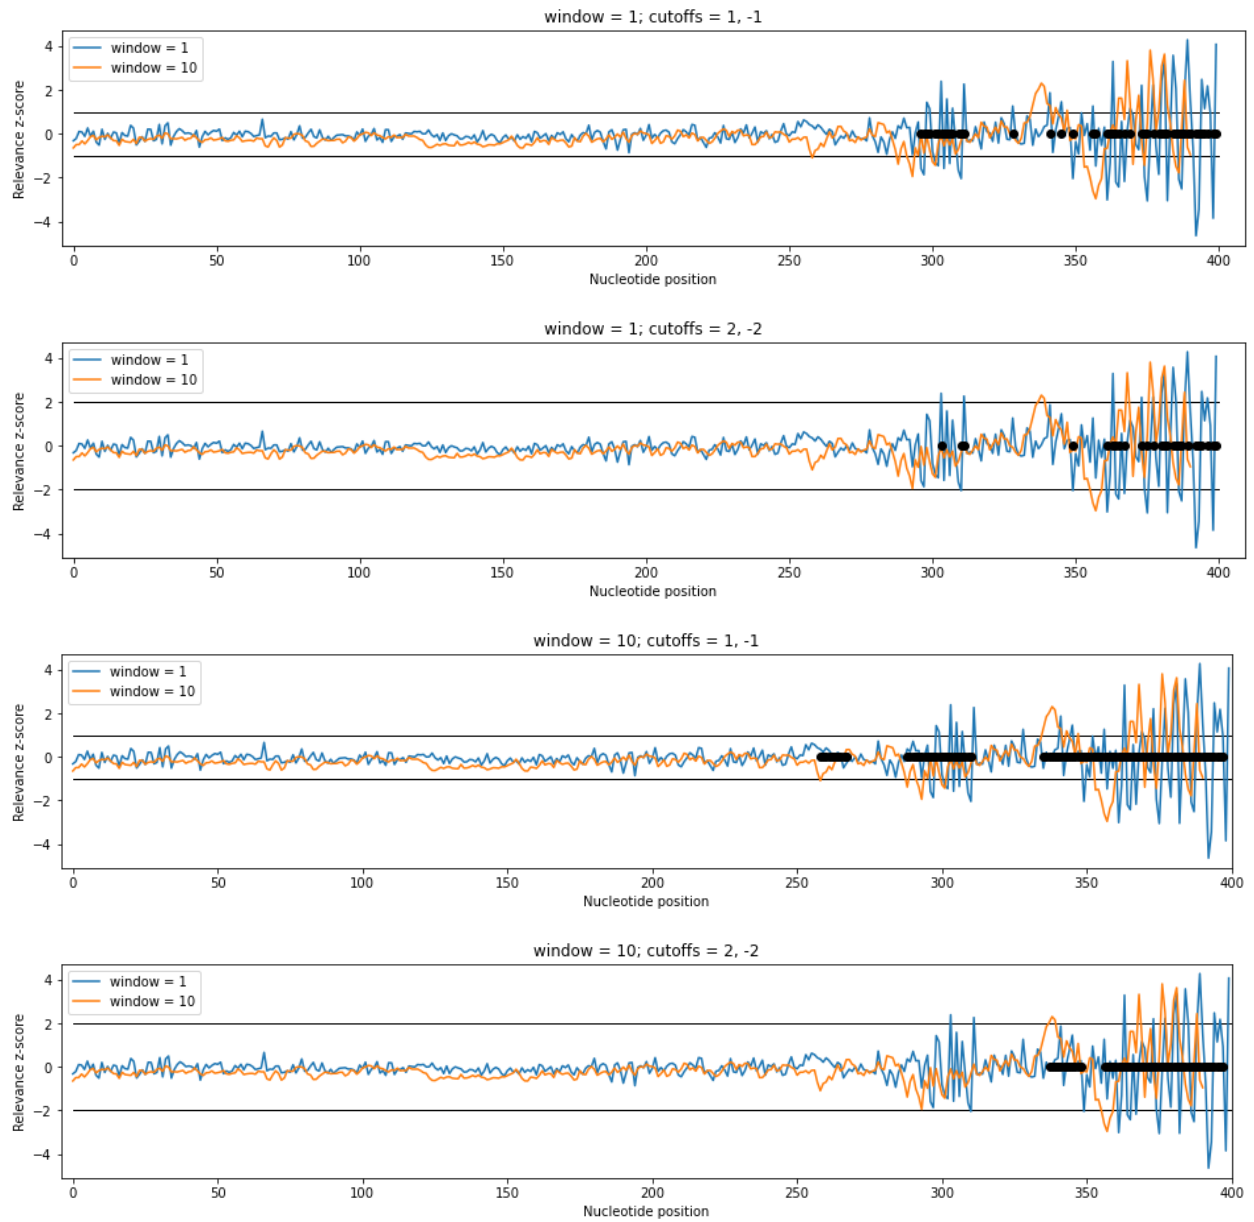

**B**

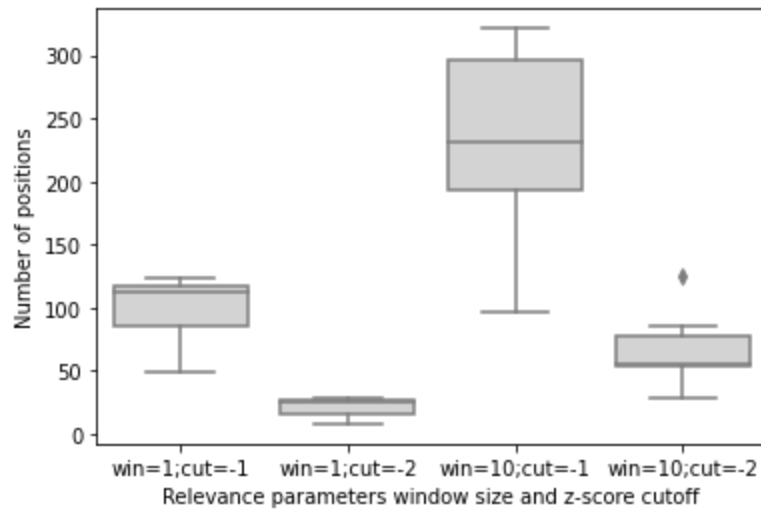

**Supplementary Figure 20.** (A) Visualization of relevance profiles and relevant positions in the regulatory regions of the RPL3 gene, with window sizes of 1 (blue) and 10 (orange). (B) total number of relevant positions, at different window size and z-score cutoff ( $n = 14$  each). Boxes denote interquartile (IQR) ranges, centres mark medians and whiskers extend to 1.5 IQR from the quartiles.

**A**

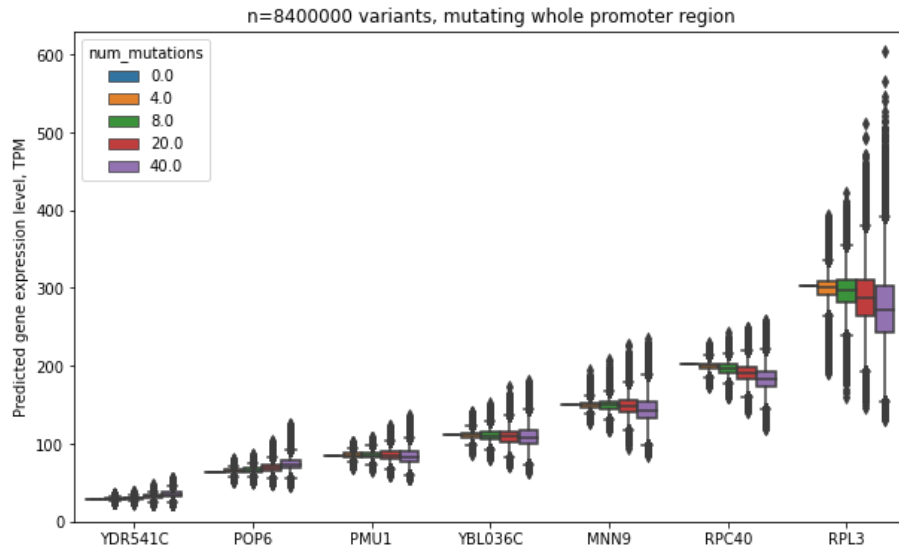

**B**

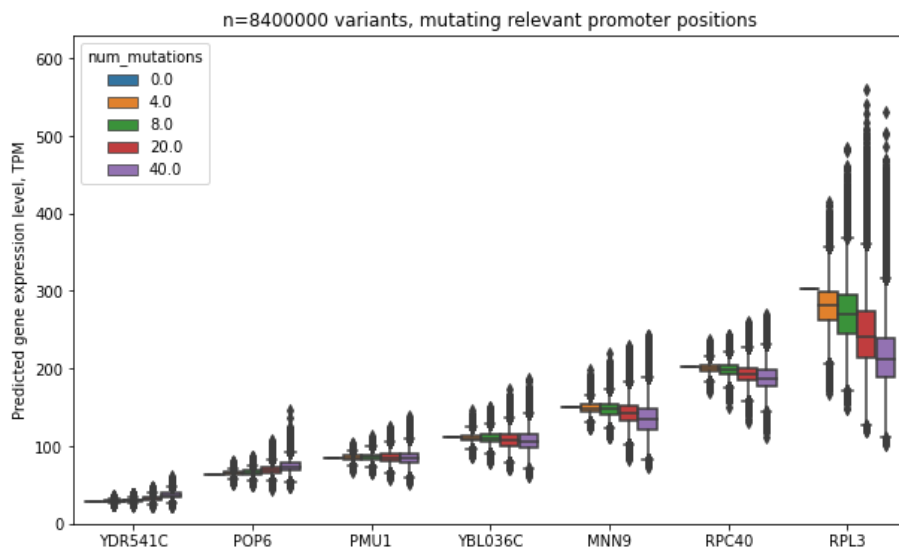

**Supplementary Figure 21.** Predicted gene expression levels across sequence variants obtained by mutating (A) whole promoter regions and (B) only the most relevant positions as defined by querying the predictor's sensitivity ( $n = 300,000$  each except with initial non-mutated sequences where  $n = 1$ ). Apart from non-mutated sequences (blue), the numbers of mutations of 4 bp (orange), 8 bp (green), 20 bp (red) and 40 bp (violet) correspond to 1%, 2%, 5% and 10% of mutated sequence. Boxes denote interquartile (IQR) ranges, centres mark medians and whiskers extend to 1.5 IQR from the quartiles.



**A**

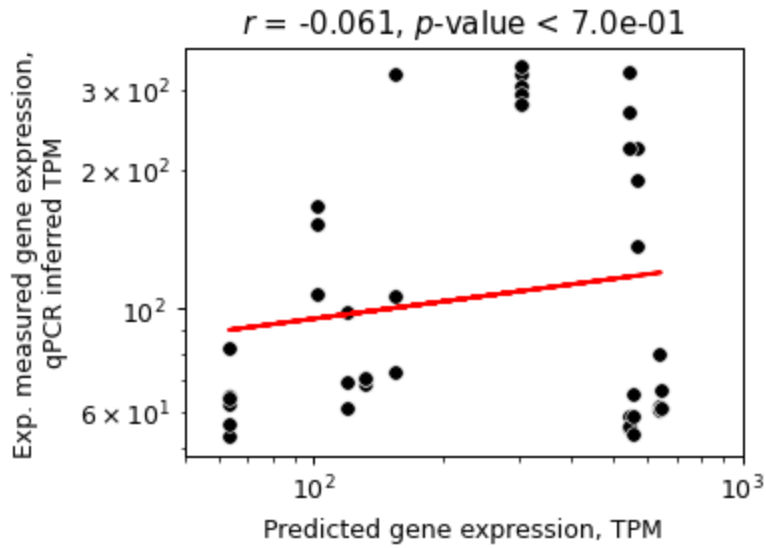

**B**

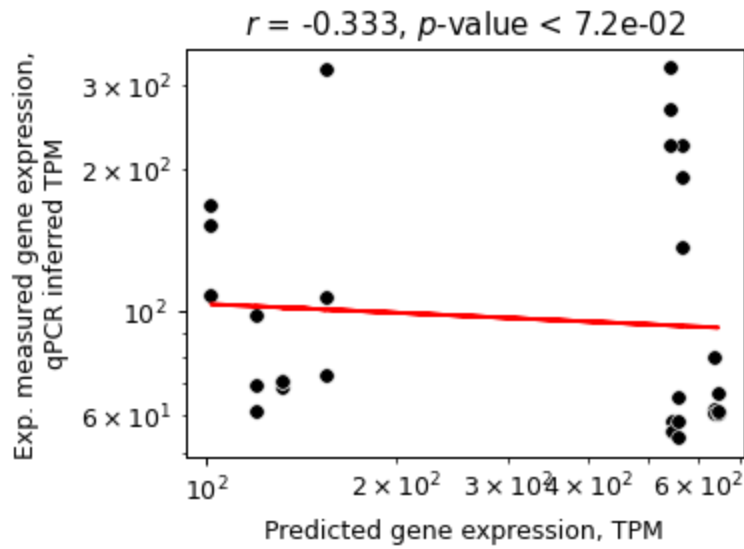

**Supplementary Figure 22.** Correlation analysis of experimentally tested sequence variants from the mutational approach with (A) included controls and (B) only designed constructs. Red lines denote least squares fit. T-test was used.

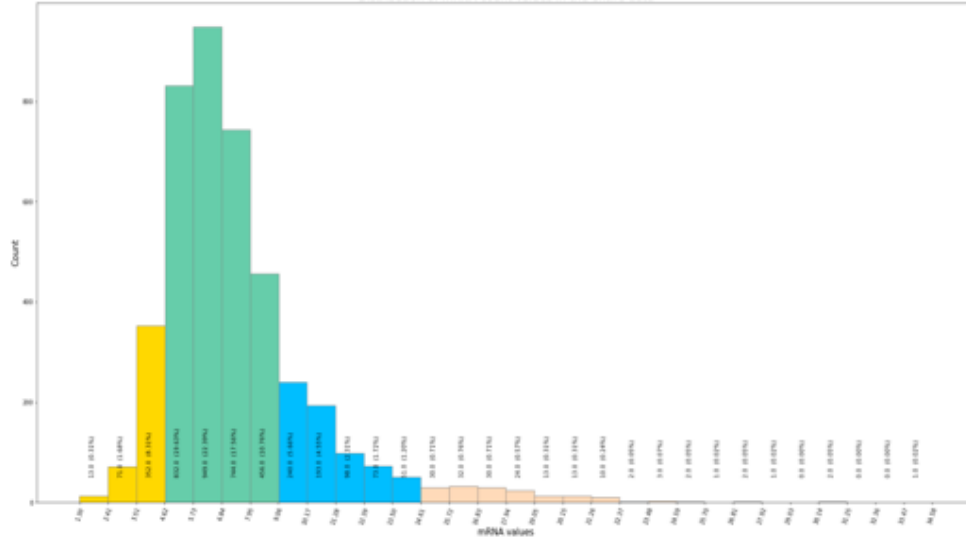

**Supplementary Figure 23.** Binning the generative model training data across mRNA counts to perform data balancing. Left tail of the distribution (box-cox transformed mRNA level values < 4.62) is marked yellow (4.62 < mRNA values < 8.04), center green (8.04 < mRNA values < 24.35), early right tail blue and late right tail (mRNA values < 24.35) orange.

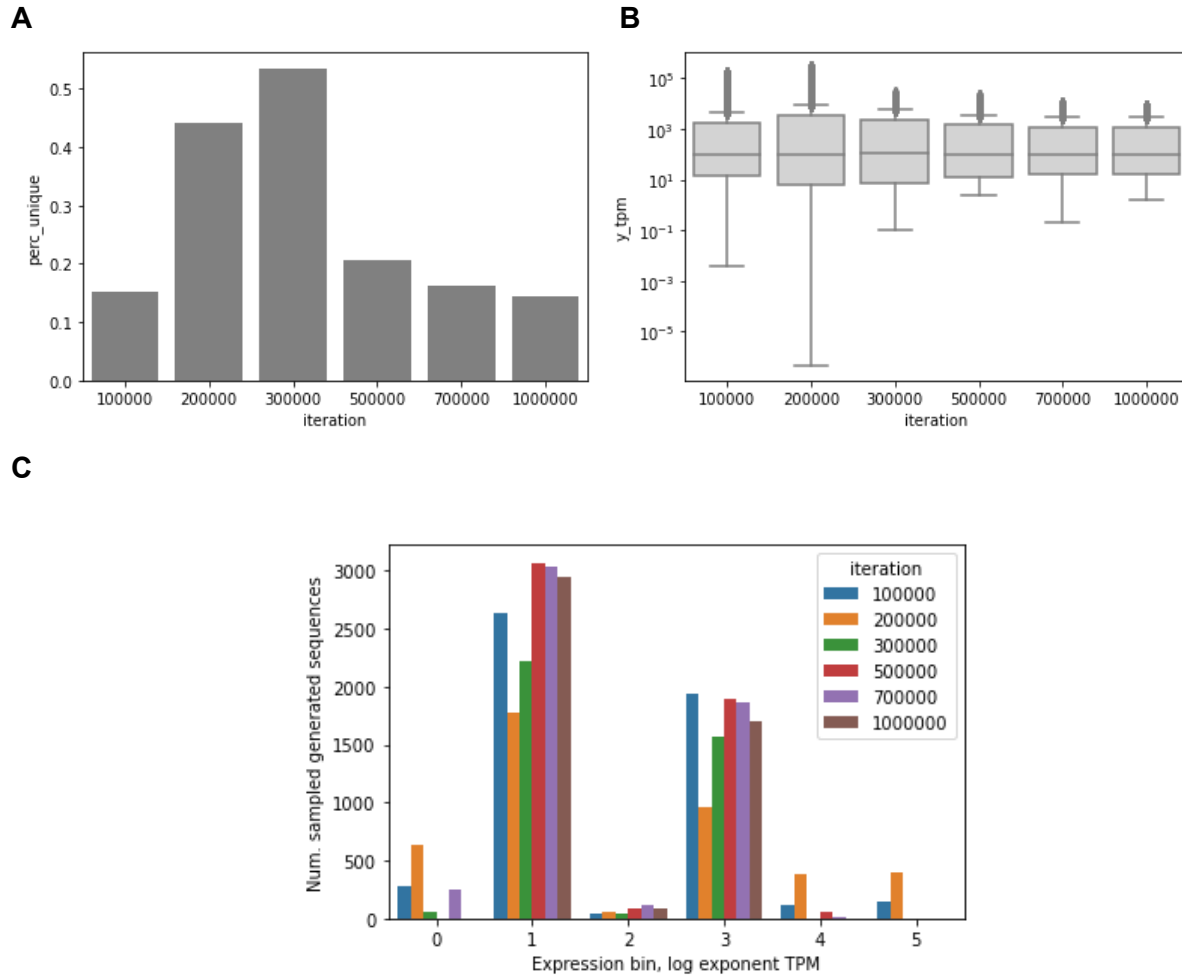

**Supplementary Figure 24.** Generative model selection by comparing (A) the percentage of unique generated sequences, (B) the range of predicted gene expression levels ( $n = 64,128$  each) and (C) the number of generated sequences that could be sampled across a range of 6 orders of magnitude of predicted expression levels per generator. Number of iterations in (C) is color-coded: 100,000 blue, 200,000 orange, 300,000 green, 500,000 red, 700,000 violet and 1,000,000 brown. The generators were obtained at different amounts of training iterations and were further optimized with the predictor-guided optimization procedure for 100,000 iterations (see Methods M4). The generator at 200,000 iterations produced the widest range of expression levels with highest amounts of samples in the more extreme expression bins. For box plots in (B), Boxes denote interquartile (IQR) ranges, centres mark medians and whiskers extend to 1.5 IQR from the quartiles.

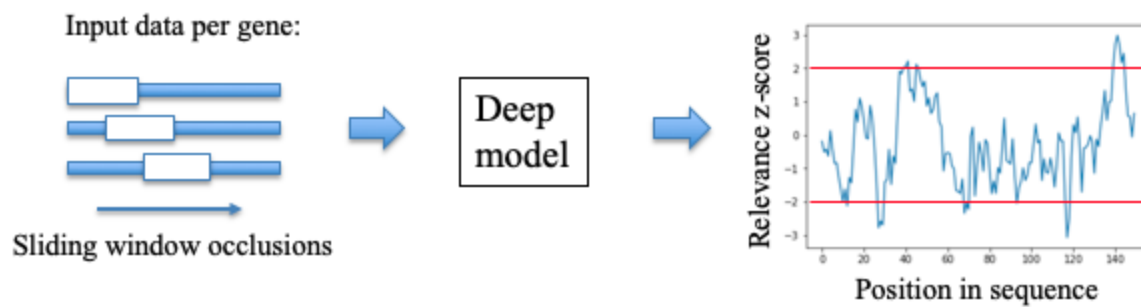

**Supplementary Figure 25.** Schematic overview of the implemented DNA sequence occlusion-relevance approach<sup>8,23</sup>. Red lines denote z-score of  $\pm 2$ .

## Supplementary Tables

**Supplementary Table 1.** Verified DNA sequence properties. Properties with underlined variable names were used in the sequence selection procedure.

| Type               | Variable name           | Description                                                                                              |
|--------------------|-------------------------|----------------------------------------------------------------------------------------------------------|
| seq. similarity    | <u>segid</u>            | Ratio of Levenshtein 'edit' distance to longer seq. length                                               |
| seq. similarity    | jacc                    | Jaccard distance                                                                                         |
| seq. composition   | isPadded                | Check if sequence contains Ns                                                                            |
| seq. composition   | <u>isValid</u>          | Check if sequence contains Ns in correct positions (UTR borders only)                                    |
| seq. composition   | gc                      | GC-content                                                                                               |
| seq. composition   | <u>len_5utr</u>         | Length of 5' UTR region <sup>15,24</sup>                                                                 |
| seq. composition   | <u>len_3utr</u>         | Length of 3' UTR region <sup>15,24</sup>                                                                 |
| seq. composition   | gc_5utr                 | GC-content of 5' UTR region <sup>15,24</sup>                                                             |
| seq. composition   | gc_3utr                 | GC-content of 5' UTR region <sup>15,24</sup>                                                             |
| seq. composition   | t_richness              | T nucleotide richness in region from TSS to TATA box (region 0 to 150 bp from TSS analyzed) <sup>3</sup> |
| seq. composition   | <u>homopolymer</u>      | Presence of homopolymers of length >9 bp, as they can limit synthesis                                    |
| regulatory grammar | <u>nucpos_depleted</u>  | Nucleosome depletion based on R package nuCpos <sup>9,10</sup>                                           |
| regulatory grammar | <u>core_pass</u>        | Presence of core promoter sequence 5'-TATAWAWR-3' <sup>2,3</sup>                                         |
| regulatory grammar | <u>kozak_pass</u>       | Presence of an A-rich Kozak seq. in 5' UTR of 5-15 bp <sup>4,5</sup>                                     |
| regulatory grammar | <u>polyat_3utr_pass</u> | Presence of poly-A/T seq. in 3' UTR or terminator <sup>7,20,25</sup>                                     |
| regulatory grammar | <u>posit_3utr_pass</u>  | Presence of positioning element 5'-AAWAAA-3 in 3' UTR or terminator <sup>6,7</sup>                       |
| regulatory grammar | <u>effic_3utr_pass</u>  | Presence of efficiency element 5'-TATDTA-3 in 3' UTR or terminator <sup>6,16</sup>                       |
| regulatory grammar | <u>atg_5utr</u>         | Presence of upstream ATGs in 5' UTR <sup>15,26</sup>                                                     |
| regulatory grammar | num_motifs              | Overall num. relevant sequence motifs identified from reference study <sup>8</sup>                       |
| regulatory grammar | num_tfbs                | Overall num. TFBS from the Jaspar and Yeastract databases <sup>1,27</sup>                                |
| regulatory grammar | num_rules               | Overall num. motif association rules identified from reference study <sup>8</sup>                        |
| regulatory grammar | <u>coverage_motifs</u>  | Coverage of relevant sequence motifs identified from reference study <sup>8</sup>                        |
| regulatory grammar | <u>coverage_tfbs</u>    | Coverage of TFBS from the Jaspar and Yeastract databases <sup>1,27</sup>                                 |
| regulatory grammar | <u>coverage_rules</u>   | Coverage of motif association rules identified from reference study <sup>8</sup>                         |
| model predictions  | <u>y_pred</u>           | Predicted gene expression level <sup>8</sup>                                                             |

**Supplementary Table 2.** Experimental validation (Methods M6) of designed sequence constructs with the generative approach (Methods M4).

| construct | bin       | batch | predicted TPM | avg. 2pddct | qPCR inferred TPM |
|-----------|-----------|-------|---------------|-------------|-------------------|
| 5         | gen ~10   | 5     | 10.33         | 12.65       | 63.12             |
| 6         | gen ~10   | 5     | 10.41         | 28.35       | 66.47             |
| 7         | gen ~10   | 5     | 10.35         | 64.67       | 74.22             |
| 10        | gen ~10   | 4     | 9.45          | 13.95       | 104.65            |
| 15        | gen ~100  | 2     | 104.04        | 51.69       | 83.33             |
| 17        | gen ~100  | 4     | 97.94         | 13.64       | 102.90            |
| 18        | gen ~100  | 2     | 103.65        | 36.74       | 74.23             |
| 19        | gen ~100  | 2     | 103.86        | 85.74       | 104.07            |
| 20        | gen ~100  | 2     | 106.48        | 47.35       | 80.69             |
| 23        | gen ~100  | 4     | 103.33        | 33.72       | 216.87            |
| 26        | gen ~1000 | 2     | 1,027.04      | 21.78       | 65.12             |
| 27        | gen ~1000 | 3     | 1,055.05      | 9.38        | 149.07            |
| 28        | gen ~1000 | 1     | 1,046.14      | 9.70        | 163.82            |
| 29        | gen ~1000 | 1     | 989.01        | 39.54       | 558.62            |
| 31        | gen ~1000 | 1     | 1,076.07      | 58.27       | 806.45            |
| 33        | gen ~1000 | 4     | 1,077.47      | 95.58       | 567.97            |
| 34        | gen ~1000 | 3     | 985.57        | 27.30       | 358.57            |
| POP6      | ctrl low  | 1     | 63.63         | 2.13        | 63.63             |
| POP6      | ctrl low  | 2     | 63.63         | 19.33       | 63.63             |
| POP6      | ctrl low  | 3     | 63.63         | 2.08        | 63.63             |
| POP6      | ctrl low  | 4     | 63.63         | 6.72        | 63.63             |
| POP6      | ctrl low  | 5     | 63.63         | 15.05       | 63.63             |
| RPL3      | ctrl high | 1     | 303.20        | 20.24       | 303.20            |
| RPL3      | ctrl high | 2     | 303.20        | 412.72      | 303.20            |
| RPL3      | ctrl high | 3     | 303.20        | 22.56       | 303.20            |
| RPL3      | ctrl high | 4     | 303.20        | 48.93       | 303.20            |
| RPL3      | ctrl high | 5     | 303.20        | 1,137.72    | 303.20            |

**Supplementary Table 3.** Number of sequence variants with >50% predicted change in gene expression levels obtained using the mutagenesis approach.

| region   | window size | z-score cutoff | percent mutation | increase | decrease |
|----------|-------------|----------------|------------------|----------|----------|
| relevant | 10          | 1              | 1                | 0        | 0        |
|          |             |                | 2                | 0        | 0        |
|          |             |                | 5                | 0.000013 | 0.00001  |
|          |             |                | 10               | 0.000087 | 0.000667 |
|          | 10          | 2              | 1                | 0        | 0        |
|          |             |                | 2                | 0        | 0        |
|          |             |                | 5                | 0.00001  | 0.000003 |
|          |             |                | 10               | 0.000097 | 0.000107 |
|          | 1           | 1              | 1                | 0        | 0        |
|          |             |                | 2                | 0        | 0        |
|          |             |                | 5                | 0.00004  | 0.000037 |
|          |             |                | 10               | 0.00009  | 0.00158  |
|          | 1           | 2              | 1                | 0        | 0        |
|          |             |                | 2                | 0        | 0        |
|          |             |                | 5                | 0        | 0.00002  |
|          |             |                | 10               | 0        | 0.000027 |
| whole    | /           | /              | 1                | 0        | 0        |
|          |             |                | 2                | 0        | 0        |
|          |             |                | 5                | 0.000007 | 0        |
|          |             |                | 10               | 0.000077 | 0.000517 |

**Supplementary Table 4.** Experimental validation (Methods M6) of designed sequence constructs with the mutational approach (Methods M3). Relevant positions were determined at window size 10 bp and z-score cutoff of 1.

| construct | bin       | strategy | mutated sequence size, % | batch | predicted TPM | avg. 2pddct | qPCR inferred TPM |
|-----------|-----------|----------|--------------------------|-------|---------------|-------------|-------------------|
| 3059399   | increase  | relevant | 5                        | 2     | 555.58        | 65.11       | 59.21             |
| 3080857   | increase  | relevant | 5                        | 2     | 645.09        | 86.43       | 62.81             |
| 3438152   | increase  | relevant | 10                       | 2     | 635.45        | 113.70      | 67.41             |
| 3480767   | increase  | relevant | 10                       | 2     | 544.09        | 48.97       | 56.48             |
| 8207535   | increase  | whole    | 10                       | 1     | 541.38        | 1,689.55    | 273.57            |
| 8248101   | increase  | whole    | 10                       | 1     | 564.84        | 975.18      | 183.82            |
| 3000527   | decrease  | relevant | 5                        | 2     | 119.88        | 165.75      | 76.20             |
| 3529331   | decrease  | relevant | 10                       | 1     | 101.67        | 644.39      | 142.25            |
| 7861215   | decrease  | whole    | 5                        | 1     | 154.61        | 850.87      | 168.20            |
| 8172100   | decrease  | whole    | 10                       | 1     | 131.41        | 71.11       | 70.22             |
| POP6      | ctrl low  | /        | /                        | 1     | 63.63         | 18.63       | 63.63             |
| POP6      | ctrl low  | /        | /                        | 2     | 63.63         | 91.29       | 63.63             |
| RPL3      | ctrl high | /        | /                        | 1     | 303.20        | 1,925.34    | 303.20            |
| RPL3      | ctrl high | /        | /                        | 2     | 303.20        | 1,509.69    | 303.20            |



**Supplementary Table 5.** Hyper-parameters used with deep learning algorithms. CNN denotes convolutional neural networks, FC fully connected neural networks, and LRS learning rate scheduler.

| Type   | Parameter name           | Values           | Value range      |
|--------|--------------------------|------------------|------------------|
| Global | num epochs               | 500              | fixed            |
|        | early stopping min delta | 0.01             | fixed            |
|        | early stopping patience  | 50               | fixed            |
|        | LRS epoch drop           | 10               | fixed            |
|        | learning rate            | (0.00001,0.1)    | log variable     |
|        | beta_1                   | (0.5,0.95)       | uniform variable |
|        | beta_2                   | (0.9,0.95)       | uniform variable |
|        | epsilon                  | 1.00E-07         | fixed            |
|        | mbatch                   | [64,128, 256]    | fixed            |
| CNN    | kernel size              | [10, 20, 30, 40] | fixed            |
|        | filters                  | [32, 64, 128]    | fixed            |
|        | dilation                 | [1, 2, 4]        | fixed            |
|        | stride                   | 1                | fixed            |
|        | max-pool size            | [1, 2, 4]        | fixed            |
|        | max-pool stride          | [1, 2]           | fixed            |
|        | dropout                  | (0, 1)           | uniform variable |
| FC     | dense size               | [32, 64, 128]    | fixed            |
|        | dropout                  | (0, 1)           | uniform variable |

**Supplementary Table 6.** List of generated sequences from the final set of selected variants, where at least the promoter or terminator could not be synthesized by Twist or IDT at the time of purchase.

| construct           | sequence                                                                                                                                                                                                                                                                                                                                                                                                                                                                                                                                          |
|---------------------|---------------------------------------------------------------------------------------------------------------------------------------------------------------------------------------------------------------------------------------------------------------------------------------------------------------------------------------------------------------------------------------------------------------------------------------------------------------------------------------------------------------------------------------------------|
| promoter_TPM10_01   | AATTCATCGCCCAGTGTTTAATTGACAACATTTGCTTTTTAGAATTTTCATGAGCTCTTT<br>AGTCCAGTTTTGTATCCTTGTGTGCATGATGTATGTGCCAGATTTATAAATTGAAGAA<br>AATTTTCCACATAATAATGCGAAAAATTTCCGAATGCTTTTTATTGTGCGACAGGAACTC<br>CATATACAAGTGTGGGTCTTTCGAGAACGACGAGGGATGTAAAAAATGAGTGGCA<br>TCCATTCAAATGGATTAAATATTTGAAAGAGTAGAGAAAGACCTTTGAACATAATAAT<br>TCTTTGTTAAGTTAAGCAATTAGCATTGCTCTACAGTATAGAAAACAGCAATTTTAAAT<br>TAGTTCCTTATATATAATTTATTAATTGCGTTTATGGTCAGAGGTAAAAATGCGCTCCCC<br>TCCTTCATCGTTTTCCGATTTCTTCGTAAGTGCTCTTTTTTAATAGTATTATTGCAAAA<br>GAGGGGGTTTATTTTCGTCGTAACCAAA |
| terminator_TPM10_01 | ACAAGAAAATTTCTAAAGGGTGGTATACAGTAATCTATAGCATATAGGTCTTTGCACAC<br>TTTATTACCCATGGGATGAGATTGCATTTACTGGTAAATGTATACATCTGATTGGAAT<br>TAGTGAAGATGACTCGATTCCGTTAGTATAAATAAATTGTCATAAAGAGGTGGTATGG<br>GAAATTTTCCTTAGAAAATGAAAAGAAAATAAAGTTTTTGCTAAAATTGACGAAAATTTCT<br>TTTGCTTCTTTGACTAGTTTTTTTATACAT                                                                                                                                                                                                                                                        |
| promoter_TPM10_02   | CATTTGATACAGATTCCTTAAACTTTCTTTTACAAAGGCTATCATTCAAATATGGTTCA<br>GGAGTATGATATTTGCCGCTCGCACAGAGGCCGTAGTGGTATATTTGTGATGATATCA<br>AAGCGAAGTACTGTGTTAGAATGTACTGGCAGTATAGATGCTTCTAGTGGAGTGAAC<br>TTTATATTTCTTTTATTTTCTTACTGAGGTATTCTCTTCTTATATCTATGAGAATAAGA<br>GACCACCCTCAGCACTAATTTAATAAGTATGTAGTAATGTTTACATTCTGAAGTTCACA<br>TTAACTATAAAAAAATAGAAAATAATTCCTTGGCGTTTGAACTTTTATAATATAAAAAGT<br>TCAACGATCAGCAATAAAAATAAAAATTTATGATTGATGGCGTGGGGAAGGTGAAAAT<br>TATTTTGAGACTATTATTGAAAAATGAGTTTTTTTCGTTTTACAAAGAAAATTAGTCAAAT<br>TAAATAGTTTTTTCATCATTCTTTCA |
| terminator_TPM10_02 | TTTGAACCTGTTTTACCAATGTTGTTTGGCCCTTCTTTGGAACCTCTCTGATACCGGG<br>GTAGGTTACCGTACAAACGAATCAGAAGAAAAGACATTATAATGTATATTCCATTCCAT<br>GATCAAAGGGACGAGCAGAGAATCTACCTGTATAATTAGTATAGTGGGAAACATCTC<br>CTTAACTCTAGGATTA AAAAGGGGGAGCAAAAAAAGAAACATGAAAATAAGCAAATT<br>AACCGTATCAATTAATTTAT                                                                                                                                                                                                                                                                      |
| promoter_TPM10_03   | ACCTTACGCATCTATATGTGCTTACGAAAAGATAATTTTACAAGAACTATCTTATATAT<br>ATTCTCTCTCCAAAAACAAAACACTCAAACCGTTAGATCTATCAATGTGAGCCAATG<br>GATTTTTCTCCAACGCAAGAAATACCCACCGACAAGATTTATAGTGTCTAACCCT<br>TGCAAAAATTGGCTCTGCTTGGGCCATGTTGACGAATTTAAATTTAATTGTCAAAGAA<br>TAAAGAATTCAATCAGTTTTAAGAAAAGGACGTCTCACCCAGGAACTATAAATAAAATTT<br>ATAACATATTAATTGTGTTTAACTTTGCTATGTCTTTCTTTTTCAATTGAAAGAAATC<br>TATTTTCTCACCTCTTCTAATTTTTATTAGTAAAACAGTTTATTCTAATTCGTGTTACT<br>TTAAGAATCCTTGTCTAATATAGGCAATAAAAATAAAAACACACCACCAAACAGGAGAC<br>CGATTGTCCAATGAAGGGACCGAAGCTA     |
| terminator_TPM10_03 | TATGTTGTTTTGTTTGTCTCCATATAATAAAACCGCCATAAGGCATTCTCAGAAAGTT<br>CTTTGAAAAGTGGCATCTTGACCAATTTCCCTCAAACATGCAATTATGATTATCCCG<br>TACGCATCCCACCCTCTCCACGACCAGCCACTCTAACCATGTTTTATAAGTCGGC<br>TGATTTTGACATGTGTATAATTGCCTTTTTATTATGATAATCTTGAAATTACCATGTTATA<br>TGGAATTATACCATTCTCAATAATAAATTAGTTTCGTGATTTTAGAAGCCTGGTAAGCAA<br>ATGATTAATTCTCTGAAC                                                                                                                                                                                                         |

|                     |                                                                                                                                                                                                                                                                                                                                                                                                                                                                                                                                                       |
|---------------------|-------------------------------------------------------------------------------------------------------------------------------------------------------------------------------------------------------------------------------------------------------------------------------------------------------------------------------------------------------------------------------------------------------------------------------------------------------------------------------------------------------------------------------------------------------|
| promoter_TPM10_04   | TGTAGAACTCACAGCAACAATTTTCAGGGACAAAAAATTAAGGTAATCTTGATCCAA<br>AAACTCCAATGGAAGTATCGGAACTTTAAAGGGCCATGAGAGCAAAATTGAACAAAC<br>AATGTCTGCGAAAATTTCAATCAAACTTCTTTGTATTAGATTGTCATTATATTTATTTT<br>GAAGTAAGAAAAAATATATAACTGTATTAGAAGTTTATTGACTGTTTCTCTCTTTTTTG<br>TCGGACCATACCTTTAGTTTTCTATCGTTTTTTCTTTTTGCATCTTATTTCTTAGCCTG<br>TCGTTCTACTTCATTTATTTCTTTATCTATAAAAGTCTTTTTGCACGAGAACCATATTATA<br>AGGTACTATTCAGTAAAATTGATACTTATAAATGCCGAACTTTTA                                                                                                                 |
| terminator_TPM10_04 | AGTGGTACTCTAGCATGCGTACCATTTCTTCGATTATATCTTTTTCTTTCTGGAGATGC<br>GCTTATTCGGTCTGCTGTACATTGAAACAAGGATGTCACGCTAAAAAGAAACACTG<br>TTATACTGATATGGAAAGGACACGTTTGCTATTATTTGTCACTTTTATGCTTTATTTG<br>ATAGCAGAATGAGGAAAATATTCCAATTGTGGATATATAAGTGAACAGAGATGACCA<br>TAGTGGATAAAAGAAAATCGAAGAATTTGTTTAAAAAAGCAGAGTTTGGAAAGGGG<br>AAGTTGATCTGCTAGCAGCATTTCACAATGAAAAAAGGCTTCTGCACGAAGAATTG<br>TGTGAGAAAAAATAATATCAATCTTCCATACAATTCAGTAATACCCAATATACAGAAT<br>TTTGGAGGAATGAATAAATTTGTTTATATCAAAAATTTATTTCATCGCTTAATACACCT<br>CAATCAATTACAATCAGGAACATCTATCTTA            |
| promoter_TPM10_08   | ATTTCACTTAAACAGAACACCTATAATTGAAATGATGTTGTTTCGACGACGCGTGCGC<br>GCTCCTTATACCGGAGTAGCTGTTTTGTATTTATAACTGTAGAAGTTATGTGAACCTT<br>ATATATAGCTTGCCTCCAAAATCTCTAGATGTTGATATATCGGAACCTTGATCCAGATG<br>TGAATCTACAACCTAACGGTTAGATTTGGAGTGGATTCCAAAAAGAAGACGGTGCC<br>ATACAAATTCGAATATATATTTAGGATTAGACTTATACGTATGCAACTCTATTTTGTGTA<br>TCACACGCGATCAATAGAGAAAAGAGCACCGCTATCCCCACTCCAAAGTAAACGAC<br>ACTACACATCAGATCAAATAAGATATTTAAAAACAATGGAATCTTTAGATTTTCATTTTA<br>GTGTATTAGAAAGACTTTGCGGACAAATAGAAAAGGAAAAGCAAACAAAAAAGAAA<br>AAAAACAAGAAGTTAATCTTTGTCAACGCCAAA      |
| terminator_TPM10_08 | TTTTTTGTGCAAATGATAAGTATAAAGCAGTGGGGGCTTCATGGACGGTTTTGTGTT<br>GAAAGAAGGGGAGGTATTTCTGCTACTTTCTAATTTTTCTGACCATTTGATAGCATAG<br>AACACCTCCATCACACTAACATGTATCAAAAAAAGAAATTATATCAGATATCAAAGGA<br>GTTTGAAATGATTTAACAAATTTACTCCTTGTAATCTTTGTATTCAATTAATTTAATT<br>TTTTCTAGCTATAAAAAACA                                                                                                                                                                                                                                                                           |
| promoter_TPM10_09   | ACTTTGAGAACACTCAAACCTGACGATTGAAAATGTAAGCCTTCACGTCATCACGATC<br>AGCGAAAGGAGCTGTTGTTATGAACATTTTAAACACAGATGATATAAATAAAGAAGT<br>TAAAAAGTTTTTATTATTTCTGTTTACTATATTTTTTAGCATTTAATTGTAAGTAACAGG<br>GAATTTAATAAACTGGATTGATGGTTTATATACTACTTTTTATATTTACTAGAAGTACG<br>ATAGTTGAAGTCGTATAAACAATACTTTTCCCTTTCTCTCAATCTTTGCTTAATATAG<br>ACCACTCGAATTCCTGAATTAATTTTTACAACCTTTCTGCTGTTAGATCAAAACGAAAA<br>TAAAAATAAATAAAATGTTCAAACAGCGTTTCAGTAAAAATTA                                                                                                                    |
| terminator_TPM10_09 | TAACCTTTGTCTCTCGGCAGCATTTCGGCAAGATCGGGGAAGGTAGAAGAACTACG<br>AACTCACAATAAAATTTCTCCTAGAGAAAAACGCAGAAATACATGCGAAATTATTACT<br>GCAACCCTTCGGCATTACCCCTGAAACTTCATACCCCATCATTGCCGCATCCTAACCC<br>AGTTCATATAAAGTAGAAAATGACAAATGACACCTTTCAATTGCAGGTCATGATAGAA<br>GACTGTGGGCGGACATTACTAGCCTGTTGACTTCTTTTCTCTGTAAAGAAGTCTTTA<br>AGGAAGGATTCCATACTTGCACCTTTTCTCCAGTAAAATTACTCATTTCGAAATTCATG<br>ATAACCAACGGTCTCAATTCATGGTGCCTTTTAGGAAAGGAGGAGTATGAAGAGACC<br>CAATCTTCAGCTGAACACGTTGAAAACCTTAACAGAATTTAAGTAAGGAAAAGAATCAA<br>AAAATACATATTTAATTAATTTGTTAATAATACATAACC |
| promoter_TPM100_02  | AAGCTTATTATTATACGGAACAAATTTCTTATCGAGAAATCTTTTGCGGAAGATTAC                                                                                                                                                                                                                                                                                                                                                                                                                                                                                             |

|                      |                                                                                                                                                                                                                                                                                                                                                                                                                                                                                                                                       |
|----------------------|---------------------------------------------------------------------------------------------------------------------------------------------------------------------------------------------------------------------------------------------------------------------------------------------------------------------------------------------------------------------------------------------------------------------------------------------------------------------------------------------------------------------------------------|
|                      | AGGAATTTGATGTTGTATATATTGAATAGTACAATCAAGATCTTGATCTATTTAAATATG<br>CATACGCATCGAAGCAATTTTGATGAAGTTATTCCTAATTAGTAATTGTTGCTATAAAC<br>CGTCGAACGACTAGCCGAGAGGAGCTCAGACCACAGGCTGTTAATTCTAAGGGAAA<br>ACTAGATATTACACTAAAAACGCCTCGACTATAAACTTGACATATTTTTTGATTTTTTC<br>GTCTGGTCTATGACTTTCTCGATTGCTTTTTTCCCCCAAGAGATTAAGGTGAAAGG<br>AGATTTCAAATACGATAACCATTAAGAAATTAGTTGAACAATACTACTAAGAGTACCAG<br>ACAATA                                                                                                                                           |
| terminator_TPM100_02 | AATCTGTGATATTTATTTTTGTACCAATATTAGGTGATTCTATTTTTCTGATTTTTTAT<br>ATAAATACTAAAAAGAAGTTGCAAAAAATAAAAAAACTGACAGGTAAATGCTGCCA<br>GGATAAATAATCTAAAAAACTTTCTAAGAAGTGAAGAAGATGTAATGTATCCTGAA<br>GTAAGGCGATATAGAGGAGAAGGAGAAAAAATCATAACTCATAAAAGATGGCTAAAA<br>AGTTGCGGAACACCT                                                                                                                                                                                                                                                                   |
| promoter_TPM100_07   | CTCAACTCTGTTTAAAGTTCTCTCTCAATCGCTAAAAAACTTTTCGAGTAGTGATG<br>GCAGTGGCGTAAAGAAGAGATGGACCGGCCATAAGCACTAAAGACCAATCCAGACG<br>GTCACACCAGAAACGAGAAAGCTGAAATTACCCGACTCTACTATACAAATCAGCTTT<br>CATTTACAAATAAAGGTAGCAATGGTAAACCATGAAATCACGCGGTAGCTACGGATAT<br>CCATTACACCGCTATCCAATATGATCTGTAGAAAGGACTAATTTTTTCGCTTTTACT<br>AATAGTACTCGCTATTACTACTTACCTCTGCTTTTTTTTCTAGTCAGAGCCAATGTGGT<br>ATTCAAAGTTATTGCAGTGCATTTGCGTGGACTGCAGCAAAAGTACCTTACAAAAA<br>AGGAAGGAGAAGTGTGTGAAAGGGGCATCATACTTGAGTAACCAAAAACTGGGT<br>ACTTGAAACGCACTATACTGGAAACGAGATAA |
| terminator_TPM100_07 | GGTTAGACTGATTAGATATTATGCTATATTTTCATGTTGGCTGACTTGACACTTATTTAT<br>ACTATTACATAATATATTACTACTTTGCCTAAAATATTTGTTTATGTGGGGTAAGAAACG<br>CTCGTAAATTTTCTATGAATCATCTGAGCGAAACCTTAACTTGCCTTATTAGGAGA<br>AAAAAACGAATTATGGATAGAGTGGTATGGCAAGCCGTTTCGATGACCCAAATGCG<br>TCTAAACGGTGGCCTATAGTATGAGCATTCAAGGATTACAAATGCGGCACCAATT<br>GTTTGAAGGATGCACGGAGTGTGAAATAAATGATAATGTCCAAAAATAAAGATATG<br>TATTACAATGCA                                                                                                                                           |
| promoter_TPM100_08   | TTTTGCAACCAAGCCTAAGCAAACGAAAGAGCTCAGAGTTAATGAGCACTTTTTCTA<br>ATTTAAAGCCTAGTAGTGTGTACTTCGCTCAAGTAATCGTTTTACTTTTAGTGACACA<br>TATAGGTTAGTTGCTAGCACTAGCTGAAATCAAATAAGGTGTTAGGTACGGGACATAT<br>AGTTGAATCAGCTCAACTCTCACGTCTTCAACACCGAACCACGGCCCGAAGTCATG<br>GCACCTCATTTATCACCTTTGACCGTCACACTTCAAACATACAGCGGTTGGGCAA<br>TAACAGAAAACCCCTTACATTCTTGTTTTCTTATTATCACCACCAAGATTTTCA<br>TCCAACCTCAAGATCAATTCAAGAGTTTGTGATGACCGACAACTAAAGAAGTGAACA<br>ATTA                                                                                           |
| terminator_TPM100_08 | AGAAGAATAAAAGTGAAGTTTTTGGAGCTTTGTTGGTATTTTCTTCTTGAGAAAAGG<br>GTGTGCCTATGTAGCTGAAAATTATGGGTAGGACCATAGGGAATTTACCTGATGCTTC<br>AAGTGCAATCTCGCCTATGACACATGAGCACTTAACCTGAGGCAAGATACACATCAA<br>TAATAGGCTTCTGACTTATCTTTTCGATTATCAATCCATCGTCACATTCTAGCGCAAAGT<br>TTCAAAAAATTAATATAGTGCTATGTGCGATGGTATCAATAT                                                                                                                                                                                                                                    |
| promoter_TPM100_10   | TATAGTTTTAAGCTGATTGGATACCAAAAACTACCATTTTATTAATGCCATGGAATTTG<br>AACGAATCATTTTCGATAATAGTAGGCGTGAAGGATACGTCCCCAGTGAAACGAAGGA<br>CAGAATGAGGATCAAATTTTCAAAAGGTGAAAAACAATAAGTTTAAATTTACAATAG<br>CTAAACATGATTTTTCCTTTAGTCCAAAAAGTCTAGTGTGGCTCTATTAGTAATGATTTA<br>TTGTTTTTAATAACGCCTACTTCTAAATGTCTGACCAATATTCCTTAGAGAAAAAAA<br>TTGAGTAAAGGAGAGAATTAGAAAAAGAAGGGAACGTATGACTTATTTGATGAAATG                                                                                                                                                      |

|                       |                                                                                                                                                                                                                                                                                                                                                                                                                                                                                                                                                  |
|-----------------------|--------------------------------------------------------------------------------------------------------------------------------------------------------------------------------------------------------------------------------------------------------------------------------------------------------------------------------------------------------------------------------------------------------------------------------------------------------------------------------------------------------------------------------------------------|
|                       | ATGTAAATGAATTGTCCATTTTTACACATAAAATAAACTGAGCAGCCAAATCGTAGCATC<br>GCAAACCACCA                                                                                                                                                                                                                                                                                                                                                                                                                                                                      |
| terminator_TPM100_10  | AAAAACTGAGATTATACTATGTAAGTTGATGCATATAAAATAGTAATAAGTATCATTTTTT<br>ATGTTGACTTTGATATATCATTTTTCGCCTTTGGCTAGAAGCGCCAACAAATTTATAAAG<br>GAATTTTCGTATGAATTACTTACCTATATTTAAGTTTTGTCGTTAAATGAATTCATCGAA<br>AAAATATAACGATATACTTTGTGATAACAATTGCCTTGTCTTGCCAATGGAACCTAAAT<br>TAACACGTGAAGAGTTTAGTAGTTAGTTGATTGGTAAATAGAATAAAAAGGGATACAGA<br>TTGTCACGTAAACAAAAAGATAT                                                                                                                                                                                           |
| promoter_TPM1000_01   | AGAAAAAAAGGTGGGGAGCGGCTGGAAGTGCCTTATCCACCCATATGTATTTGGT<br>ATACCTTACTTTTTGTACCATATTTCTGCCTCACCTAAGAAAAACCGATTCAACAATCC<br>GCATATTGCGCAGTTTTAGGGGTAATTGCAATTGAATCTTGCGAACAAAGCCACCA<br>TACCGTTCATCAACTCCATCCGACCGTAATTCATAAACGCATGATTCATCGTACATTT<br>TATCTTTGCAGAACAAGTGATTCCTTTTTCTGCAATCCGTCCTTGTGTCATCATTCCC<br>AGCCGGTTTTCTACCCCGGCTTCCCTCAAGAAAGTAATAAATTGGAAAAATATAAAG<br>AGATAACGAAATAGGGTAATGACTTTTTTGTCTTAGCTTGATTAATTTACAAATCAA<br>CAAAA                                                                                                |
| terminator_TPM1000_01 | TAATATAATTTTTTTTCATAAGGGAATAATTATTTGAAAAAATCAAATCGATGAAAAACA<br>TGATAGTAACATAGGAGAAACATATATGTAAAGGTAAATTAGATTTTTTATATTACGTTA<br>GAGTTTTTCCACCTCTCCATATAAATCTCTTTATATATGATTACAGATTTATTATAGTTC<br>GTCAAATCAAGAACAACAACAATCGTTCAATGTATATAAATTTAGTGCATATATAAGAT<br>AAAGAAATTGAAACCTATTTATAGAGGGCTGTGTTTTTCACTTTCTTAAGGCAGGCCT<br>TTATTTATTGTATTTCTATATATACATAGGGTACTGCTTGTGGCATGCACTACCTGTGCG<br>CAAAATGGAAGAGATAAAAACGATCCGCAGAATTTCACTTTTCAAGATTAATTTGTGCG<br>GGTACAACACTTTGACTAGCATCTAAAAACTTTTTATTTATTCATGACTTCGTCCTG<br>TAGAACAGCAACTCCCTTGGCCG |
| promoter_TPM1000_06   | ACTAATTTTCAGCTATACCGTGAATGTCTGGTCTTAAGCACCATTTAAATCGAACATAC<br>CGAACACGAAAAATAAGAATTTTTAAAAGTGAGTCAACACAAATAACTGAGCTAAATT<br>CATCACCTCCTATTTCTCCAAGTGAAGTGTGAAAGTTGCACACGGAAAGCCCTTGC<br>TACAATTCATTGTTCTTTACCCGACTGCTAAACTTTGTATAAAAATAATGCATCCCAT<br>CATTCAACTCCTTCTTGTCAATTTCTCCCGCATTACTCGCACTTTTCACTACAG<br>GTGGGAATGGGCCACGTTTCTCACCCCAAAGAAAGGAAAAAAGAACGATATATAA<br>AACTTGATAATAATGTTGTTCTAAGTTTTACTAATTTTTGTATGTTCTAATTTACCAATA<br>AAGCAAAAGTAGCATTAAAGCATTATATTAATTAATTAGGTAGATTAAGATTGGAATACA<br>TTAATTAAGTGAACAATAACATAACAAAACA      |
| terminator_TPM1000_06 | ATTTATAGAATAAATATTTATAAATACTTAGTTTTGATTTAGTTAAGCAATTATAGTTTATT<br>TTTTTAAATATATTAATCTATTATATAAATATATTTTCTAATATAGGAAAAAATCTTAAT<br>AGTTATACTGGTATAACTTATGTTAGCACGGGTTGAAAAAAGAGTAGTTTTTTTGT<br>TTATTCTTGAATTTTACACTATCAGTAGTCTGAATATCGGTGCAGTCTTCAGACAACAA<br>CTACAACGACCCACAATTTGTATGAAATTTTTTATTATATGGCCTATTGGCAGCTCATC<br>AAAATACTCCTTTTCGTGCTATCATAAACCTATTAACATCATAATG                                                                                                                                                                       |
| promoter_TPM1000_08   | GCCCACTCATCACTACTTTAATCCCCAACCACCATCTGAAGGTCCAGACAACCT<br>CGTTTAAACACAGAATTGATACCATAGCTGCATGGACAATCACGAAAAAATCACCT<br>CGAATTCCAAAGTGGTCGCCCTTGAGGCAAAACAGGAGAAACAAACGAAAAAATTT<br>AAATAAAAAAGTTATATAGATACTACCCCTAAAAACTTACCCTCTTATCATAATGAATA<br>CTAGGCTTGATAGTCTCCCTATCCCTCCCCATTATCCGCCCTTTTGCACGGCGGG<br>GGTCATTTCCACCTTTCTGTGTGCTGAACATTTTTTTTTCAAAGCAAGGTGAAAAAGT<br>GTCTTCCATAATTTTTTGTATTTTCTTAAGTGTGTTTTTCAAAGTACCACATCC                                                                                                                 |

|                        |                                                                                                                                                                                                                                                                                                                                                                                                                                                                                                                                              |
|------------------------|----------------------------------------------------------------------------------------------------------------------------------------------------------------------------------------------------------------------------------------------------------------------------------------------------------------------------------------------------------------------------------------------------------------------------------------------------------------------------------------------------------------------------------------------|
|                        | AGTAAGATATTTCTCTATTACCATTGAAAGAGTTTAATTTTTAAGAATTGTAATAATTATA<br>AATACACCAAACCATAAAAAACACTAAAAAAA                                                                                                                                                                                                                                                                                                                                                                                                                                            |
| terminator_TPM1000_08  | AGTTTTAATTTGTCTTTATAATAATTTGTCTTTCAAGTCTATATATATTTTACTTTTTTTTT<br>ATCTTATTTTCTAAAATTAATGATTTTGTCTATGTAAAATATTAGGTATATATATTTTTTTTA<br>CACATTTTCAAGTCTTTTCTATATAAGTATTAATTATAAGTAACATTCCATCTTTTCGTT<br>TTTTCTTATATTTGTCTTTTTTTTTCCCTAAATTTATTTTCATTTATCGGCCAATACCCC<br>AAGGAGCTCCTTTGCCACACCATTTTCATCCAGGAAAAGTTATACTACGCTGAGAT<br>ATCTTTAAGACTTTTTGGTCATGCCTCTTATGTGCAATCATGAA                                                                                                                                                                |
| promoter_TPM10000_01   | TATTGATACTGGCGGGCGGCGCTTCAGTAATACACCCACGACAGCGCTACCATGTA<br>GAAGAATACAATCAGGTGTGTGTTGCCATAATGCTACTCGAATAACAAAATCCATTTA<br>TATCTTTTCAATTTATTATATTGTATCTAGTTCTCACGTAAACAGAATTTGCGTAAAACCTAT<br>ACTACAAAACACAAGAAAACAAGAATAGATTTTCTTTCTAACCGTTCACCCGCTCAA<br>TAAGAAATATTCCAATATTTCCCACGAAACGTCCCCCACCATCACCCCTCCTCTTT<br>TTGTAATATGTTGTTATATTATTTAAGTTGTTAAGTATCTTTCTTTCCATTTAATTTAGTG<br>GATTATTTTTTCAATTTGTTACATTTCTTTTGTCTTTTGATTTTTCAACTCAGCTAACT<br>TATTTTCTTTTTTATATTGTTTTTCTTGTTTTATTTTTTTACAAAACAACCCTTTAC<br>ACTCAACTATAATAACAAACAAA   |
| terminator_TPM10000_01 | AACCAAACATACATTCAAGAAAAACATATTAATTTTTTCTCCCCTCTATCATTTTCTC<br>CTTTCTTAGAAATGGTTAGTAATGTATTACTTCTTAGAAGGAGTTTCTTCCATTTGTTT<br>CTTCTTTTTCAATTTATTTCAAAGAGTAGTTTTTATTTATTAATAATAATTTAATT<br>AAATATTTATAAAATCGTCAAGAAGTATAGATAAAATCATTAAAGAAGTCATTTACACATAT<br>GGAAAGAGAAATTTCTAAGGTTTTATGGTAATATTTTTGAATAAATAGTTAATAGGTTA<br>GCCCAATGGAGAGTAGTGGGCTTCCGTTGGAATTGAACAAATTTGGTACTCCTTAGTG<br>TTTGTTCACTTATTTTGCATTTTATCTGCAATTTGCACACTGATTTTTTTGCAATCAA<br>AAAAGAATAATGGGCTATCAGCGATCAACTAATAATAATCATTACTGTGAAGGTGCT<br>CCTTTTTGGTACCCCATCTTGGTT  |
| promoter_TPM10000_02   | AGAAAAGGAAGACGCCATTTTTGAGCCTGCGATATCCAAATTTCTTCTACCCATTTT<br>ATAATCCGCTTAAATGAAATTCAGTCATAAAGCCGACAGGAACACACAGAGGCGCCTA<br>CCCCTAACACGTCATCTTATCCATGCCTGTATTGACCTCCTCAGGCAACTATTTTGA<br>CAATCCCCAAACAATCCAAACACCCAAAAGTAAATCGACCATTGCACTTTTCCAACAT<br>TCACGCCGAAATTTCCACCCTTCCCCCTTCTTCTTGCCCTCCTCCTACCTTGCGG<br>GACACCCCGCCCTGCCCCCTTGCCATCCCTCATTCCCTCAATTTAATTAATTAATTTG<br>ATAAATTTTTGTTCTCATTTTCTATTGTGTTTTCTTTCTTTTTTATAAATACTTTTCC<br>CATTAAGATATTCTTCTATTATAAAGAAAAGTTTTAGTTCGTTAATTTATTTTTTCAACT<br>AAGTATCAAATAACCATACGAACAAAAACAA |
| terminator_TPM10000_02 | AGTTAATTTATTTATTATATCTTTTTTTTATTAATTTTATCTTATTTTGAATATGTATAT<br>TTTAAATAAAGATTACTTTTTTATTAATTTGAAGTGAAGTGAAGGTATAAGTTATGATTCT<br>TATTTCCAAGGTGCTTCTTTGCCTGAATCAATAAAAGCAAAGGAATTTTTTGCATAC<br>TAGAAGAAATTGTTGCCGATACCAGCGATGCGGATGATCCGCAAACCTTTTTGTTA<br>ATCTTTCAATTATGGTAATCAGTAATTTATACATATGAGGGTGTACGTGGGAGAAACT<br>TTATTATTTGTTTTTTGGGTTTCTAGCTAATAGAATGATTTTCTTTGAAG                                                                                                                                                                   |
| promoter_TPM10000_03   | TTTCATTCCGGAAGACGCGTTGAACAGTAACTTGCTCATCCAAACACCCCGCATTTT<br>CGTTCCTCCAATCAAGCCCCGTATGGTAATAACAGAAATTTAAAAGAACTGATCGTT<br>TAAGAATACACACATATTCGGCAAAAATAAGCCCAATGACTAATCTTAGCCTTACACCA<br>AAAGACCTTATAGTATAGTTTAAAAATTTAACCCCTCAAACCTATTCTCAATTTTGA<br>CTTCTTTTGTTTTTTTCGTCTGCTCATACACTAGGCCCCCCGCCACCATCAGGCTCC<br>CACACGCAGGAATTTTCACTACCTCCCGTTGATTTCGATAAAAAATACGAACCTTATTGA                                                                                                                                                              |

|                        |                                                                                                                                                                                                                                                                                                                                                                                                                                                                                                                                                    |
|------------------------|----------------------------------------------------------------------------------------------------------------------------------------------------------------------------------------------------------------------------------------------------------------------------------------------------------------------------------------------------------------------------------------------------------------------------------------------------------------------------------------------------------------------------------------------------|
|                        | AAGAGGAAAATTTTTTTTGTTCCTTCATTTTTTCCTTCTTTTTTTTACACCTTTCTCCC<br>AATTACTTATCTTTTTCTTTTTATTATAGGTAGTATATTTAAAGCAATTATTTTAGGAACTAT<br>CTAAGAACATACAATCAAATAATCAAACA                                                                                                                                                                                                                                                                                                                                                                                    |
| terminator_TPM10000_03 | TTCCAACCCACAGATCGTATCCACACACATTTTTATTTTTTTCATATTAAGCAAGTTTC<br>ATCAATATTTTCAACTCTTATACTTAAGTAGTTATTATTTAAGTAATACGTAGTCCCATT<br>TCAAGTTTGAAAAGAATTAATCAATTTAATTAATAGTATATATAAGTTACTTTATTTCTAT<br>TTTTAAAGATTATTATATCTTTAATTTTCTTAGTATTATCTATTTAACTTTTGTAAACAATGT<br>GGTAATTGTGGTAAAGAGTTTTTATACTGATGTTGCCTTGTTGTTGTGTTTTTCATTGTG<br>AGTTATAGTTGTTGCTTATTTCTTTTTATTTTTTCTGTTGCATTCTGGCACTGACCTG<br>GGAGGAAAATCAGCAAATCCAGCAAGTCTCGAATATTTGCGAAGCTTGTCCACAAAAG<br>TGTTCTGATGTAGATTTCTTTTTTGGCGTCTAAATAATGGTCACGATTGGCCACCT<br>GGCATGATTGTGCTCCAGACTGG |
| promoter_TPM10000_04   | ACTTCTCCTTCATTTTTTGGTATTGACAACACTTCAAATCAAGCCACATACACAGTAC<br>ACCGAAAAGCCATATCCGGAACGTCACCCGTACAATCCACTTCTTTTTTCCATTATTA<br>TATGATACCTTTCCGGGGCATAAAGGAATCAGCCCCTATACGGTTAGTATCCCAAGTC<br>CATACATACACCCCGAACATACGAAAAAGCGTAACACATAATGCGCTACCCCAA<br>AAAATCCGACCGTTAACCACTCCCTTCCAGGGAGGGAAAAATGGGGTGGCAGCCCC<br>GTCTGCCGTTTTTTCGCATTTCTACCTTCTCCCTCGGGTGAAATTATTTTCGAGAG<br>AGATATAAATTTTAGTTAGTTGTATGATTAAGTTCTTTATTTAATTTATTTCTACTAATC<br>TATTTTTCATTAGCAATACAATTAATAAAGTAGTTTTCTTGTTTTATTAAGTTAAGCAA<br>TTATATATAACAAACAAAAACGAACAAAAA          |
| terminator_TPM10000_04 | TCATTCAAAAAATATTCTGTTCCCACTTATTTGTTTTTTAATCGCAATTCTCATCATT<br>TTCATATATTTTACAGTCTTATCTAGTTTGAATTTTTATTTTTTTCGTTCCATTTTTTGT<br>TCTATGTTAAATAGTATTAATAATTTATTGTATATATAAATAATATAGATTTAAATCTCTT<br>TATTAGTATATAATTACCTGAATAAGATTATATCAATTATATATTTATAATTAAGTTACTTGT<br>ATTTGTTAGTATTATTTTTTCTTTTCTGCTTTAAAGAAATTGAAGTTTTGCATGGTTGT<br>AGGAAGTTGGGTGTGGGTGTTGAATTTTTTGTGCTTGCAACCAGCTGGTTGGCTTT<br>TTCATTGCACTATCGCACTATTGGCTGTCAGCATTACACATGCGAAATTACAACAACC<br>AACACACACGAACGACTACAATCATCACACATCTCATCATTATAATGGGCGGAGC<br>GGACACCTTTCCACTCCTCAT        |
| promoter_TPM10000_05   | AATCGATCCTCATATTCCTGGCGAAACACAAGTCCAGCCAATAACGCTCTTTGAAA<br>ATTTGCTAAAAGTACTTTGTTGAAAAGTTCAGTCTATACAGTACTCCCAGT<br>CCTCCTCTGCCTTGTGGCAGTACTATTCTACACTACACTTGTGGTTAAAAACTCG<br>GGCTTCTCCTAAGATCAACATTAGTACTGAACATACTAATAAGCAAGTAACCCACGC<br>GTCTACCCGTGCTTTGGCTGCCAACGCGAACGCTTCACACGGGACGGGCCAACCC<br>CAAGCGAAATTCATTAGTACTTCACAACTTTTGAAGAGAAAAATCTTATTGAAA<br>AGCTTGATTATTCAATTTTTTCTCCGTTCTTCTTCTATTATTTGTTTTTTTTTTCATTA<br>ATTACTAATCTTCTTAGAATTAAGAACTTTATTTAATTATACTTATTTAGTTAAGATACA<br>ATACTTAAGTACACAACATAATCACAATCAACAA                  |
| terminator_TPM10000_05 | AATTTTTAACTATTTATATAATATAATTAATTTAATTAATACTATTATATATATATATTATA<br>AGTCATTTTTATATTATATCGTATTTTTGTTTTTGAAGTTTTGCGAGATGGGGTTGTCTT<br>CTAAGGTGATGGAAGGGCAGAATAAAGTGGCAATGTAATATTACAGTACTATAAGAAA<br>CAATCGCCTTGGGAGTGTGTGCGCTTTGGTGGCGTGTCTTACAATTTTTATTAATT<br>GATCTGCTCGTCCCTATATTAAGCGCACGCAACTCATCCTACATTCTACTTCTTTATTT<br>TTTTCTCTGAATCTTGGGGTTCGATATGCGACGACCCCAA                                                                                                                                                                                |
| promoter_TPM10000_06   | AAATATAGGATGGTCCACTTGGGGGAAAAGAGGGTGGCCAACGATCTGATTTGCCAA<br>ACTTTTGAAATTCAATTTCCAACCAAACGGAAGTGGTGATTTGTTTTAAGTTGAATTT                                                                                                                                                                                                                                                                                                                                                                                                                            |

|                        |                                                                                                                                                                                                                                                                                                                                                                                                                                                                                                                                                        |
|------------------------|--------------------------------------------------------------------------------------------------------------------------------------------------------------------------------------------------------------------------------------------------------------------------------------------------------------------------------------------------------------------------------------------------------------------------------------------------------------------------------------------------------------------------------------------------------|
|                        | TAATAATTTTTGCAAACCTAGTTTAATAATAATAATTAACATAACTTCTATGACCATCTT<br>GCTATCTACTTCCCTTAGTTCCTTTCTATTTCCACAACTTAATACGCGCATTCTTTA<br>TTTCGTTTACCGCCCATGAGCAAATGAGACCGTGAAAACGTTACGCGGAGTGCACA<br>CCGTACCCCTGTCAGAAGTAGTTTTGTTGCTTTTTAAATAATATTAATATGAAAA<br>GTTGGTATGGTTTCTTGTTAGAACTTTATTTATACTTAGTTATATTTTTTTTCTCTACT<br>ATTTCTATTTTCATAGTTTTATTAGTTTTATTTCTTTTTGTTCTACTTAACAACTCAAC<br>TTTTTACTATTACAAACGAACAAAA                                                                                                                                            |
| terminator_TPM10000_06 | ATCACATTAACATAAAAGGAAGATATTCTATGATTAAGGTA AAAATTTCCCTCATGTAT<br>ATATGACTTTTTTCGAATGATTTTCATTTTTAAAGGCTTTTCTTCTTCCCTAGTTAGTTAT<br>AATAATAATTTCAATTGTAATCAATTAGAGTGTGATAAGTTTAAAGTTCAATTAAGTATAAT<br>TAACTAAGTATTAGTTAGTAATTATATATAATTAAGTATAAAAAATAAGATATATATTAACG<br>ATTTTTTCATTGGCCTTATAATTTTTTTTTGGTCATTGGGAAAAATGATGAAGTTTGCTTA<br>AATTACATAGGGATTGTGATTTGGCAGTGTTCATATGAGTCCAAAAAGGTGCTTTGG<br>TCAATTGATACAATCCGGCCTCGTGGGCTTTTCAAATAGCTTGTGTTAGCTTTTCATTA<br>ACAGCTAAAGTCATTTTTGGGTAGTAGTCTGAAATTTGCATCCCGTATCTGGGTCATG<br>CAATGGCACCCATGTTTCTTGT |
| promoter_TPM10000_07   | AATCGATCCTCATATTTCGCTCCCGAAACAGAAGTCCAGTCAATAACGCCCTTTGAAA<br>ATTTTCGCTAAAACGATACTTTGTTGCAAAAAGTTCAGTCTATACTAGTCCCCAGT<br>CCTTCTTTGTTTTGTTGGCAGTTGGTATCCTACACCACACTTGTGACTTAAAACTCA<br>GGCTTCTCCTAACATCAACATTAGTACTGAACATACTAACAAAGCAAGTAACCCACGC<br>GTCTACCCGTCCCTTGGCTGCCAGCGCGAACCCCTCACATCCGACGGGCCAATCC<br>CAAGCGAAATTCATTAGTGACTTCATAACTTTTGAAGAGAAAAAATTTTATTGAAAA<br>GCTTGTATTTATTCATTTTTTCTCCGTTCTTCTTTTATTATTTGTTTTTTTTCACTAA<br>TTACTAATTCCTTCTAGAATAAAACTTTATTTAATTATACTTATTAGTTAAGATACAA<br>TACTTAAGTACACAACATAACACGATCAACAA              |
| terminator_TPM10000_07 | ATAATTTTTAAGTATTTATATAATATAATTAAGTTAATTAATACTATTATATATATATATTA<br>TAAGTCATTTTTATATTATTATCGTATTTTTCTTTTTGACTTTTGCAGATGGGGTTGTC<br>TTCTAAGGTGATGGAAGGGCAGGATAAAGTGGTAATGTAATATAAAGTACTATAGGA<br>AACAATCGGCTTGAAGTGATGTGCGCTTTGGTGGCTGCCCTACAGTTTTTATTG<br>ATTGATCTGCTTGTCCCTATATTAAGCGCACGCAACTGATTCTACATTTTACTTGTTTA<br>TTTTTTTCTCTGAATTTTGAATGCCATATGCGACGACCCCAA                                                                                                                                                                                      |
| promoter_TPM10000_08   | AATCATCATGGTGGATTAGTAGTTTAATTAAGCAATTAAGTACTGATGACAACCTC<br>AGGTAACAAGATAAACAATTTAATTTAGTTAGGTTCTATCCTATAAAAAGTTTTTAAATA<br>ACCATGATCAAACATGTTTGACATGCGATTTTCACTCCATCTTTCCCAATTAAC<br>GCATATAAATAATCAACCATATACACCAGTCCGTAATTTATTTGCAGAATTATCACGAA<br>CATAAAAAAAAAAGAAAGTATCAACACCACACATACCATCATGAAAGAAGATTCTTCC<br>CAGCCGGGTTTTTCTGACCAACAAGGATTTAGATAAATTGAAAAAGTTTTTTTTCGAT<br>TTTTACTCTATTTTTTTTTAATTATTTTTGATTAATTTTGTCTTATAAAAATTTACTTACTTAT<br>CATCTTTTACCTACATTTTACGTATTTAAAGCTTTTCAAATAGTAGACATCAAGAATAT<br>CTCACAACATTCAAAAAATAACAA           |
| terminator_TPM10000_08 | ACATTAATAAAAATAACTTTTTATAATTCGTTTTTCTTTTTTCTTTTATAGTTAATTAAGTA<br>ATTTAATAAATTCGTTTTGATCGTAATTAATTTTTTCCCTCTTTTTTTCATTAATGAAG<br>TTAGTAAGTTATAAAAATAAACTGTATATCTATTTATAGCTTTTTTAGTATGTAATTTTTT<br>TTATTTATCTTTTAACTACTAACAACAAAATTGTAAGACTGTTTAACTATGAAGCAGGA<br>AAATAGGGTAGGAAACCAATATATAGTGTCTTCCGAAGTCTAATGAAATCACGGTG<br>GCATGCGTGAGAGAGATGGTGTCTTCCAAAATGAGATATAAAGGAGACCACAAAAGA<br>GAAACATGAGAAAGATAATTTGTCTATTGATTATTCTACTCACATCAGGGTTTATAAAA<br>GAATGAATTCTCTTTATTCAACTTCGTTTATAACAACACTAGTATTATATAGTTTTTGCTTTT                               |



|                        |                                                                                                                                                                                                                                                                                                                                                                                                                                                                                                                                                     |
|------------------------|-----------------------------------------------------------------------------------------------------------------------------------------------------------------------------------------------------------------------------------------------------------------------------------------------------------------------------------------------------------------------------------------------------------------------------------------------------------------------------------------------------------------------------------------------------|
|                        | GATCAGATAATTTGTTTCGTGA                                                                                                                                                                                                                                                                                                                                                                                                                                                                                                                              |
| promoter_TPM10000_09   | GTCGAGATGCAATGTTCTGAACACTTTTTACACGGTCCGACGATTCTTGTCAGAGCT<br>GGACAAGGTAGTTAGTAAGTTGGTTAAATTTAGTATAGTATTTAAATTATATATAGTCATA<br>ACTTTTAATCAATTTACTTTTAAATTTATAACTGTTTTTCCCATTGAACTATTCTCCTCGT<br>AATCTTCTCAAAAAACAATATTTTATTTAATATTAAGAGAAGCCCATCCGAACATCC<br>ACCGTCCACCCAGTTAGACGGCAGGAGACGGGAGAGTGACTGACTTCCGAAGCCC<br>CTGCCTTCCGCGGACTTATTTTTCTTCCCACGTAATTATAAATTTAATAATTATTTTATT<br>TTTTATATCAAAAATTGTTTTAAATTTCTTTTTTTCATTCCCTTATTTTCATATTTACTTCTA<br>ATCTTATTTTATAGTTTTATTAATCTTTTTTATAGGTAAGTACTTACTTACAAATCAACCAAC<br>CAACCACTAAAGTCACACAAAA |
| terminator_TPM10000_09 | AATTATTTACCTATTTTAAATTTTTATAATTTTTTATTATTACTTTCTTATTATATAAATTT<br>AGTTATAATTTATTTTTATTATTTTTTATGTTTCTTATAAGTGTGCGACTGATTACGAGGGG<br>AGTTTTTCTTATTGCTATGCGCTTTGTGGTTTGAGGTGAAACAGTCGCGACTTGGCA<br>GTTTTGGCTTCAACGAGCCTTAAGAATTTTTTGTGGTTTTCTCACGGTCCGTTTTGA<br>GCTATTATATGTTTAAACGGCTCATTAGATATTCCACATTGAACCACACCGTTCCACCATC<br>ACTTTTTGGTTTTTTTCATAAAATTTTGCATCACTTTCAAATGGAACGCTAAC                                                                                                                                                                |
| promoter_TPM10000_10   | AGAAAACGAAGACACCATTTTTGAGCCTGCCATATCCAAACTTCTTCTACCCACTTC<br>ATAATCGACTTAAATGAAATTCAGTCATAAAACCGCAGAAACACACAGACGCGCCCA<br>CCCGTAACACGTCATCTTATTCATGCCTGTATTGACCTCCTCAAGCAACTATTTTGA<br>CAATCCCCAAACAATCCAAACACCCAAAAAGTAAACCCACCATTACACTTCCCCAACA<br>TTCACACGGAAATTTCCACCCTTCCCTCCTTCCCTCCTTGCCTCCTCCTACCTTGCG<br>GGACACCCCGCCCCGCCCCGCTTGTATCCCTCATCCCTCAATTTAATTAATATT<br>GATAAATTTTTGTTCTCATTTTCTATTGTGTTTTCTTTGTTTTTTTTATAAATACTTTTC<br>CCGTTAAGATATTCTTCTATTATAAAGAAAAAGTTTTAGTTCGTTAATTTTTTTTCGA<br>CTAAGTATCAAATAACCATACAAACAAAAACAA         |
| terminator_TPM10000_10 | AATTAATTTATTTATTATATCTTTTTTTTATTAAGTATTTTATCTTGTTTCCAATATTTATAT<br>TTTAAATAAAGATTACTTTTTATTAATTTCAAGTCAAGTGAACGTGAAGTTATGATTGT<br>TATTTCCAAGCTCTCTTGCTTGCCTGAATGAATTAAGTAAAGGAATTTCCGCATA<br>CTAGAGGAAATTGTTTCTCGACAGCAGCGATGCGCATGATCCACAGACTGTTTTCTT<br>AATCTTTCAATTGTGCTAATCAGTAATTTATATATGTCACGGTGTAGCTGGGACAAAT<br>TTTATTATTTGTTTTTTGGGTTTCTACCTGGTAGAATCTATTTCTTTGGAG                                                                                                                                                                         |

**Supplementary Table 7.** List of DNA fragments used in constructs for the generative modeling experiment.

| construct           | sequence                                                                                                                                                                                                                                                                                                                                                                                                                                                                                                                                                                                                                                                                                                                                        |
|---------------------|-------------------------------------------------------------------------------------------------------------------------------------------------------------------------------------------------------------------------------------------------------------------------------------------------------------------------------------------------------------------------------------------------------------------------------------------------------------------------------------------------------------------------------------------------------------------------------------------------------------------------------------------------------------------------------------------------------------------------------------------------|
| promoter_TPM10_05   | TTTAGCACGCGGGGTGTAACCTCAACAGAAAAATGTGCCATAGAACAAGACTAGGCA<br>AAAGCCAAGGAGCGTTTGCCATGAACTTCCACAACCTGCAACGCAACCAGCGCTGA<br>CGACATCCAAAGATCAAGAAGCTCACCCATTCCAGGTTTCATAAGTTGGCAATATCG<br>ACATCTCAATCCCAGCGGATCTGTAAGCTGCTGCAAGCTACAATCAGA<br>ATTAATTTTCATAGAAAAATGATGGGGAATTTTCATTATAGGTTAATTGCAAACACAATTAA<br>ACTTTGCAGATATTATGTCTTATTTCTTCTTAAAATGGACTCTATGATTATCGTATTTTC<br>CCACTATCGTAACATAGGGCACCGAAAAAATAGCGATCTGTATAGATTACGTGAGTTC<br>AATATTAGCTAAGCTGTGCACATCACTTTGCCGCTTTTGTACCATCCGCTTCTCTAA<br>AATTGAATTA AAAAGGTGCTTTTAAAATTAATGCAGATTTTCGTCAAGACTTTGACCG<br>GTAAAACCATAACATTGGAAGTTGAATCTTCCGATACCATCGACAACGTTAAGTCGA<br>AAATT                                                                                                        |
| terminator_TPM10_05 | GATCCCAACGAAAAGAGAGACCACATGGTCCTTCTTGAGTTTGTAAACAGCTGCTGG<br>GATTACACATGGCATGGATGAACTATACAAATAGAATCATCTCTTCAAACACAAATAT<br>TTAACGGCACTACAAAAAAGGCGCAAAAACGAAAAGTACTACAGCAGCCTTCAA<br>ACACATTCAAAAATACGCTCATGTGGATCTCTTTTATCATATAATGGGCGACTATTT<br>GTCCTTCTATTATTTTTTTTCAGACTTCTGCATCCCTTTTGGCGTATGCCATATTGTT<br>CGTCTCCATAGACAAAAGAGGGGGAGATAGAACCATCACTATCCTGTTTCATTTTCCA<br>TTTATTTTTTTTCATTGATTGCGCGTTATAGTAAAGAACATCAACAGGGAGGACATGT<br>CCAATATTTTACTGGAACGGCTTTGGTAAAAACTGGGGTTAGAGCCTGAAATTTTCT<br>CTTACCTGAATCTAAATAGTAATGATATGGTTGTCTGTTGTGGGAAAAATGTCAAACC<br>ATAAGTTTAAAAAAGTAAAAAACGATCTTCTCAAGAAGGAATAATATAAAGCATGATAA<br>AGTGAGCCTTGGCACACGACTAGCGCTTTCAGATATTA AAAAGTTTAGATGTAGGTT<br>TTAGCGGTAACAGTTATATAAATCGTGTCTTCTCTTGATGAAA |
| promoter_TPM10_06   | TTTAGCACGCGGGGTGTAACCTCAACAGAAAAATGTGCCATAGAACAAGACTAGGCA<br>AAAGCCAAGGAGCGTTTGCCATGAACTTCCACAACCTTGGTATAAGCAATGAACAAT<br>CCCAAAACATACAGTAAAGCGATTCTATTATATACGGGAAAAGAATCACTGCGCATG<br>ATAAAAATTTTACTGCGATAGCAAGATTCATTAATATTTTTCAACTTCTTGATTGGCCC<br>TTCGTTGTAATACAGGTGCAATGTGCACATCATTGAGGCACAAATAGGTAAAAAGTC<br>CAAAGTGGATTCTTCTGCTGAGTGGTTGATTAATAAATACGAAGCTTTCTGAACTGAT<br>TCCTCAGGTTCCAATTTTCCATTGCTTTTTCTTTTTTCTAATATTTTGTATATATTT<br>GAGTTATGCGATCATTGTGCATCTCCTTCAATTTACTACACTATTTTTTATTA AAAACA<br>ATGACCACATTTCCACGGCACCTTACCAATACAATGCAGATTTTCGTCAAGACTTTG<br>ACCGGTAAAACCATAACATTGGAAGTTGAATCTTCCGATACCATCGACAACGTTAAG<br>TCGAAAATT                                                                                               |
| terminator_TPM10_06 | GATCCCAACGAAAAGAGAGACCACATGGTCCTTCTTGAGTTTGTAAACAGCTGCTGG<br>GATTACACATGGCATGGATGAACTATACAAATAGAAATATTGAATATCGGGAAAAAATT<br>TGCATAACTGAATAATTGCATATTTTCAGCAAATAAAGAGTAGGAGCGGTAGACTCGA<br>AAAAAATACAACATAAGTTTTTATGATATGTATCCCAACCACTTGCATTCAAGTCTTTTAT<br>ATGAATGTCAATATGTGTTGACTTAAAGAATCGGATAGTATCTTATTCTTGATCAAGGA<br>ATAATAATTTTTCTGTCTAAAAATTAAGTTTCAGAAAAGCGTCTTTTGGTCACACGACT<br>AGCGCTTTCAGATATTA AAAAGTTTAGATGTAGGTTTTAGCGGTAACAGTTATATAAAT<br>CGTGTCTTCTCTTGATGAAA                                                                                                                                                                                                                                                                   |

|                              |                                                                                                                                                                                                                                                                                                                                                                                                                                                                                                                                                                                                                                                               |
|------------------------------|---------------------------------------------------------------------------------------------------------------------------------------------------------------------------------------------------------------------------------------------------------------------------------------------------------------------------------------------------------------------------------------------------------------------------------------------------------------------------------------------------------------------------------------------------------------------------------------------------------------------------------------------------------------|
| <p>promoter_ TPM10_07</p>    | <p>TTTAGCACGCGGGGTGTAACCTCAACAGAAAAATGTGCCATAGAACAAGACTAGGCCA<br/>AAAGCCAAGGAGCGTTTGCCATGAACCTCCACAACCTTGTTGATAATTAATTCGTTGAT<br/>GCAAACCTCTAAAAATGAATTGAAAAATAAATTTAAGCAGTGCTCGCCTTGAGAC<br/>TTGGAAGAAAAAATTTAATAGAATGAAAAAATTTTCGTGTATGTCTCTATAGTCATT<br/>TGCGTCTCCTGCGTTTATGAACCTAGATTAATATGTAAGTTAAAGAGTATATCTAGAAA<br/>ATAATTGTATCAAAAAGAATCAATAGCTCTATATCACTGTTTCTAATTGTATGATTTTTATA<br/>TTGAGAAAAATCACCATTTTTATTTCTGATGATAACATTGCAATGTAGAAAAGCGTTGT<br/>TTTCAAAAAGCGCAATAAAAAATCAGAAAACCCACTATGCCATTCAAAAAATAGAAA<br/>GAATATAACGAATTCAAATAGTCCAATGCAGATTTTCGTCAAGACTTTGACCGGTAA<br/>AACCATAACATTGGAAGTTGAATCTCCGATACCATCGACAACGTTAAGTCGAAAATT</p>      |
| <p>terminator_ TPM10_07</p>  | <p>GATCCCAACGAAAAGAGAGACCACATGGTCCTTCTTGAGTTTGTAACAGCTGCTGG<br/>GATTACACATGGCATGGATGAACCTATACAAATAGAAAAGGACCGATGGCAAGTCGTAT<br/>TTTATAGCATTCTTTTCGTGATTTTTTGTTCATTCTAGTTATAATTGGGGCCGTGGGCCAT<br/>TTACGTGTGTGAACCTACGTGCCAAAATTTAACCCCGAACATTAATATATATAAAAAATA<br/>ATAAACATAATGGTCTTGGTAATTTTCCATATTTAAGTAATTTATTTTTACCTTTGTTTA<br/>ATACTGACTTTGAAACGAAAAATTAATTTAAGATAGATAAGAATTAACACACGACTA<br/>GCGCTTTCAGATATTA AAAAGTTTAGATGTAGGTTTAGCGGTAACAGTTATATAAATC<br/>GTGTTTCTTCTCTTGATGAAA</p>                                                                                                                                                                   |
| <p>promoter_ TPM10_10</p>    | <p>TTTAGCACGCGGGGTGTAACCTCAACAGAAAAATGTGCCATAGAACAAGACTAGGCCA<br/>AAAGCCAAGGAGCGTTTGCCATGAACCTCCACAACCTTATCTACAAATTCGCAATCC<br/>CTCCAACCAATAAATTTTTTCCAAAATTAACCTGATAACGGTAGTACTATAAATAAGTTA<br/>AATATCAATAAAAAATTTTGAATGTCCTAGAAGTTTTCTATTTTTGCTAATTATAAAAAATC<br/>CTGATATAGATTTTTGTGGAAAGGAATTCATGCGTGTGTTAGTTCTACATTCTGTAGTAT<br/>ATTCATGTATATATTTAATCGCACCCATGCGCTCTTCAATCACAATCCCCGATTGA<br/>TTTGATCTGTAATAAATATTTAAAAATCCTCCTACAAATAAGTGAAGTAATTAAGCAAC<br/>AAGGAAAACCTCATAAAAAATGAAGATCATATTATATTCACCTCTAATTAATCGTAAC<br/>AATCCTCACCATTTGTATATAATGCAGATTTTCGTCAAGACTTTGACCGGTAAAAAC<br/>ATAACATTGGAAGTTGAATCTCCGATACCATCGACAACGTTAAGTCGAAAATT</p>      |
| <p>terminator_ TPM10_10</p>  | <p>GATCCCAACGAAAAGAGAGACCACATGGTCCTTCTTGAGTTTGTAACAGCTGCTGG<br/>GATTACACATGGCATGGATGAACCTATACAAATAGAAAATTGTACAGTTGCACAATGTT<br/>TTCTTCTATGTCGGGTTGGCATCATCGCGAACTATTGGCAGCCCAGCAAACGCTATC<br/>TCGATATGCAAATTAAGAGTTTGATGATAGCTGGATCAGATATATACTATTGAAATTTT<br/>CTTTACTATCATGGTTCTGTTAAGTGAATTAATGATTCAACATAATGCAACGTTGA<br/>GTTTGAATGTCTTTAGTGAGAGCATAGCACTTAATGGAGACAAAATATACACACGA<br/>CTAGCGCTTTCAGATATTA AAAAGTTTAGATGTAGGTTTAGCGGTAACAGTTATATAA<br/>ATCGTGTCTTCTCTTGATGAAA</p>                                                                                                                                                                            |
| <p>promoter_ TPM100_01</p>   | <p>TTTAGCACGCGGGGTGTAACCTCAACAGAAAAATGTGCCATAGAACAAGACTAGGCCA<br/>AAAGCCAAGGAGCGTTTGCCATGAACCTCCACAACCTACTCAATTCGCACTTTAGCAG<br/>TGTAAGTAAGAGCGACATATACGTTGCTGTAATGTATGTATAGGACTTAAATGGACA<br/>CGACCAGGCTTTTGTGCAATGAATTAGTTAAGCACGACAGATCGTACATAAAGCACC<br/>CCTATTTAGCTTTTTACCACACGCGTGCAGTTTTATAAAGGTTCCTAAGCTCAGATA<br/>ACTCCTAAACCTATATCACATCCAGTCATTTCTAGCTTCTTCTGGCAAATCAAAGCC<br/>CCCCCCAACAAAAAGTTTTAAGCATTGGATTCCGGACCCCTTCCGAGCAATCGT<br/>GAAATCCGAGGCAAATAAGGTAACATTCCTGAAAGCAGGATGGTTAAAAATGGAATA<br/>TCGCAATCGAAGTAGAAATTGCAAGAAGTATCTATAAATGCAGATTTTCGTCAAGA<br/>CTTTGACCGGTAAACCATAACATTGGAAGTTGAATCTCCGATACCATCGACAACG<br/>TTAAGTCGAAAATT</p> |
| <p>terminator_ TPM100_01</p> | <p>GATCCCAACGAAAAGAGAGACCACATGGTCCTTCTTGAGTTTGTAACAGCTGCTGG<br/>GATTACACATGGCATGGATGAACCTATACAAATAGCTTAAATTTAATGTTATATATTTTT<br/>CTGCTGTCTTTACAATTGTCTTTTATCTTGTTAAGGCACCGAGGATATGATGGAGGAA<br/>GTATAAAAAAATAGAAAAGCAGTGGAGATAGGATAAAAAATGTCGAGATGGAGAAAA<br/>TTTCAAAGCAACAAAACCTTCGATGGGAATCGAATGAAGCGCCGACTTTCTGACAT<br/>CACGCCCTACATTTATCACCGTAGAATGAGGGAACCTGGGCCACAAAATTGCACAC<br/>ACGACTAGCGCTTTCAGATATTA AAAAGTTTAGATGTAGGTTTAGCGGTAACAGTTA<br/>TATAAATCGTGTCTTCTCTTGATGAAA</p>                                                                                                                                                                        |

|                              |                                                                                                                                                                                                                                                                                                                                                                                                                                                                                                                                                                                                                                                                                                                                                                       |
|------------------------------|-----------------------------------------------------------------------------------------------------------------------------------------------------------------------------------------------------------------------------------------------------------------------------------------------------------------------------------------------------------------------------------------------------------------------------------------------------------------------------------------------------------------------------------------------------------------------------------------------------------------------------------------------------------------------------------------------------------------------------------------------------------------------|
| <p>promoter_ TPM100_03</p>   | <p>TTTAGCACGCGGGGTGTAAC TCAACAGAAAAATGTGCCATAGAACAAGACTAGGCCA<br/>AAAGCCAAGGAGCGTTTGCCATGAAC TCCACAACAGACAAAATTGCAGTCAAATAA<br/>GTCCTTCTCAAGTACAACGCACTGAAATAATATCTTAGTAATTGAACTATGATGTAAC<br/>CACCTTGTTAGAGTCTTGATATTTATAGCGGGATGTATAAACAGCATAAAAAAATGAT<br/>TTTTTTTTGAAGGCTGTATTATCTTGAAATTTTTAATATTTAATGAGAGAAGGTCAAAA<br/>AAACAAAGTAGGACTTTGAGATAAGTTTTACATGTAAATATTTCCCTTATACAACAC<br/>GTCATTGATCGACACCCATCTTTTTGTTCTCAAGTACGTGGTTTTGCCAGCTACAACA<br/>CGGTCTCAGCTTTCTTTCCAGGCAAAACAAAAAAGAAAAATAACAAAATAAATAATT<br/>ATCATTGCTATTATACTTGTAAGAATCATACTCTCATAATTCACACTCGCTTGTTTC<br/>TGAAAGATACCACAAACTTAAGTCACTAAAAAAATGCAGATTTTCGTCAAGACTTTGA<br/>CCGGTAAAACCATAACATTGGAAGTTGAATCTTCCGATACCATCGACAACGTTAAGT<br/>CGAAAATT</p>                                      |
| <p>terminator_ TPM100_03</p> | <p>GATCCCAACGAAAAGAGAGACCACATGGTCCTTCTTGAGTTTGTAAACAGCTGCTGG<br/>GATTACACATGGCATGGATGAAC TATACAAATAGACAACGTCAGCTCCATCAGCCTC<br/>TTGAACCTCACAATCATTTTTTTCTTCCGTGCAGTTCCTCAGCGCCATTTGTAGAAT<br/>CTTTGTCTAAAAGATAAAAAAATCGCAGCTGCTATAATGCAATTGAACTCTAGAAA<br/>AACCTCGTATCTAAAATCATCTAGGAAATAATCATGATTGAATATATTTGCTTGAAA<br/>CAGCGGATACAGTAATTAAGGTAGCGTTGGTAGCGTAGTTTTTATTACTTTGGATT<br/>CGTGCCACACGACTAGCGCTTTCAGATATTA AAAAGTTTAGATGTAGTTTTAGCG<br/>GTAACAGTTATATAAATCGTGTTCCTTCTCTTGATGAAA</p>                                                                                                                                                                                                                                                                        |
| <p>promoter_ TPM100_04</p>   | <p>TTTAGCACGCGGGGTGTAAC TCAACAGAAAAATGTGCCATAGAACAAGACTAGGCCA<br/>AAAGCCAAGGAGCGTTTGCCATGAAC TCCACAATTCTGTCTTCTAGGGAGCATGG<br/>GTAGCCAGGCAAAATACCACACTCTAAAAAACC GCAGTGAGAAAGAGAAGGCAGG<br/>GTGGAAGCTCAAATGAGGCCAATAACAAAAAATTTGCTCCACGACATACCCTCGT<br/>CTTTCTCTAACTATTGAAGAAAAGGTGTAATTTACCGGTATTGCCTTACGATATAAGA<br/>ACCCGGCAAATCAACACTAATTGTAATTGGCTGTTTCCTTCAATAGTTGAGTTATCGT<br/>GCTGTCCTTACTAAGTAAAAA AACATTATTCGTTTTCTCTAAAGAGCAGATGTCA<br/>GCTTGTTGCAGTGATTCTCAATTGGCGATAGATTTCTTACTTGCTTTTATTA ACTAAGA<br/>ATTATCGATCCAACCTCTAAACAATAAGGAAAAAATGCAGATTTTCGTCAAGACTT<br/>TGACCGTAAAACCATAACATTGGAAGTTGAATCTTCCGATACCATCGACAACGTTA<br/>AGTCGAAAATT</p>                                                                                                         |
| <p>terminator_ TPM100_04</p> | <p>GATCCCAACGAAAAGAGAGACCACATGGTCCTTCTTGAGTTTGTAAACAGCTGCTGG<br/>GATTACACATGGCATGGATGAAC TATACAAATAGTATATGTGGTAAGTTGAGCCGAAT<br/>TCCTTCTATGTTTGTGCAGTTTTGACGCTTATGTAAGGAGTGTAACATTCTAGTTGT<br/>AGGTCTACGGGGCGCTAGTCTGTATCTCTGGCTTAGTATCGTTAATTTTCTATGAT<br/>CTTCGTTACTCCTTCAGTGGTTATACGT CATATGTATTCAAGAAGAGTGTTAGATAGC<br/>TATATGCGTCGAATTA ACTTATTATCTATATTTCTTTTTGTGCGATCTTCTTGATTTAGC<br/>ATATTTAAATTTGAAAGTGGTCTACAGTGAATAAAGAGAAGGCAAATATAAAAAGAG<br/>ATGCTTGGCTTTTTTTTTGTCGGCTTTTGTATCTACTAATTACGCATCTTAGTTCACAT<br/>TATCATTTGGTAGAACTATACGAGATGAATCCAACAGCTTCTTCGAGGTTCAGATAAT<br/>TAATAAGCTTTGATACCACATGAGAATCGTCCAATTTGTCTCATAATGGGAGCATTTCG<br/>ACAATGCCACACGACTAGCGCTTTCAGATATTA AAAAGTTTAGATGTAGTTTTAGC<br/>GGTAACAGTTATATAAATCGTGTTCCTTCTCTTGATGAAA</p> |
| <p>promoter_ TPM100_05</p>   | <p>TTTAGCACGCGGGGTGTAAC TCAACAGAAAAATGTGCCATAGAACAAGACTAGGCCA<br/>AAAGCCAAGGAGCGTTTGCCATGAAC TCCACAAA ACTAGCTAAGCAAGTAAAATCA<br/>ATCCATGAATTTAATATTAATTTTTCTTTCTAAGTAATGACTAAATTTCTTTCTTTGA<br/>TCTTTCCATTTAATGATTTTTCTTAGTTAGTTTTCTCGTTTTACTAACTTTTATTTCT<br/>CCATCTTTTACCCATATTTTTATAGGCGAAATCACAAGTGTGTTCCACTTTTTCTC<br/>GTGATGAAGTTTGTGTA ACTACTTTTCTGGCTGATGACCTCGACACAACCAATCATC<br/>CCCCAAAGAGCTCTTCCAAGAGTCCCGTAATTTACATGTTTTTTGTGTTAATTTTTTTA<br/>AGCAAGCAATTATATACCCTTCACCATATTGTCTTTTCTCTACAACAGTTTCAGATAT<br/>CAACAAAGTGAAGGTCAAAAAAATGCAGATTTTCGTCAAGACTTTGACCGGTA AAA<br/>ACCATAACATTGGAAGTTGAATCTTCCGATACCATCGACAACGTTAAGTCGAAAATT</p>                                                                                                                 |

|                              |                                                                                                                                                                                                                                                                                                                                                                                                                                                                                                                                                                                                                                                                                                                                                                                  |
|------------------------------|----------------------------------------------------------------------------------------------------------------------------------------------------------------------------------------------------------------------------------------------------------------------------------------------------------------------------------------------------------------------------------------------------------------------------------------------------------------------------------------------------------------------------------------------------------------------------------------------------------------------------------------------------------------------------------------------------------------------------------------------------------------------------------|
| <p>terminator_ TPM100_05</p> | <p>GATCCCAACGAAAAGAGAGACCACATGGTCCTTCTTGAGTTTGTAAACAGCTGCTGG<br/> GATTACACATGGCATGGATGAACTATACAAATAGATTTTACACTACGAGAAAGACTGA<br/> AAAAAAGAAATAATTAATTCTGCTTTTAATTTTACATTTGTTAAATTTATTTTTTCGTT<br/> TATTTATATGTTAAGGTTAGTATATTTTGAACAATATTTGAAACATAAGTAATCCTACTC<br/> ATACGCCCTCTTTACATATATGAACTGTAGAAGGAGACGTGCATATTTGTACATAGT<br/> CATGGGACTAAATGGTAGCCAAATAACGAACGAGTAGGAATTGCACCCATTTCCAGG<br/> TTGAATGGGGGTGGTATTTGAGTCAGCCGTCCATATTTCTGCTTCTGCTTACTTGT<br/> AAAGTAATTGAAACAAC TAGAAAGAAATAGAGCAAAGTTACAATATTTTGTGATCA<br/> ATTTCCCATGATGGAAACATGTTAGTGAGCTATTGACATTTTATACTAACTGTAA<br/> ACTACTAATTATCTATATCCAATCATATAGATATCAATATACAAAGTTTGATAAGATTAA<br/> AAGTCACACGACTAGCGCTTTCAGATATTA AAAAGTTTAGATGTAGGTTTTAGCGGTA<br/> ACAGTTATATAAATCGTGTTTCTTCTCTTGATGAAA</p>         |
| <p>promoter_ TPM100_06</p>   | <p>TTTAGCACGCGGGGTGTAAC TCAACAGAAAAATGTGCCATAGAACAAGACTAGGCA<br/> AAAGCCAAGGAGCGTTTGCCATGAACTTCCACAAATCCAAAAGAAGAAAAGAAAATC<br/> GAGTGAGAGCGCCTTCTATAGAGTGTAACTGCACAGACTCCGCGGAACTAAAAGAG<br/> GCATTGGAAAAATGGTAAAAAGAGAAATATTGCAACAGCGTCCATTAGACCCTCTGG<br/> ACGAATTTTGACTCAAGAGAGCATAAAAAATTACATCGAATACGTAAAGAAAAGTTCTGT<br/> TGGTTTTTTTATAATCCTGTACTTTTTTTCATGAAACTCTCGCAGCATTGCAAAAAGTAAT<br/> CTTGGGATTTCTTTGCTTCGATCTCAATGGAATTAGTTATGGTCTTGCTATAGCCGC<br/> GGGACAAAAAAAAGTAAATATCGATGAAAGGGTTGTTAAAGTTAAAGGAGATTAA<br/> GTAATATTTGTGATGAAAGTTACTTATCGAGCAAATGCAGATTTTCGTC AAGACTTTG<br/> ACCGGTA AAACCATAACATTGGAAGTTGAATCTTCCGATACCATCGACAACGTTAAG<br/> TCGAAAATT</p>                                                                                                    |
| <p>terminator_ TPM100_06</p> | <p>GATCCCAACGAAAAGAGAGACCACATGGTCCTTCTTGAGTTTGTAAACAGCTGCTGG<br/> GATTACACATGGCATGGATGAACTATACAAATAGCGGCATTGAAGAAGTACATCTGAC<br/> GAAAATAAAAAAAATTGTGTATATATTTAGGTGCCGTTAACAGCAGCAGCAGCTGA<br/> TGGCAAGTTTAACTGGGGAAAAGATGTTAGGAACATTTTGTCTGGTAGACAATGAAA<br/> AAAATAATACACATATTTATAGTCACACCCTACAATAATTGGTCATAATCATATATTTTA<br/> TTCATAATATAACGCCAGATCATAATTGTTTTTGTGAGAATAATTTGAAAGGGGTACAT<br/> CCATCTAGAACACACGACTAGCGCTTTCAGATATTA AAAAGTTTAGATGTAGGTTTTA<br/> GCGGTAACAGTTATATAAATCGTGTTTCTTCTCTTGATGAAA</p>                                                                                                                                                                                                                                                                |
| <p>promoter_ TPM100_09</p>   | <p>TTTAGCACGCGGGGTGTAAC TCAACAGAAAAATGTGCCATAGAACAAGACTAGGCA<br/> AAAGCCAAGGAGCGTTTGCCATGAACTTCCACAACAGCTACTGTATATACTGAAAAC<br/> ATTTGTTTTAATTACCAAAAAGGTCTTATTTTGAACAGATAATGAGCTTTCCATTTGCA<br/> AATGCTCAATATTTGTGATCCTGTTGATATCTTCCATCTTGAACCTTGTATAGTGATA<br/> GTATAGATCTTGCTCACATTCAATTTGAAAAATACATACACATTTTCTCTAATTC AATAC<br/> AAGTTGCTGGAATCTTCGCAAATGTATGAACAATCAAGGTGACACAGTATTTCTCTGA<br/> TATAACAAAATAGTTTTCTAAGATTATTTTTATCCCATTCGGCAACCTTAAGAGGTGT<br/> TCCAACGAATGCAGGTGACGGTTGTCTGACCACAAGGGAGAGATAAAGACAATAA<br/> AAAGGATCACCCAATAAGAACTTTAGATCATAAAAATTTTTTAAATCTAAAAAAAACA<br/> CATACTTAAAATTCGTTTAATAAAGATATCATAGCATTAAAAAATTCCTTCTAATCAACC<br/> TGTGAAAATGCAGATTTTCTGCAAGACTTTGACCGGTA AAACCATAACATTGGAAG<br/> TTGAATCTTCCGATACCATCGACAACGTTAAGTCGAAAATT</p> |
| <p>terminator_ TPM100_09</p> | <p>GATCCCAACGAAAAGAGAGACCACATGGTCCTTCTTGAGTTTGTAAACAGCTGCTGG<br/> GATTACACATGGCATGGATGAACTATACAAATAGATTTTACATTTTTTGTATGTCCTT<br/> CATATATATATGGACATTTGTTAATTTTTTTACTTTTTCTTATATAGATTTTATTGTATGCG<br/> TGGATTACCGGGATGGAGTTGTCAGTGGTAATATCCATAGTAGTGGAGGTA AAGGAA<br/> AGGATGTAACATATTA AAACATTTGCGCAATTAAGAACATCTTTCTATTGGGCACACTT<br/> GTATACTATATTTATATACAAAAAAAACATTGACTTGATATCAGGTTATTACTAATTT<br/> GATATTATCGAATTTTTACTACTAAAATAATCCACTAAGGTGAATTTTAATAAAGGTGG<br/> GGTCTATCTATGAACACATGAAAACAAGATAGCTCAACATAGTATCGAAAATAACTTA<br/> GGCTGGCATTAAAGTGTATAATAAAGAAAGCAGACCTTTGAAACCGGGGAACGAC<br/> GAATGTGAAGAAGAAAACATAAAGCACATCATTATCCTCTCAAGCGTTTATTGAAAG<br/> GGAGCCACACGACTAGCGCTTTCAGATATTA AAAAGTTTAGATGTAGGTTTTAGCGG<br/> TAACAGTTATATAAATCGTGTTTCTTCTCTTGATGAAA</p>  |

|                               |                                                                                                                                                                                                                                                                                                                                                                                                                                                                                                                                                                                                                                                                              |
|-------------------------------|------------------------------------------------------------------------------------------------------------------------------------------------------------------------------------------------------------------------------------------------------------------------------------------------------------------------------------------------------------------------------------------------------------------------------------------------------------------------------------------------------------------------------------------------------------------------------------------------------------------------------------------------------------------------------|
| <p>promoter_ TPM1000_02</p>   | <p>TTTAGCACGCGGGGTGTAACCTAACAGAAAAATGTGCCATAGAACAAGACTAGGCA<br/>AAAGCCAAGGAGCGTTTGCCATGAACCTCCACAATTGCAGCCGGTGTAGAGTTATT<br/>TTCCATACTAGATCCGTCACCCTGTTTTACGCGCAAGAAGCAAACCAAGTTAAATA<br/>CTTCACAAGTAACCGCCACATAAAGTACAGAGCTAAACGAACCCTCACTATTGGATT<br/>CGTCGGCCCTGCCCTATCGATGAGCCATCAGCCGACGGCTTTTCAGGACTGATCGT<br/>ACATTAACGGCAACCACGTCTCCAAAACCTGTGTTTCTTTCTATTGACGATGTTGTG<br/>GTGTATCGGCAAGGTTCTTTTCCACCATGGCCAAAGATCGCATCAGGAAAGAGC<br/>GCACTGGCCGAGAGGCAAGACCCCGTTCTTACCAAACCTCCTCATATAGATATGTAG<br/>CGGATTTAGGTATTAACAAGTTATATCTTTCTTTCTTACCAAACAAATGCAGATTTTC<br/>GTCAAGACTTTGACCGGTAAAACCATTAACATTGGAAGTTGAATCTTCCGATACCATC<br/>GACAACGTTAAGTCGAAAATT</p>          |
| <p>terminator_ TPM1000_02</p> | <p>GATCCCAACGAAAAGAGAGACCACATGGTCCTTCTTGAGTTTGTAAACAGCTGCTGG<br/>GATTACACATGGCATGGATGAACATAACAATAGTTTATTTTTATCCAGTTTAAATTTG<br/>TGTTGTTATAAAAATATATATGTTTATTAATATTTAGTATATTTATGTATTTTTATTTTCATT<br/>ATTGCCTTTTCTTTTTTTTTCGTTATGTCCTCGGGTTGTTTTTGTCTCTGTAGTCCC<br/>GCGGTGTGGTGGTTGTGACACTATTAACGCACTGGCAGAAAAAATTCAAAGACTAG<br/>CCTGGTATTTTTTGAATATTCATTTAAATCGTTCACATCTACAAACTTTCCGACTCTA<br/>GTTTTATCTGACAACATCGTACTTAGCAAAGTTTTGGTGACCAGCAAATGTAGCAGA<br/>ACAATAATTGAGCCACACGACTAGCGCTTTCAGATATTA AAAAGTTTAGATGTAGGTT<br/>TTAGCGGTAACAGTTATATAAATCGTGTCTTCTCTTGATGAAA</p>                                                                                                  |
| <p>promoter_ TPM1000_03</p>   | <p>TTTAGCACGCGGGGTGTAACCTAACAGAAAAATGTGCCATAGAACAAGACTAGGCA<br/>AAAGCCAAGGAGCGTTTGCCATGAACCTCCACAACCTTTTTGAGACGCCTATTCA<br/>CCCCTGCAATCGCACACTAAGCTGTCCAGCCTTTAACTCCGTAAGTCTCTTCTAT<br/>TTCCCACCATCCTATTATCCCGTACGCCCGGTGCGGAATCCAATGATATCTTCGTAG<br/>GCGCACGCGCAAATCAGTACTTCATTTTTCTTTTCAGTGATAGCATCCATTTTCTCT<br/>TAATGCCTTCCAATCCCCCATCGATGATCGCAAATGAGCTCCTTCAACCTGGCAAT<br/>GCTTGGGCGAAATCCGCAAACCCTCCTTTCTACCCTATTGCGAAGTCTTCCGCCTT<br/>GTGAGCAATCACTAGATACGATTTTACGATTTATTGCTTTTGTATGAAACTCTTTTTA<br/>GTTCTTTTCTGTTAGATTTTTATTCTTAGTAGAAACAAACAACCAATGCAGATTTTC<br/>GTCAAGACTTTGACCGGTAAAACCATTAACATTGGAAGTTGAATCTTCCGATACCATC<br/>GACAACGTTAAGTCGAAAATT</p>          |
| <p>terminator_ TPM1000_03</p> | <p>GATCCCAACGAAAAGAGAGACCACATGGTCCTTCTTGAGTTTGTAAACAGCTGCTGG<br/>GATTACACATGGCATGGATGAACATAACAATAGTTTATTTATATAGAAAAACTATTG<br/>AAAACATAAAAGAGCAGAAAAGTCGTAGAATTAAGATGATTAATAATTTCTTGTTGTT<br/>TTTGACTTTTTTACTTTTGCCAATTTTTGGGTAGGGACAAAATTTGTTGCAGGGAG<br/>AACAGCATTCTGGTGAATTGTGTCCACCTAAGTCTTCGACGATGAGCGAAGAGGAG<br/>AATGGCCACCCATGTAGAAACTATTTACGCATAATAATTCAAACATAGATAACAACCTA<br/>TTTATGTCCGTGAGCGTGGACTGCAGAAATTTTATAAGCAATCACACGACTAGCGCT<br/>TTCAGATATTA AAAAGTTTAGATGTAGGTTTTAGCGGTAACAGTTATATAAATCGTGT<br/>TCTTCTCTTGATGAAA</p>                                                                                                                                   |
| <p>promoter_ TPM1000_04</p>   | <p>TTTAGCACGCGGGGTGTAACCTAACAGAAAAATGTGCCATAGAACAAGACTAGGCA<br/>AAAGCCAAGGAGCGTTTGCCATGAACCTCCACAACAACGCGGAGGCTATTGCCTCT<br/>GCCGCTCAACCCTTCTGGCTTCTTTTTCCATTTACAGGCGCTGTCTGAATAGGTA<br/>GGTGTGAATGTTTACCCAAAATGTGCAATGCGCGTTGGCAGATTGTCTGGTTACC<br/>TTTTCACTGGTTGTTTTCTCTTGCATCCAAATTCACATACTACTCGTTCATAGTCATT<br/>CAGCACTACCAACCAATTTTTTCTTTCCATTCTCCGTTCCGTCCTCTTAAAGCG<br/>TGTGCTGCTTCCGACGGCCCTCCGGCTGGGACGAGTGGGGATGATGGCCCGCCC<br/>TCTCATTGCATAAAGTCGGAATATAAATTTCTTTGACAGTTTTCTTATCTTTTTTG<br/>ATGCGTGCGTTATTCTTCTTTTTTACACGAAACATTTGTATAGATCACAACAACAC<br/>AAAAATGCAGATTTTCTGCAAGACTTTGACCGGTAAAACCATTAACATTGGAAGTTGA<br/>ATCTTCCGATACCATCGACAACGTTAAGTCGAAAATT</p> |

|                        |                                                                                                                                                                                                                                                                                                                                                                                                                                                                                                                                                                                                                                                                                                                                                                                  |
|------------------------|----------------------------------------------------------------------------------------------------------------------------------------------------------------------------------------------------------------------------------------------------------------------------------------------------------------------------------------------------------------------------------------------------------------------------------------------------------------------------------------------------------------------------------------------------------------------------------------------------------------------------------------------------------------------------------------------------------------------------------------------------------------------------------|
| terminator_ TPM1000_04 | <p>GATCCCAACGAAAAGAGAGACCACATGGTCCTTCTTGAGTTTGTAACAGCTGCTGG<br/> GATTACACATGGCATGGATGAACTATACAAATAGATATCTGGAATCCACTCCGCATCA<br/> TATTTATAAACTTAAAGTTATTTTCGAGACAGTTTCTAATTGATTACTAGTTACTTATAGG<br/> TAAAGGGTTACCTTCTCATATATTTCTTTTTAATTATGCTTATAGTCTTATACTATTAT<br/> TTTCTTTTCGATTATAAGGTGTTAATATATGTAAGCAAATATATTACGGTATAAAATAA<br/> TAGTCTTTTATAGTACATGTTTTTTTTCGCAATGTTTTTATTCTTCTTTGCTTTTTTCTT<br/> TCCGCCTGAGTGCTTAGGTGTTAGTTC AACCGGATTTTGCATTACAGTTTTTAAAGAAT<br/> CTATTGCCAATAGGGGGCATATGGCTAGATATGAATGTCGCAACATGTCATACTATTA<br/> GAACTTTTACTTTTCGAGCTGTTTGCTCTTTCTTCTTATATGTAATCCAATCCAATGGT<br/> ATCACATTATTAGGCAGCATGCAAAATGAAAAAAAAACACACGACTAGCGCTTTTCAG<br/> ATATTA AAAAGTTAGATGTAGGTTTAGCGGTAACAGTTATATAAATCGTGTTTCTTCT<br/> CTTGATGAAA</p>                       |
| promoter_ TPM1000_05   | <p>TTTAGCACGCGGGGTGTAACCAACAGAAAAATGTGCCATAGAACAAGACTAGGCA<br/> AAAGCCAAGGAGCGTTTGCCATGAACTTCCACAACCAAGTTGCGCCTGCCCTCG<br/> CTCATCCCAATTCGAGAACTTATCAAATTGAGCACATTTCACTATGGATACTGTCAG<br/> AGTCAACAATACACCCCTTTCAAACCGAACTGAAGACTTCAAATCAAATCAACTGGAGAA<br/> AACATACTGTCAGTACAGGCACAGCGATACTATCCAACATCCTATTATACGACATCT<br/> TATTTTTCATATTTCCATCCCTTCTTATCATTACTCCCTTCCCTTCCGTCCTCCTTTTTTC<br/> CCTGCTGATTCTCCCGGGGGCCACCCCGGGCGGGCATGTTGGAGAGAGGGCGG<br/> TCCCTGAGAGAATGAAAGGTAAAGATACCTGCCTAATCATGATTTTCCATTTTTCGTG<br/> CTTCTTCCACCTAACAACATATTGTATGAGCTGTAATTTTTCCATAACTTGAGTTAA<br/> ATTTTATAAATTTTTTCATATTTTTTCCCCATCTCAAGTAAATAATCTCATTTAAAAATA<br/> ACAACAAAAAAGAATGCAGATTTTCGTCAAGACTTTGACCGGTAAACCATAACAT<br/> TGGAAGTTGAATCTTCCGATACCATCGACAACGTTAAGTCGAAAAAT</p>      |
| terminator_ TPM1000_05 | <p>GATCCCAACGAAAAGAGAGACCACATGGTCCTTCTTGAGTTTGTAACAGCTGCTGG<br/> GATTACACATGGCATGGATGAACTATACAAATAGACCTAAATTTTCGTAGTTTTTTCTA<br/> TTAAGTATGATATTTATTCACGGAATATATTCTTATAAGTCGATTAGGTGCAGGAAAAAT<br/> GGCATTTTTGGAGAATATCATAAAACATAAAAAATTGTACAGAGACGGAATAGTGAAT<br/> TGTGGGAAAGCAGGGACAACAACGGTTTTTCTTGCTCGCAATGAGAATCTACTCCTG<br/> GCAACTTTCCACAACGAACTTTTCAAGCCCGCTATCACTTTGACCACCCCTGCGTA<br/> AGACCTGCTGCCACACGACTAGCGCTTTT CAGATATTA AAAAGTTAGATGTAGGTTT<br/> TAGCGGTAACAGTTATATAAATCGTGTTTCTTCTTCTTGATGAAA</p>                                                                                                                                                                                                                                                              |
| promoter_ TPM1000_07   | <p>TTTAGCACGCGGGGTGTAACCAACAGAAAAATGTGCCATAGAACAAGACTAGGCA<br/> AAAGCCAAGGAGCGTTTGCCATGAACTTCCACAATGAATGCCATTGTGCCAACCACTT<br/> TGCATTACTTACTATATACAGCAGTAAGCCTGATTTT CAGGAGGTACAATCCACAAGA<br/> TATCCTAACTATCGAACAGATATTA AACTGTCTTACATCATTAAATCACCTTAAAAAGA<br/> GTGTTCCCTCTCCATATTTAATTGTTCCCCCTGCTCCGTCTCATAAAACCATCACT<br/> TCAACA ACTACAACAGCAATTAAGCAGACTTTTTCGTACCTTCTACCCGGGAAACT<br/> TTGGGCAGATTTTATGCGGCCAGCCGTTTCTCACATTGTTGTTGTTGCGGGGACTC<br/> ACCAGCGGTTGAAAACCTGAGTTTTGAATAAAAACTATTGAAAAGTAGCTATATAAGA<br/> AATGAATAAAGCTTTTCTTAAAGTAAATTTAAATTTGTTTTATTCCCTTTTAAAAAGTATTT<br/> ATATTTTCTAGTTATCTTCTTTTATTTTTATTTTTATTTTTCTAACGACCATAAAAAAC<br/> GAACAACAAATGCAGATTTTTCGTCAAGACTTTGACCGGTAAACCATAACATTGGAA<br/> GTTGAATCTTCCGATACCATCGACAACGTTAAGTCGAAAAAT</p> |
| terminator_ TPM1000_07 | <p>GATCCCAACGAAAAGAGAGACCACATGGTCCTTCTTGAGTTTGTAACAGCTGCTGG<br/> GATTACACATGGCATGGATGAACTATACAAATAGATAATCCTATTATGACCTATTTATTT<br/> CTTTGTTTTTCTTTTTTTTGTCTTTTGTACTATAAGTATAGTAATGCATTCTTGTTTTT<br/> TTAAATGCAGTTCAAATATAAAAATTTATGTGACAGAATGGCAACATACTCATGTTATTC<br/> ATTCAATGTACACACACACTTAAATCCACGAATCGCGAAAGTTATTGAATTCGCCCGA<br/> TCGCCTTCTATCATCTGTGAAATTTTTTTTGTCAATTTCCCAAGCCACTTTTTTCTCA<br/> CACGACTAGCGCTTT CAGATATTA AAAAGTTTAGATGTAGGTTTTAGCGGTAACAGTT<br/> ATATAAATCGTGTTTCTTCTTCTTGATGAAA</p>                                                                                                                                                                                                                                                                      |

|                        |                                                                                                                                                                                                                                                                                                                                                                                                                                                                                                                                                                                                                                                                                                                                                                                   |
|------------------------|-----------------------------------------------------------------------------------------------------------------------------------------------------------------------------------------------------------------------------------------------------------------------------------------------------------------------------------------------------------------------------------------------------------------------------------------------------------------------------------------------------------------------------------------------------------------------------------------------------------------------------------------------------------------------------------------------------------------------------------------------------------------------------------|
| promoter_ TPM1000_09   | <p>TTTAGCACGCGGGGTGTAACCTAACAGAAAAATGTGCCATAGAACAAGACTAGGCCA<br/> AAAGCCAAGGAGCGTTTGCCATGAACTTCCACAAGGTCTACTGTAATTCATTTAATA<br/> CCTTTGCTCGTTACCCTTTATCGATCCGCATGTACCGGCGATTCTCTCTCAATCAGT<br/> GCTAGCACGGCACTGTAAACATGATTGGTTCATCCCGATCCGCATTGTGCGTAGCA<br/> GCTGCCTCGGTGTGATTCCTTAACTCAATCTACTCCCACACATCTCTTCAATTTGACT<br/> TCAAGAGACCGATGAGCAGTAAAAAGGTATCGGAGAGAGGCTACCCGAAGGTGGG<br/> AATATTGGGGGAGAAAAGGTGACAGGCGTTTGTCTCTCCTCCGGCTATTCTAAACT<br/> CCCACGGTTGGGTAGGTGAAGGAAGGAAAAGCTAAAGAAAAAAAAGGAATTTTTGTC<br/> TAATGTAAGATTTTCTTTTCTTCTTTGATTTTTTACACCCAAAAAAAATTTCTTATTA<br/> AAAAGATTTGAGTTTTCTTTTATATTTTATATTTTACAGAAATTAATTCAAGTCATATACAGCAA<br/> AAAACCAAATACAAAAATGCAGATTTTCGTCAAGACTTTGACCGGTAACCATAACA<br/> TTGGAAGTTGAATCTTCCGATACCATCGACAACGTTAAGTCGAAAAAT</p> |
| terminator_ TPM1000_09 | <p>GATCCCAACGAAAAGAGAGACCACATGGTCCTTCTTGAGTTTGTAAACAGCTGCTGG<br/> GATTACACATGGCATGGATGAACTATACAAATAGATAATCTATGTAAGATTTATATCT<br/> AAATATAATATCTTAAACACGTATACACAAGTTACCGATCACGTGGGGATTCTTGGGA<br/> ATTGAAAAAAGTGTTTGGCGTTATGCAAGCCGCTTAGGTAAAAGGTCACCCATTATAT<br/> ATGTATTAACATAAATTCATGGAATTAATCATGAAACCCAAAAACAATCAACTAAGAAAA<br/> AAACAAAACAGAAAAACCGGAGTTTTGGATGCCAATTTTTCTATTTTGATCCACACG<br/> ACTAGCGCTTTCAGATATTAAGTTAGATGTAGGTTTTAGCGGTAACAGTTATATA<br/> AATCGTGTTTCTTCTTGTATGAAA</p>                                                                                                                                                                                                                                                                                      |
| promoter_ TPM1000_10   | <p>TTTAGCACGCGGGGTGTAACCTAACAGAAAAATGTGCCATAGAACAAGACTAGGCCA<br/> AAAGCCAAGGAGCGTTTGCCATGAACTTCCACAATGGAACGAGAAAGCATGTGGTC<br/> TTGAACGGTTCCTGATCCTATAATCTAAGAACATTAATTTACTCATTACCTACTTCCA<br/> CCAGTAATACCACAGGTACATATACCCTATCAACGACCTACATCATCGTAGGGTCAAT<br/> GGGAGTCTGCAACGCGGTCTACCCTCCAGGACAGAACCCACCTGATCGAGGGG<br/> ATAGTCGCTCACGCTTACCACAGCGGCTATGTACATTTGTCCAGTAAGTTCTTGT<br/> ACCTTCATCCGACACCACTCACCCCTGTTGCTTTCTCCTTGCTGCGTCACAATTTT<br/> CCCCGCGGCGACTCAATGAGTGAATTAATTGAAAATAAACTCATGATTTTTCTAGGT<br/> TTTCTTTATTCTCTTTTGTATTGTTAAATTTTTCTTTTTTTCTTCTCTAATCATT<br/> TATATTGAAAAGTATTTCAATCAAGTGAGATTAACCTAACACAAAAACAAAATATTATA<br/> TATTACACTAAAAATGCAGATTTTCGTCAAGACTTTGACCGGTAACCATAACATT<br/> GGAAGTTGAATCTTCCGATACCATCGACAACGTTAAGTCGAAAAAT</p>                |
| terminator_ TPM1000_10 | <p>GATCCCAACGAAAAGAGAGACCACATGGTCCTTCTTGAGTTTGTAAACAGCTGCTGG<br/> GATTACACATGGCATGGATGAACTATACAAATAGAGGATTATATACTTTGTATTATAG<br/> TTAAAATAAGTAAGTCATTGAACACCTTAGTTTATTACTATTGCTGGTCTCTACTGA<br/> TTGTCATAGTGACTTTTATGTAATGAAAAGCATTGTTGCCATTCAACAGTATAAACGCTAA<br/> TCTCTAGAAAAACAGACACTTTTCATCGAGTAAAGGTAGAGGCATTATAAATACACAA<br/> CCATTAAGCCGATTATGAAACATGATAAAGGCACTACCTGATCCCTAACTACCAACT<br/> CCCTCTATTTTTTACACCAAACACACGACTAGCGCTTTCAGATATTAAGTTTA<br/> GATGTAGGTTTTAGCGGTAACAGTTATATAAATCGTGTTTCTTCTTGTATGAAA</p>                                                                                                                                                                                                                                                          |

Promoter\_RPL3 and terminator\_RPL3 have 40 bp homologous sequences flanking both ends for ligation with GFP and integration into XI-2 genomic site. Other promoters and terminators have 90 bp homologous sequences flanking both ends.



**Supplementary Table 8.** List of PCR primers.

| primer name            | sequence                                                                   |
|------------------------|----------------------------------------------------------------------------|
| L90                    | TTTAGCACGCGGGGTGTAA                                                        |
| R90                    | TTTCATCAAGAGAAGAAACACG                                                     |
| promoter_YOR063W_fwd   | TAGGCAAAGCCAAGGAGCGTTTGCCATGAACTCCACAATTATTTAA<br>TTCAGTGGTAATGCAA         |
| promoter_YOR063W_rev   | TTATGGTTTTACCGGTCAAAGTCTTGACGAAAATCTGCATTGATTGATT<br>GTTGTAGTAACTGTG       |
| terminator_YOR063W_fwd | TGCTGGGATTACACATGGCATGGATGAACTATACAAATAGAGAAGTTT<br>TGTTAGAAAATAAATCATTTTT |
| terminator_YOR063W_rev | ACATCTAAACTTTTTAATATCTGAAAGCGCTAGTCGTGTGGGCTTGCC<br>CTTCGAGTG              |
| pUC19_fwd              | TGTTTCTTCTCTTGATGAAAGGGTACCGAGCTCGAATTC                                    |
| pUC19_rev              | GTTACACCCCGCGTGCTAAAGGGGATCCTCTAGAGTCG                                     |
| 909                    | GTTTGTAGTTGGCGGTGGAG                                                       |
| 910                    | GAGACAAGATGGGGCAAGAC                                                       |
| GFP_rev                | AATTTTCGACTTAACGTTGTGCG                                                    |
| GFP_fwd                | GATCCCAACGAAAAGAGAG                                                        |
| GFP_qPCR_fwd           | GTCACTACTCTCACTTATGGTGTTT                                                  |
| GFP_qPCR_rev           | GTGTCTTGTAGTTCCTGTCATC                                                     |
| TAF10_qPCR_fwd         | ATATTCCAGGATCAGGTCTTCCGTAGC                                                |
| TAF10_qPCR_rev         | GTAGTCTTCTCATTCTGTTGATGTTGTTGTTG                                           |

**Supplementary Table 9.** List of DNA fragments used in constructs for the mutagenesis experiment.

| construct         | sequence                                                                                                                                                                                                                                                                                                                                                                                                                                                                                                                                                                                                                                                                                                                                                                                                                                                                                                                                                                                                                                                                                                                              |
|-------------------|---------------------------------------------------------------------------------------------------------------------------------------------------------------------------------------------------------------------------------------------------------------------------------------------------------------------------------------------------------------------------------------------------------------------------------------------------------------------------------------------------------------------------------------------------------------------------------------------------------------------------------------------------------------------------------------------------------------------------------------------------------------------------------------------------------------------------------------------------------------------------------------------------------------------------------------------------------------------------------------------------------------------------------------------------------------------------------------------------------------------------------------|
| <i>UBIMΔkGFP*</i> | ATGCAGATTTTCGTCAAGACTTTGACCGGTA AAAACCATAACATTGGAAGTTGAATCTTCC<br>GATACCATCGACAACGTTAAGTCGAAAATTC AAGACAAGGAAGGTATCCCTCCAGATCAA<br>CAAAGATTGATCTTTGCCGGTAAGCAGCTAGAAGACGGTAGAACGCTGTCTGATTACAA<br>CATTAGAAGGAGTCCACCTTACATCTTGTGCTAAGGCTAAGAGGTGGTATGCACGGAT<br>CCGGAGCTTTGGCTGTTGCCCGTCTCACTGGTGAAAAGAAAAACCACCCTGGCGCCCAA<br>TACGAGTAAAGGAGAAGA AACTTTTCACTGGAGTTGTCCCAATTCTTGTGAATTAGATGG<br>TGATGTTAATGGGCACAAATTTCTGT CAGTGGAGAGGGTGAAGGTGATGCAACATACG<br>GAAA AACTTACCCTTAAATTTATTTGCACTACTGGAAA AACTACCTGTTCCATGGCCAACT<br>TGTC ACTACTCTCACTTATGGTGTTC AATGCTTTTTCAAGATACCCAGATCACATGAAACAG<br>CATGACTTTTTCAAGAGTGCCATGCCCGAAGGTTATGTACAGGAAAAGAACTATATTTTTCA<br>AAGATGACGGGA AACTACAAGACACGTGCTGAAGTCAAGTTTGAAGGTGATACCCTTGT<br>AATAGAATCGAGTTAAAAGGTATTGATTTTAAAGAAGATGGAACATTCTTGGACACAAAT<br>TGGAATACA AACTATAACTCACACAATGTATACATCATGGCAGACAAAACAAAAGAAATGGAAT<br>CAAAGCTAACTTCAA AATTAGACACAACATTGAAGATGGAAGCGTTCAACTAGCAGACCA<br>TTATCAACAAAATACTCCAATTGGCGATGGCCCTGTCTTTTACCAGACAACCATTACCTG<br>TCCACACAATCTGCCCTTT CGAAAGATCCCAACGAAAAGAGAGACCACATGGTCTTCT<br>TGAGTTTGT AACAGCTGCTGGGATTACACATGGCATGGATGAACTATACAAATAG |
| promoter_POP6     | TTTAGCACGCGGGGTGTA AACTCAACAGAAAAATGTGCCATAGAACAAGACTAGGCCAAAA<br>GCCAAGGAGCGTTTGCCATGA AACTCCACAATCTCTTGATTATGTCATATGAAAGGTCCA<br>GTGGGACTTGCTTTT GTTG CAGCACCTTTGCTAATGAATGAAAGGCACATAGTGACTGCT<br>TAAAAATGCAGGA AACTTAAATTATTCCGAATGGTATTTTGTCTCACATATATTGCCCATAC<br>TGTGCCAGGATCCCGGCTT TACCCAGTATCATCATTGTACCGTTACCAATTCTCCTCGTAT<br>ATCACGGTTAGTTTTTAAACCTCGGGGTGACGTTACTATTGGCGTACTAATATATTCTTAT<br>TTTCTTTTCTTTTTT GTTGGCAGTTTCAAGCAACACATG TACTGGATAACCACCCCGC<br>ACGCTCTTGGAAAAAATTGAGAAGGCATCGGACACTTGCTGATGAGTATTTGAAAAATT<br>CCATGAAAGATGAGGCCAAGATTGTTT GGAAGAGATTGAAAAGAAGAAGAAGAAAAAAA<br>GATAAAAGCAAATCAAAAATGCAGATTTTCGTCAAGACTTTGACCGGTA AAAACCATAACAT<br>TGGAAGTTGAATCTTCCGATACCATCGACAACGTTAAGTCGAAAATT                                                                                                                                                                                                                                                                                                                                                                                                          |
| terminator_POP6   | GATCCCAACGAAAAGAGAGACCACATGGTCTTCTTGAGTTTGT AACAGCTGCTGGGAT<br>TACACATGGCATGGATGA AACTATACAAATAGAATCGACCAGCTCTTTTAGCATCCATAGCT<br>ACTTCTTGCA TTTGTACTTTATAATATAAAGCATT TTTTAGAAGGCTTAATCGATATCAGAACT<br>ACCAATTGTTCTACTACAAG AAGTATGTGTCATTGAATGAAAAGAAAAAGGATGCATGG<br>AAATAGCACAACTTTATTTATTTTCTTCCCTTTGGAAATCGGAAATCAATGATATGCCCTC<br>TGATATAATAGCAAAGACATGATCGTTAATTTAGGCCTCGCTTTGAATCCCACACGACTAG<br>CGCTTTCAGATATTA AAAAGTTTAGATGTAGGTTT TAGCGGTAACAGTTATATAAATCGTGT<br>TTCTTCTCTTGATGAAA                                                                                                                                                                                                                                                                                                                                                                                                                                                                                                                                                                                                                                       |
| promoter_RPL3     | TAGGCAAAGCCAAGGAGCGTTTGCCATGA AACTCCACAATTATTA AATTCAGTGGTAAT<br>GCAACAGCAAGAGGAAAGGTGGAGGGATTAACGCATTT CAGACAGCTTTATAGGGGGA<br>AAGAAAGCACTCGCAA AACTTGCTGCCTGTTTCGCAGTCATTGGTTGCAAAA AACTAAACTC<br>TACTCACGCACACTGGAATGAATGGCAATATTCTTTTTAGGTTAACCGGCCGGACAGTA<br>ATATAGTAATCGTTTTGTACGTTTTTCAAGAAGCGACGCACA AACTGTTTTCCATTTTTTTT<br>TTTTTTTTTT CAGTGATCATCGTCCATGAAAAAATTTTTT CATTGTCTCTTTCGTGCTTCT<br>GGATATATAAAAATACGATTTATTTAGTTGTCTTTGTCAATCCTCATCTTTCTTACTCATTATT<br>TCATTTTCGGTTTTTGTTCATCTCTAGAACAAACACAGTTACTACAACAATCAATCAATGCAGA<br>TTTTCGTCAAGACTTTGACCGGTA AAAACCATAA                                                                                                                                                                                                                                                                                                                                                                                                                                                                                                                                                  |

|                             |                                                                                                                                                                                                                                                                                                                                                                                                                                                                                                                                                                                                                                                                                                 |
|-----------------------------|-------------------------------------------------------------------------------------------------------------------------------------------------------------------------------------------------------------------------------------------------------------------------------------------------------------------------------------------------------------------------------------------------------------------------------------------------------------------------------------------------------------------------------------------------------------------------------------------------------------------------------------------------------------------------------------------------|
| terminator_RPL3             | TGCTGGGATTACACATGGCATGGATGAACTATACAAATAGAGAAGTTTTGTTAGAAAATAA<br>ATCATTTTTTAATTGAGCATTCTTATTCTATTTTTATTTAAATAGTTTTATGTATTGTTAGCTAC<br>ATACAACAGTTTAAATCAAATTTCTTTTTCCCAAAGTCCAAAATGGAGGTTTATTTTGATG<br>ACCCGCATGCGATTATGTTTTGAAAGTATAAGACTACATACATGTACATATTTAAACATGT<br>AAACCCGTCCATTATATTGCTTACTTTCTCTTTTTTGCCGTTTTGACTTGGACCTCTGGT<br>TTGCTATTTCTTACAATCTTTGCTACAATACCATTGCCCCTGGGAGCTTGTTCAGGCC<br>TACGCAACCATAATGGAACCACTCGAAGGGACAAGCCACACGACTAGCGCTTCAGAT<br>ATTA AAAAGTTTAGATGT                                                                                                                                                                                                          |
| promRPL3_variant<br>3000527 | TTTAGCACGCGGGGTGTAAC TCAACAGAAAAATGTGCCATAGAACAAGACTAGGCCAAAA<br>GCCAAGGAGCGTTTGCCATGAACTTCCACAATTATTA AATTCAGTGGTAATGCAACAGCA<br>AGAGGAAAGGTGGAGGGATTAACGCATTT CAGACAGCTTTATAGGGGGAAAGAAAGCAC<br>TCGCAAAC TTTGCTGCCTGTTGCGAGTCATTGGTTGCAAAA ACTAACTCTACTCACGCAC<br>ACTGGAATGAATGGCAATATTCTTTTTTAGGTTAACCGGCCGGACAGTAATATAGTAATCG<br>TTTTGTACGTTTTTCAAGAAGCGACGCACA ACTGTTTTCCATTTTTTTTTTTTAAATTCAG<br>TGATCATCGTCCATGAATAAAAATTTTGATTTGTCTTATTCTGTGCTTCCCTGGATATATAAAAT<br>ACGATTACTTTAGTTATCTTCGTTAATCCCATCTATCTATACTCATCATCACACTTCGGAT<br>GTGTTT CATCTAGAACAAACACAGTTACTACAACAATCAATCAATGCAGATTTTCGTCAAG<br>ACTTTGACCGGTAAAACCATAACATTGGAAGTTGAATCTTCCGATACCATCGACAACGTT<br>AAGTCGAAAATT     |
| promRPL3_variant<br>3059399 | TTTAGCACGCGGGGTGTAAC TCAACAGAAAAATGTGCCATAGAACAAGACTAGGCCAAAA<br>GCCAAGGAGCGTTTGCCATGAACTTCCACAATTATTA AATTCAGTGGTAATGCAACAGCA<br>AGAGGAAAGGTGGAGGGATTAACGCATTT CAGACAGCTTTATAGGGGGAAAGAAAGCAC<br>TCGCAAAC TTTGCTGCCTGTTGCGAGTCATTGGTTGCAAAA ACTAACTCTACTCACGCAC<br>ACTGGAATGAATGGCAATATTCTTTTTTAGGTTAACCGGCCGGACAGTAATATAGTAATCG<br>TTTTGTACGTTTTTCAAGAAGCGACGCACA ACTGTTTTCCATTTTTTTTTTTTCGTTTTTTCA<br>GTGATCATCGTCCATGAAAAAATCTGTCTTGC ACTCTTTTCGTGCTTCCCTGGATATATAA<br>AATACGAGTTATTTAGTTGTATTTGTCAAGTTTCTTCCTTACTTTCTTATTATTTTATTTCCGT<br>TTTGTT CATCTCTAGAACAAACACAGTTACTACAACAATCAATCAATGCAGATTTTCGTCAA<br>GACTTTGACCGGTAAAACCATAACATTGGAAGTTGAATCTTCCGATACCATCGACAACGT<br>TAAGTCGAAAATT |
| promRPL3_variant<br>3080857 | TTTAGCACGCGGGGTGTAAC TCAACAGAAAAATGTGCCATAGAACAAGACTAGGCCAAAA<br>GCCAAGGAGCGTTTGCCATGAACTTCCACAATTATTA AATTCAGTGGTAATGCAACAGCA<br>AGAGGAAAGGTGGAGGGATTAACGCATTT CAGACAGCTTTATAGGGGGAAAGAAAGCAC<br>TCGCAAAC TTTGCTGCCTGTTGCGAGTCATTGGTTGCAAAA ACTAACTCTACTCACGCAC<br>ACTGGAATGAATGGCAATATTCTTTTTTAGGTTAACCGGCCGGACAGTAATATAGTAATCG<br>TTTTGTACGTTTTTCAAGAAGCGACGCACA ACTGTTTTCCATTTTTTTTTTTTGTGGCA<br>GTGATCATCGTCCATGAAAAAAGTTTTTCGTAAGTATCTTGCGTGCTTCCCTGGATATATAA<br>AATACGTTTATTTAGGTGGCTATGTCAATCCTCTTCCTTCTTCTCGTTCTTTCTTTTCC<br>TTTTGTTCATCTCTAGAACAAACACAGTTACTACAACAATCAATCAATGCAGATTTTCGTCA<br>AAGACTTTGACCGGTAAAACCATAACATTGGAAGTTGAATCTTCCGATACCATCGACAAC<br>GTTAAGTCGAAAATT         |
| promRPL3_variant<br>3438152 | TTTAGCACGCGGGGTGTAAC TCAACAGAAAAATGTGCCATAGAACAAGACTAGGCCAAAA<br>GCCAAGGAGCGTTTGCCATGAACTTCCACAATTATTA AATTCAGTGGTAATGCAACAGCA<br>AGAGGAAAGGTGGAGGGATTAACGCATTT CAGACAGCTTTATAGGGGGAAAGAAAGCAC<br>TCGCAAAC TTTGCTGCCTGTTGCGAGTCATTGGTTGCAAAA ACTAACTCTACTCACGCAC<br>ACTGGAATGAATGGCAATATTCTTTTTTAGGTTAACCGGCCGGACAGTAATATAGTAATCG<br>TTTTGTACGTTTTTCAAGAAGCGACGCACA ACTGTTTTCCATTTTTTTTTTTGCTTCTTCA<br>GTGATCATCGTCCATGAATAACCCTGAGCATGCGTCGTGTTTCGTGCTTCCCTGGATATATA<br>AAATACTAATAGGTGAGTTTATATGACAAGCTTAATTGTTCTTTTCTCTTTGTTTCATTGAT<br>TTATTGTT CATCTCTAGAACAAACACAGTTACTACAACAATCAATCAATGCAGATTTTCGTCA<br>AGACTTTGACCGGTAAAACCATAACATTGGAAGTTGAATCTTCCGATACCATCGACAACG<br>TTAAGTCGAAAATT   |

|                                     |                                                                                                                                                                                                                                                                                                                                                                                                                                                                                                                                                                                                                                                                                                          |
|-------------------------------------|----------------------------------------------------------------------------------------------------------------------------------------------------------------------------------------------------------------------------------------------------------------------------------------------------------------------------------------------------------------------------------------------------------------------------------------------------------------------------------------------------------------------------------------------------------------------------------------------------------------------------------------------------------------------------------------------------------|
| <p>promRPL3_variant<br/>3480767</p> | <p>TTTAGCACGCGGGGTGTAACCTCAACAGAAAAATGTGCCATAGAACAAGACTAGGCCAAAA<br/>GCCAAGGAGCGTTTGCCATGAACCTCCACAATTATTAATTCAGTGGTAATGCAACAGCA<br/>AGAGGAAAGGTGGAGGGATTAACGCATTTAGACAGCTTTATAGGGGGAAAAGAAAGCAC<br/>TCGCAAACCTTGCTGCCTGTTTCGCAGTCATTGGTTGCAAAAACTAACTCTACTCACGCAC<br/>ACTGGAATGAATGGCAATATTCTTTTTAGGTTAACCGGCCGGACAGTAATATAGTAATCG<br/>TTTTGTACGTTTTCAAGAAGCGACGCACAACCTGTTTTCCATTTTTTTTTTCAATAGTCA<br/>GTGATCATCGTCCATGAAGGACATCAGCCAGGTGGCTCTGTCGTGCTTCCCTGGATATATA<br/>AAATATCTTTTCTTGAGTTGAATTTGTACATTGTTTTCGATCGTACTTATTCCCTCCGTTCT<br/>TATTTGTTTCATCTCTAGAACAACACAGTTACTACAACAATCAATCAATGCAGATTTTCGTCA<br/>AGACTTTGACCGGTAAAACCATAACATTGGAAGTTGAATCTTCCGATACCATCGACAACG<br/>TTAAGTCGAAAATT</p>    |
| <p>promRPL3_variant<br/>3529331</p> | <p>TTTAGCACGCGGGGTGTAACCTCAACAGAAAAATGTGCCATAGAACAAGACTAGGCCAAAA<br/>GCCAAGGAGCGTTTGCCATGAACCTCCACAATTATTAATTCAGTGGTAATGCAACAGCA<br/>AGAGGAAAGGTGGAGGGATTAACGCATTTAGACAGCTTTATAGGGGGAAAAGAAAGCAC<br/>TCGCAAACCTTGCTGCCTGTTTCGCAGTCATTGGTTGCAAAAACTAACTCTACTCACGCAC<br/>ACTGGAATGAATGGCAATATTCTTTTTAGGTTAACCGGCCGGACAGTAATATAGTAATCG<br/>TTTTGTACGTTTTCAAGAAGCGACGCACAACCTGTTTTCCATTTTTTTTTGCTTTTTCTCA<br/>GTGATCATCGTCCATGAAACTATTTTTTTTATTGATTTTTTCGTGCTTCCCTGGATATATAAAA<br/>TAGGCTCAATTTAGTTTATTTGGACAATCAGCATCGTAATCAGCTCCTATAAAAATAGCGG<br/>AATTGTTTCATCTCTAGAACAACACAGTTACTACAACAATCAATCAATGCAGATTTTCGTCA<br/>AGACTTTGACCGGTAAAACCATAACATTGGAAGTTGAATCTTCCGATACCATCGACAACG<br/>TTAAGTCGAAAATT</p>  |
| <p>promRPL3_variant<br/>7861215</p> | <p>TTTAGCACGCGGGGTGTAACCTCAACAGAAAAATGTGCCATAGAACAAGACTAGGCCAAAA<br/>GCCAAGGAGCGTTTGCCATGAACCTCCACAATTATTAATTCAGTGGTAATGCAACAGCA<br/>AGAGGAAAGATGGGGCGATTAACGCATTTAGACAGCTTTATAGGGGGAAAAGAAAGCAC<br/>TCGCAAACCTTGCTGCCTGTTTCACAGTCATTGGTTGCAAAAACTAACTCTACTCTCGCTC<br/>ACTGGAATGAATGGCAATATTCTTTTTAGGTTAACCGGCCAGGATAGTAATATAGTAATCGT<br/>TTTGTACGTTTTCAAGAAGCGACGCACAACCTGTTTTCCATTTTTTTTTGTTTTTTTTCAGT<br/>GATCATCGTCCATTAATAAATTTTTTTCATTTGTCTCTTTAGTGCTTCCCTGGATATATAAATA<br/>CGATTGATTTAATTGTCTTTGACAATCCTCATCTTCTTTAATCATCGATTCAATTCGGTTTT<br/>TGTTTCATCTCTAGAACAACACAGTTACTACAACAATCAATCAATGCAGATTTTCGTCAAGA<br/>CTTTGACCGGTAAAACCATAACATTGGAAGTTGAATCTTCCGATACCATCGACAACGTTA<br/>AGTCGAAAATT</p> |
| <p>promRPL3_variant<br/>8172100</p> | <p>TTTAGCACGCGGGGTGTAACCTCAACAGAAAAATGTGCCATAGAACAAGACTAGGCCAAAA<br/>GCCAAGGAGCGTTTGCCATGAACCTCCACAATGATTAATTCAGGGGTAATGCAGCAGC<br/>AAGAGGAAAGGTGGGGCGATTAACCCATTTAGACAGCTTTATAGGGGGAAAGAAAGC<br/>ACTCGCAATCTTGCTGCCTTTTTCGCTGTAATTGGTTGCAAAAACTAGACTCTACTCACGC<br/>ACACTGGAATGAATGTGAATATTCTTTTTAGGTTAACCGGCCGGACAGTAAAATAGTAAT<br/>TGTTTTGGACGTTTTCAAGAAGCGACGCACAACCTGTTTTCCATTTTTTTTTTTTTTTTTTA<br/>AAGTGATCATACTCCATGAAAAAATGTTAATTTGTCTTTTCGTGCTACCTGGATATATA<br/>AAATACGATCACTTTAGTTTTCTTTGCCATCCTCATCTATCACTTCTCATTATATCATTTCCG<br/>GTATTGTTTCATCTCTAGAACAACACAGTTACTACAACAATCAATCAATGCAGATTTTCGTCA<br/>AAGACTTTGACCGGTAAAACCATAACATTGGAAGTTGAATCTTCCGATACCATCGACAAC<br/>GTTAAGTCGAAAATT</p>     |
| <p>promRPL3_variant<br/>8207535</p> | <p>TTTAGCACGCGGGGTGTAACCTCAACAGAAAAATGTGCCATAGAACAAGACTAGGCCAAAA<br/>GCCAAGGAGCGTTTGCCATGAACCTCCACAATTATTAATTCAGTGGTAATGCAAGAGTA<br/>AGAGGAGAGGTGGGGGGATTAACGCATTTAGACAGCTTTATAGGGGGAAAAGAAAGGAT<br/>TCGCGGACTTGCTGGCTGTTTCGTAGTCTATGGCTGCAAAAACTACACTCTACTCACGCAT<br/>ACTGGAATGGTTGGCAATATTCTTTTTAGGTTAACCGGCCGGACAGTAATATAGTAATCG<br/>TTTTGTACGTTTCTCAAGAAGAGACGAACAACCTGTTTTGCATTTATTTTTTTTTTTTTCCG<br/>TGATCGTCGACCATTAATAAATTTTTTTCATTCGTGCTTGCCTGCTTCCCTGGATATATAAA<br/>ACACGAGTTATTTAGTTGTCTTTGTCAATTTCTCAACTTTCTTTATTCAATTTCAATTCGGT<br/>TCTTTTCATCTCTAGAACAACACAGTTACTACAACAATCAATCAATGCAGATTTTCGTCAA<br/>GACTTTGACCGGTAAAACCATAACATTGGAAGTTGAATCTTCCGATACCATCGACAACGT<br/>TTAAGTCGAAAATT</p>   |

|                             |                                                                                                                                                                                                                                                                                                                                                                                                                                                                                                                                                                                                                                                                                 |
|-----------------------------|---------------------------------------------------------------------------------------------------------------------------------------------------------------------------------------------------------------------------------------------------------------------------------------------------------------------------------------------------------------------------------------------------------------------------------------------------------------------------------------------------------------------------------------------------------------------------------------------------------------------------------------------------------------------------------|
| promRPL3_variant<br>8248101 | TTTAGCACGCGGGGTGTAACCAACAGAAAAATGTGCCATAGAACAAGACTAGGCAAAA<br>GCCAAGGAGCGTTTGCCATGAACTTCCACAATTATTAAATTCAGTGGTAATGCAAAAAGCA<br>AGGGGAAAAGTGGAGGGATAAACGCATTTCCGACGGCTTTATAGGCGGAAAGAAAAGCA<br>CTCACAGACTTGCGGCCTGTTACAGTCATTCGTTGCAAAAACAAAACCTCTACTCACGC<br>AACTGGAATGAATGGCAATATTCTTCTTAGGTTTACCGGCCGGACAGTAATATATTAAT<br>CGTTTCGTACGTTTTCAAAGAAGCGACGCACAACCTGTTTTCCATTTTTTTTTTCTCTT<br>CGGTGATCATCGTCCTTGAAAAAATTTTTTCAGCTGCCTCTTTCGTGCTTCCTGGATATAT<br>AAAATACGATTTATTTAGTTGTATTTTTTCAGGCCTCATTCTTCATTCTTGTATTTTCATTTT<br>GTTTTTCCTCATCTCTAGAACACACAGTTACTACAACAATCAATCAATGCAGATTTTCGT<br>CAAGACTTTGACCGGTAAAACCATAACATTGGAAGTTGAATCTTCCGATACCATCGACAA<br>CGTTAAGTCGAAAATT |
|-----------------------------|---------------------------------------------------------------------------------------------------------------------------------------------------------------------------------------------------------------------------------------------------------------------------------------------------------------------------------------------------------------------------------------------------------------------------------------------------------------------------------------------------------------------------------------------------------------------------------------------------------------------------------------------------------------------------------|

**Supplementary Table 10.** Minimal Media Recipe.

|                                           | <b>Minimal Media</b>   |
|-------------------------------------------|------------------------|
| $\text{KH}_2\text{PO}_4$                  | 14.4 g·L <sup>-1</sup> |
| $\text{MgSO}_4 \cdot 7\text{H}_2\text{O}$ | 0.5 g·L <sup>-1</sup>  |
| $(\text{NH}_4)\text{SO}_4$                | 7.5 g·L <sup>-1</sup>  |
| Trace metals stock solution*              | 2 ml·L <sup>-1</sup>   |
| Vitamin stock solution**                  | 1 ml·L <sup>-1</sup>   |
| Glucose 50%                               | 40 mL·L <sup>-1</sup>  |

\*Trace metals solution:  $\text{FeSO}_4 \cdot 7\text{H}_2\text{O}$  3.0 g·L<sup>-1</sup>,  $\text{ZnSO}_4 \cdot 7\text{H}_2\text{O}$  4.5 g·L<sup>-1</sup>,  $\text{CaCl}_2 \cdot 2\text{H}_2\text{O}$  4.5 g·L<sup>-1</sup>,  $\text{MnCl}_2 \cdot 4\text{H}_2\text{O}$  1 g·L<sup>-1</sup>,  $\text{CoCl}_2 \cdot 6\text{H}_2\text{O}$  300 mg·L<sup>-1</sup>,  $\text{CuSO}_4 \cdot 5\text{H}_2\text{O}$  300 mg·L<sup>-1</sup>,  $\text{Na}_2\text{MoO}_4 \cdot 2\text{H}_2\text{O}$  400 mg·L<sup>-1</sup>,  $\text{H}_3\text{BO}_3$  1 g·L<sup>-1</sup>, KI 100 mg·L<sup>-1</sup>,  $\text{Na}_2\text{EDTA} \cdot 2\text{H}_2\text{O}$  19 g·L<sup>-1</sup>

\*\*Vitamins solution: d-Biotin 50 mg·L<sup>-1</sup>, D-Pantothenic acid hemicalcium salt 1.0 g·L<sup>-1</sup>, Thiamin-HCl 1.0 g·L<sup>-1</sup>, Pyridoxin-HCl 1.0 g·L<sup>-1</sup>, Nicotinic acid 1.0 g·L<sup>-1</sup>, 4-aminobenzoic acid 0.2 g·L<sup>-1</sup>, myo-Inositol 25 g·L<sup>-1</sup>

The pH of the media was adjusted to 6.5 using KOH pellets. After sterilization, 2 mL·L<sup>-1</sup> of the trace element solution and 1 mL·L<sup>-1</sup> of the vitamin solution were added.

**Supplementary Table 11.** Overview of data sources used in the study.

| <b>Description</b>                                                                                  | <b>Link</b>                                                                                                                                                                                                                                             |
|-----------------------------------------------------------------------------------------------------|---------------------------------------------------------------------------------------------------------------------------------------------------------------------------------------------------------------------------------------------------------|
| <i>Saccharomyces cerevisiae</i> S288c R64-1-1 ORFs, UTRs                                            | <a href="ftp://ftp.ensemblgenomes.org/pub/fungi/release-41/gff3/saccharomyces_cerevisiae">ftp://ftp.ensemblgenomes.org/pub/fungi/release-41/gff3/saccharomyces_cerevisiae</a>                                                                           |
| <i>Saccharomyces cerevisiae</i> S288c R64-1-1 genome sequence                                       | <a href="ftp://ftp.ensemblgenomes.org/pub/fungi/release-41/fasta/saccharomyces_cerevisiae/dna/">ftp://ftp.ensemblgenomes.org/pub/fungi/release-41/fasta/saccharomyces_cerevisiae/dna/</a>                                                               |
| <i>Saccharomyces cerevisiae</i> S288c R64-1-1 additional Xu et al. 2009 UTRs <sup>28</sup>          | <a href="https://downloads.yeastgenome.org/published_datasets/Xu_2009_PMIID_19169243/track_files/Xu_2009_ORF-Ts_V64.gff3">https://downloads.yeastgenome.org/published_datasets/Xu_2009_PMIID_19169243/track_files/Xu_2009_ORF-Ts_V64.gff3</a>           |
| <i>Saccharomyces cerevisiae</i> S288c R64-1-1 additional Nagalakshmi et al. 2008 UTRs <sup>29</sup> | <a href="https://science.sciencemag.org/highwire/filestream/589738/field_highwire_adjunct_files/1/1158441_tables_s2_to_s6.zip">https://science.sciencemag.org/highwire/filestream/589738/field_highwire_adjunct_files/1/1158441_tables_s2_to_s6.zip</a> |
| SGD gene names <sup>30</sup>                                                                        | <a href="https://downloads.yeastgenome.org/curation/chromosomal_feature/SGD_features.tab">https://downloads.yeastgenome.org/curation/chromosomal_feature/SGD_features.tab</a>                                                                           |
| SGD motif information <sup>30</sup>                                                                 | <a href="https://www.yeastgenome.org">https://www.yeastgenome.org</a>                                                                                                                                                                                   |
| Transcriptomics data <sup>31</sup>                                                                  | <a href="http://dee2.io/mx/">http://dee2.io/mx/</a>                                                                                                                                                                                                     |
| Yeast Jaspar DNA seq motifs (JASPAR2018_CORE_fungi_non-redundant.meme) <sup>1</sup>                 | <a href="http://meme-suite.org/meme-software/Databases/motifs/motif_databases.12.19.tgz">http://meme-suite.org/meme-software/Databases/motifs/motif_databases.12.19.tgz</a>                                                                             |
| Yeast DNA seq motifs (YEASTRACT_20130918.meme) <sup>27</sup>                                        | <a href="http://meme-suite.org/meme-software/Databases/motifs/motif_databases.12.19.tgz">http://meme-suite.org/meme-software/Databases/motifs/motif_databases.12.19.tgz</a>                                                                             |
| Deep learning-uncovered expression-related motifs and motif associations <sup>8</sup>               | <a href="https://zenodo.org/record/3905252">https://zenodo.org/record/3905252</a>                                                                                                                                                                       |
| 80 bp proximal promoter designs <sup>32</sup>                                                       | <a href="https://zenodo.org/record/4436477">https://zenodo.org/record/4436477</a>                                                                                                                                                                       |
| 5' UTR designs <sup>14</sup>                                                                        | <a href="https://github.com/Seeliglab/2017---Deep-learning-yeast-UTRs/tree/master/Data">https://github.com/Seeliglab/2017---Deep-learning-yeast-UTRs/tree/master/Data</a>                                                                               |

## Supplementary References

1. Khan, A. *et al.* JASPAR 2018: update of the open-access database of transcription factor binding profiles and its web framework. *Nucleic Acids Res.* **46**, D1284 (2018).
2. Basehoar, A. D., Zanton, S. J. & Pugh, B. F. Identification and distinct regulation of yeast TATA box-containing genes. *Cell* **116**, 699–709 (2004).
3. Lubliner, S., Keren, L. & Segal, E. Sequence features of yeast and human core promoters that are predictive of maximal promoter activity. *Nucleic Acids Res.* **41**, 5569–5581 (2013).
4. Li, J., Liang, Q., Song, W. & Marchisio, M. A. Nucleotides upstream of the Kozak sequence strongly influence gene expression in the yeast *S. cerevisiae*. *J. Biol. Eng.* **11**, 25 (2017).
5. Nakagawa, S., Niimura, Y., Gojobori, T., Tanaka, H. & Miura, K.-I. Diversity of preferred nucleotide sequences around the translation initiation codon in eukaryote genomes. *Nucleic Acids Res.* **36**, 861–871 (2008).
6. Guo, Z. & Sherman, F. 3'-end-forming signals of yeast mRNA. *Trends Biochem. Sci.* **21**, 477–481 (1996).
7. Curran, K. A. *et al.* Short Synthetic Terminators for Improved Heterologous Gene Expression in Yeast. *ACS Synth. Biol.* **4**, 824–832 (2015).
8. Zrimec, J. *et al.* Deep learning suggests that gene expression is encoded in all parts of a co-evolving interacting gene regulatory structure. *Nat. Commun.* **11**, 6141 (2020).
9. Xi, L. *et al.* Predicting nucleosome positioning using a duration Hidden Markov Model. *BMC Bioinformatics* **11**, 346 (2010).
10. Kato, H., Shimizu, M. & Urano, T. Chemical map-based prediction of nucleosome positioning using the Bioconductor package nuCpos. *bioRxiv* 2019.12.25.888305 (2020) doi:10.1101/2019.12.25.888305.
11. van der Maaten, L. Visualizing Data using t-SNE.  
<https://www.jmlr.org/papers/volume9/vandermaaten08a/vandermaaten08a.pdf?fbclid=IwAR0Bgg1eA5TFmqOZeCQXsloL6PKrVXUFaskUKtg6yBhVXAFFvZA6yQiYx-M> (2008).
12. Espinar, L., Schikora Tamarit, M. À., Domingo, J. & Carey, L. B. Promoter architecture determines cotranslational regulation of mRNA. *Genome Res.* **28**, 509–518 (2018).
13. Dvir, S., Velten, L., Sharon, E. & Zeevi, D. Deciphering the rules by which 5'-UTR sequences affect protein expression in yeast. *Proc. Natl. Acad. Sci.* **110**, E2792–E2801 (2013).
14. Cuperus, J. T., Groves, B. & Kuchina, A. Deep learning of the regulatory grammar of yeast 5' untranslated regions from 500,000 random sequences. *Genome Res.* **27**, 1–10 (2017).
15. Cheng, J., Maier, K. C., Avsec, Ž., Rus, P. & Gagneur, J. Cis-regulatory elements explain most of the mRNA stability variation across genes in yeast. *RNA* **23**, 1648–1659 (2017).
16. Shalem, O. *et al.* Systematic dissection of the sequence determinants of gene 3'end mediated expression control. *PLoS Genet.* **11**, e1005147 (2015).
17. Morse, N. J., Gopal, M. R., Wagner, J. M. & Alper, H. S. Yeast Terminator Function Can Be Modulated and Designed on the Basis of Predictions of Nucleosome Occupancy. *ACS*



- Synth. Biol.* **6**, 2086–2095 (2017).
18. Zrimec, J., Buric, F., Kokina, M., Garcia, V. & Zelezniak, A. Learning the regulatory code of gene expression. *Front. Mol. Biosci.* **8**, (2021).
  19. Grant, C. E., Bailey, T. L. & Noble, W. S. FIMO: scanning for occurrences of a given motif. *Bioinformatics* **27**, 1017–1018 (2011).
  20. Zhao, J., Hyman, L. & Moore, C. Formation of mRNA 3' ends in eukaryotes: mechanism, regulation, and interrelationships with other steps in mRNA synthesis. *Microbiol. Mol. Biol. Rev.* **63**, 405–445 (1999).
  21. Rhee, H. S. & Pugh, B. F. Genome-wide structure and organization of eukaryotic pre-initiation complexes. *Nature* **483**, 295–301 (2012).
  22. Yang, C., Bolotin, E., Jiang, T., Sladek, F. M. & Martinez, E. Prevalence of the initiator over the TATA box in human and yeast genes and identification of DNA motifs enriched in human TATA-less core promoters. *Gene* **389**, 52–65 (2007).
  23. Ancona, M., Ceolini, E., Öztireli, C. & Gross, M. Towards better understanding of gradient-based attribution methods for Deep Neural Networks. *arXiv [cs.LG]* (2017).
  24. Neymotin, B., Ettore, V. & Gresham, D. Multiple Transcript Properties Related to Translation Affect mRNA Degradation Rates in *Saccharomyces cerevisiae*. *G3* **6**, 3475–3483 (2016).
  25. van Helden, J., del Olmo, M. & Pérez-Ortín, J. E. Statistical analysis of yeast genomic downstream sequences reveals putative polyadenylation signals. *Nucleic Acids Res.* **28**, 1000–1010 (2000).
  26. Dvir, S. *et al.* Deciphering the rules by which 5'-UTR sequences affect protein expression in yeast. *Proc. Natl. Acad. Sci. U. S. A.* **110**, E2792–801 (2013).
  27. Teixeira, M. C. *et al.* YEASTRACT: an upgraded database for the analysis of transcription regulatory networks in *Saccharomyces cerevisiae*. *Nucleic Acids Res.* **46**, D348–D353 (2018).
  28. Xu, Z. *et al.* Bidirectional promoters generate pervasive transcription in yeast. *Nature* **457**, 1033–1037 (2009).
  29. Nagalakshmi, U. *et al.* The transcriptional landscape of the yeast genome defined by RNA sequencing. *Science* **320**, 1344–1349 (2008).
  30. Cherry, J. M. *et al.* SGD: *Saccharomyces Genome Database*. *Nucleic Acids Res.* **26**, 73–79 (1998).
  31. Ziemann, M., Kaspi, A. & El-Osta, A. Digital expression explorer 2: a repository of uniformly processed RNA sequencing data. *Gigascience* **8**, 1–13 (2019).
  32. Vaishnav, E. D. *et al.* The evolution, evolvability and engineering of gene regulatory DNA. *Nature* **603**, 455–463 (2022).
